# Supplementary material for: Paternal multigenerational exposure to an obesogenic diet drives epigenetic predisposition to metabolic diseases in mice
Source: eLife. 2021 Mar 30;10:e61736. doi: 10.7554/eLife.61736 (PMC8051948; doi:10.7554/eLife.61736)
Supplement: Figure 4—source data 1. [file elife-61736-fig4-data1.xlsx]

## Sheet: DE WD1
Sequence	logFC	PValue	adjpValue	Length	Match_Genome	Annotation	Reads_CD1	Reads_CD2	Reads_CD3	Reads_HFD1.1	Reads_HFD1.2	Reads_HFD1.3
ACTAATCCTAGCCCTAGCCCTAC	-1.2103684481793	1.72938472421851e-05	0.0085805509749538	23	Yes	16S-rR0	7134	3246	5705	2150	1058	2482
CTAATCCTAGCCCTAGCCC	-2.52821646075276	5.53732316037242e-06	0.00331757106637409	19	Yes	16S-rR0	1369	1301	1088	217	48	251
GAAATTTCGGTTGGG	-2.87247876128187	3.2196715549426e-06	0.00206203309620514	15	Yes	16S-rR0	887	1291	862	73	151	126
TAAGTTTGAAATTTCGGTTGGG	-2.96202675271385	4.56024197903153e-06	0.00281698584068357	22	Yes	16S-rR0	455	993	1198	0	206	98
TAATCCTAGCCCTAGCCC	-3.18105348804485	3.46903255040616e-07	0.000302963988520503	18	Yes	16S-rR0	1078	960	1058	172	13	96
TGAAATTTCGGTTGGG	-3.65977603317827	9.54728781825472e-06	0.0052307308745854	16	Yes	16S-rR0	380	822	295	18	26	49
GTTTGAAATTTCGGTTGGG	-4.38982135607594	4.94058261463142e-05	0.0204216856605822	19	Yes	16S-rR0	121	140	441	15	12	4
AAAGAGGGACAGCTCTTCTGGAACGGA	-4.88802794713557	2.66233363274116e-05	0.0122800138810186	27	Yes	16S-rR0	201	346	112	14	0	0
AAAGTATTGGAGAAAGAAATTCGTA	-5.53424956738766	0.000122562319911909	0.0423901297527726	25	Yes	16S-rR0	109	188	100	0	0	79
TTGATCAACGGACCAAGTTACCCTAGGG	-5.60158028080575	1.39829092366396e-06	0.00102514963125832	28	Yes	16S-rR0	333	202	216	0	0	11
TCCTACGTGATCTGAGTT	-6.79270867325408	3.85689781702708e-05	0.0167109245308656	18	Yes	16S-rR0	123	105	101	0	0	222
ACTAATCCTAGCCCTAGCCCTACACAAATATAATTATACTA	2.74419855023988	7.41747607052146e-06	0.00423023898846863	41	Yes	16S-rR0	215	78	152	1421	489	646
TCCTAGCCCTAGCCCTACACAAATATAATTATACTATTATATA	3.34684930692609	7.54216181211221e-05	0.0287855214670634	43	Yes	16S-rR0	41	44	40	332	442	146
ATCAAGAACGAAAGTCGGAGGTTCGAAG	-1.96923755362253	4.41017477300076e-05	0.0185932544067454	28	Yes	18S-rR0	2585	1959	464	369	296	1190
CGTGATGGGGATCGGGG	-2.04287596121495	4.67825963703406e-05	0.019534644704241	17	Yes	18S-rR0	2622	1876	134	345	231	2229
CGAGCGGTCGGCGTCCC	-2.04497856260834	1.83897432382387e-05	0.00901987767157941	17	Yes	18S-rR0	3173	1658	400	388	231	392
AGTACGCACGGCCGG	-2.11073804998748	5.14382706735903e-07	0.000424853795960403	15	Yes	18S-rR0	4789	1187	1416	469	234	650
AGCTGAGTGTCCCGCGGGGCC	-2.1211628964588	6.19985789602088e-05	0.0245347927633798	21	Yes	18S-rR0	1523	2386	180	381	200	1058
TTCTTGGACCGGCGCA	-2.1274327175434	3.21139049489448e-05	0.0143377778032873	16	Yes	18S-rR0	3073	1205	188	323	185	3734
AGTACGCACGGCCGGT	-2.15695660443459	1.8308023169459e-05	0.00900357231226025	16	Yes	18S-rR0	2961	1024	637	194	364	302
AGTCGGAGGTTCGAA	-2.25474147490202	5.53228147444154e-05	0.0223210131407971	15	Yes	18S-rR0	2254	818	493	132	171	403
AAGTCGGAGGTTCGAAGA	-2.47412112302896	4.92793438207348e-06	0.00300086968125413	18	Yes	18S-rR0	2057	1339	671	250	239	138
AACGAAAGTCGGAGGTTCGAAG	-2.54717255921991	5.94533128220283e-07	0.000478710857966849	22	Yes	18S-rR0	3340	1250	318	282	87	286
CTTAGATGTCCGGGGCTGCA	-2.5530615769969	5.00729999660867e-05	0.020643067721476	20	Yes	18S-rR0	680	1431	600	183	156	0
CGAGCGGTCGGCGTCCCC	-2.56359318683865	3.63510427562179e-07	0.0003154896808931	18	Yes	18S-rR0	2571	1795	676	305	98	274
AAAGTCGGAGGTTCGAAGACGATCAGATAC	-2.59640096509375	2.74635636935085e-06	0.00180586168366058	30	Yes	18S-rR0	910	2322	708	143	320	109
GTACGCACGGCCGGT	-2.62385619900903	2.18251544893884e-06	0.00148483001586598	15	Yes	18S-rR0	1941	993	963	103	158	248
AAGTCGGAGGTTCGAAG	-2.85880528146882	2.01926553361747e-07	0.000187519093779386	17	Yes	18S-rR0	2599	1290	380	181	69	209
AACTGCGAATGGCTCAT	-2.93278895981095	7.82894046130645e-05	0.0295742870212565	17	Yes	18S-rR0	710	500	557	82	44	45
CGAACGTCTGCCCTATC	-3.30860098432708	1.41293578304041e-06	0.00103371430598524	17	Yes	18S-rR0	978	615	823	92	100	29
TCGAGGCCCTGTAATTGGAATGAGTCCACT	-3.39186728541676	1.81306161897539e-05	0.00893999826085752	30	Yes	18S-rR0	642	665	319	40	33	52
ACCGCAGCTAGGAATAATGGAA	-3.41926442547039	1.12979935499267e-05	0.00604719406924465	22	Yes	18S-rR0	347	683	643	73	37	27
AAAGTCGGAGGTTCGAAGACGATCAGAT	-3.42518280445887	3.83780792882549e-05	0.0166411533063212	28	Yes	18S-rR0	485	429	448	45	42	1974
CGCAGCTAGGAATAATGGAA	-3.77349771470243	1.34397859006681e-05	0.00697254590874606	20	Yes	18S-rR0	242	520	516	19	12	43
CCAACTTCTTAGAGGGACAAGTGGCGT	-4.15431409003399	1.02152261876666e-05	0.00553679171158169	27	Yes	18S-rR0	749	179	180	7	30	16
AACGAGGAATTCCCAGTAAGTGCGG	-4.85447363601273	0.000134820255002856	0.0453626194957977	25	Yes	18S-rR0	177	191	136	4	0	1757
CGTAGTTGGATCTTGGGA	-4.9237302410971	0.000121141824728277	0.0420816791273993	18	Yes	18S-rR0	135	252	113	14	0	173
TAAAGTTGCTGCAGTT	-4.94396961299927	1.15407721694802e-06	0.00086546471670426	16	Yes	18S-rR0	484	234	279	9	20	1
CCGCCGGGGTCGGCC	-5.01296970479956	0.00010948866552241	0.0389317099824069	15	Yes	18S-rR0	210	104	171	0	1	367
AAAGTTGCTGCAGTT	-5.64044660606436	2.77676537368978e-05	0.0127026756860937	15	Yes	18S-rR0	176	118	191	0	0	3143
ATTAAAGTTGCTGCAGTT	-5.82276929403494	5.38122656577734e-07	0.000442236818611427	18	Yes	18S-rR0	227	363	193	6	1	4
GCACGGCCGGTACAGTGAAACT	-5.86627698754779	5.07675415639319e-05	0.0208162440684965	22	Yes	18S-rR0	155	112	143	0	0	1159
AAGGTTTCCGTAGGT	-6.63511977887412	9.76856208224275e-05	0.0355980713316209	15	Yes	18S-rR0	19	130	140	0	0	12731
CCCTTAGATGTCCGGGGCTGC	-8.88493981371886	0.000116906665143588	0.0410455102402997	21	Yes	18S-rR0	96	103	0	0	0	7089
TATCTAGAGGAAGTA	-8.90132621514952	0.000108467229671265	0.0386672141398159	15	Yes	18S-rR0	74	102	22	0	0	1257
AATGAGTCCACTTTAAATCC	-8.96756712665266	7.94247048045187e-05	0.0299220089722987	20	Yes	18S-rR0	0	174	33	0	0	182
AGCGATTTGTCTGGTTAATTC	-9.01393457076314	6.32710794659261e-05	0.0249674311385406	21	Yes	18S-rR0	73	60	73	0	0	103
AATAACAATACAGGACTCTT	-9.07348951947756	4.67143989231415e-05	0.019534644704241	20	Yes	18S-rR0	0	84	124	0	0	252
ACGCACGGCCGGTACAGTGAAACTGC	-9.16481426289517	2.86038577689269e-05	0.0129892286147257	26	Yes	18S-rR0	136	47	50	0	0	4629
AGAACGAAAGTCGGAGGTTCG	0.904762015364953	2.55271904647965e-06	0.00169529144875804	21	Yes	18S-rR0	12844	5907	1282	8964	8481	12387
TGTCCGGGGCTGCACGCGCG	1.59059497223147	2.4488974493774e-05	0.0114375621946236	20	Yes	18S-rR0	1837	588	485	2615	1354	3026
TAACGAACGAGACTCTGGC	1.89551941012137	6.23651347203089e-05	0.0246353886840842	19	Yes	18S-rR0	413	502	426	878	1917	323
TAACGAACGAGACTCTGGCATGCTAACTA	3.29544016148644	2.67692448604313e-05	0.0123371013596226	29	Yes	18S-rR0	68	60	37	463	543	2548
AACACGGGAAACCTCACCCGGCCCGGACACGGACAGGATTGACA	3.61223536250242	8.74672560136432e-05	0.0326101826505735	44	Yes	18S-rR0	13	36	35	450	336	51
TAGGACCGCGGTTCTATTTTGTTGGTTTTCGGAACTGAGGCC	3.81519353273987	1.8366169090431e-05	0.00901625176695791	42	Yes	18S-rR0	25	41	20	557	351	157
AACACGGGAAACCTCACCCGGCCCGGACACGGACAGGATTGAC	3.91684365390436	1.50608636507139e-05	0.00764277105422704	43	Yes	18S-rR0	25	36	17	533	350	153
CACGGGAAACCTCACCCGGCCCGGACACGGACAGGATTGACA	4.04490438558261	1.24978329207595e-05	0.00653865495316243	42	Yes	18S-rR0	33	27	9	398	380	203
CACCGCCCGTCGCTACTACCG	4.20246192104534	0.000108665028642059	0.038712958637512	21	Yes	18S-rR0	23	16	0	401	145	52
ACGGGAAACCTCACCCGGCCCGGACACGGACAGGATTGACA	4.28584849517608	4.49942379754981e-05	0.01894961410247	41	Yes	18S-rR0	9	25	7	312	205	2815
CTCCTACTTGGATAACTGTGGTAATTCTAGAGCTA	4.38699824113384	9.84843929079175e-05	0.0358222682006966	35	Yes	18S-rR0	6	20	5	130	200	363
ACGGGAAACCTCACCCGGCCCGGACACGGACAGGATTGACAG	4.4227003016056	7.1898662864715e-05	0.02770485197897	42	Yes	18S-rR0	19	5	7	186	249	2004
ATAACGAACGAGACTCTGGCATGCTAACTAGTTACGCGAC	4.59976407807782	5.85221914304143e-05	0.0234927808667958	40	Yes	18S-rR0	12	15	0	67	351	1830
CACGGGAAACCTCACCCGGCCCGGACACGGACAGGATTGACAG	4.61018586477369	4.20079241858478e-06	0.00262698039024832	43	Yes	18S-rR0	21	18	2	417	233	192
GTGCATGGCCGTTCTTAGTTGGTGGAGCGATTTGTCTGGT	4.79846294045706	4.09863976940645e-05	0.0174596413846757	40	Yes	18S-rR0	0	15	7	172	303	720
CTCGCTCCTCTCCTACTTGGATAACTGTGGTAATTCTAGAGC	4.96354918205061	6.88299271443542e-06	0.0039783555088758	42	Yes	18S-rR0	7	16	2	320	166	169
CACGGGAAACCTCACCCGGCCCGGACACGGACAGGATTGACAGAT	5.01052238325306	9.4919373796667e-05	0.0347719433831459	45	Yes	18S-rR0	7	4	4	151	186	4760
TTAGTTGGTGGAGCGATTTGTCTGGTTAATTCCG	5.03482235501998	6.84357396333385e-05	0.026572620046202	34	Yes	18S-rR0	10	6	0	190	163	563
AACACGGGAAACCTCACCCGGCCCGGACACGGACAGGATTGACAG	5.21225912700593	2.72602361805379e-07	0.000243415560856313	45	Yes	18S-rR0	11	17	1	498	315	122
ACGGGAAACCTCACCCGGCCCGGACACGGACAGGATTGACAGAT	5.62486232728206	2.03320090408989e-05	0.00982549186253117	44	Yes	18S-rR0	5	3	2	186	157	99
CGGGAAACCTCACCCGGCCCGGACACGGACAGGATTGACAGAT	5.63294796763321	1.14192451287281e-05	0.00609112282470479	43	Yes	18S-rR0	3	7	1	228	211	58
GTGCATGGCCGTTCTTAGTTGGTGGAGCGATTTGTCTGGTT	5.65706507400455	4.57365601439562e-07	0.000383217352580616	41	Yes	18S-rR0	0	10	6	191	417	139
TTAAGTCCCTGCCCTTTGTACACACCGCCCGTCGC	5.72729376436584	5.75205927642133e-06	0.00342048015819552	35	Yes	18S-rR0	9	2	0	311	86	105
ATCCTTCGATGTCGGCT	-0.867336729379961	8.68547852042342e-07	0.000675902482792559	17	Yes	28S-rR0	23719	16477	4645	6416	3620	9128
ATTAGTGACGCGCATGAATGGAT	-1.20890633355732	3.1843272775213e-06	0.0020425341419549	23	Yes	28S-rR0	5980	7215	6491	2743	2564	2028
AAACGGGGTGCGGCCGG	-1.3532875946317	7.1861435546446e-06	0.00411515655417515	17	Yes	28S-rR0	12216	2213	390	1754	321	2309
AATCGGTCGTCCGACCTGGGTATAGGGGC	-1.45843435132017	1.94198425496378e-05	0.00942873347345058	29	Yes	28S-rR0	3834	4118	2868	1861	809	709
AGGGCGCCCTGGAAT	-1.48161480401931	1.155670886349e-07	0.000112969870379789	15	Yes	28S-rR0	5308	5816	6444	1218	909	2851
TTCGATGTCGGCTCTTCCTATC	-1.96608534190688	0.000139622786049264	0.046640539663543	22	Yes	28S-rR0	1305	1436	1302	401	255	913
AAGCGTTGGATTGTTCACCC	-2.18494382601787	6.56993049156106e-06	0.0038092607394307	20	Yes	28S-rR0	1567	2330	1184	416	262	262
AGCGTTGGATTGTTCACC	-2.34332797591649	2.65213457549633e-15	8.54186626659422e-12	18	Yes	28S-rR0	7452	6967	4468	1073	1289	1032
TGCCCAGTGCTCTGAATGTC	-2.38695064987665	2.68714783400048e-05	0.0123739826580721	20	Yes	28S-rR0	709	1687	1043	213	253	10332
GCCCAGTGCTCTGAATGTC	-2.39484984792171	0.000129006940624709	0.0440179897407726	19	Yes	28S-rR0	599	1342	708	159	118	0
TTCTGATCGAGGCCC	-2.51938795302427	5.70139306910569e-06	0.0034048866068328	15	Yes	28S-rR0	1140	1806	868	166	231	167
CGCGTCGGGGTCGGGGC	-2.58416047276237	1.38763499104553e-05	0.0071656750756317	17	Yes	28S-rR0	749	654	1648	209	112	126
CGTAAGGGAAAGTTGAAAAGA	-2.75335892459929	5.14579810640279e-06	0.00312329765458232	21	Yes	28S-rR0	565	1643	939	208	64	117
ACCATCTGTGGGATTATGACTGAACGCC	-2.91445845047269	8.47429199217696e-06	0.00475029251018217	28	Yes	28S-rR0	832	1029	727	126	97	72
TTCTGATCGAGGCCCAGCC	-2.93406761732613	3.06363970699273e-05	0.0137441981347768	19	Yes	28S-rR0	627	1038	455	42	100	0
TCCCGTGGAGCAGAA	-2.94417661636644	3.73227916401225e-07	0.000322274010526159	15	Yes	28S-rR0	1852	1260	619	192	95	115
GATGTCGGCTCTTCCTATC	-3.00887506917392	4.74110659309106e-06	0.00290615751661651	19	Yes	28S-rR0	715	1344	573	165	79	40
GCGTCGGGGTCGGGGC	-3.0159323916858	2.7165736512546e-05	0.0124477604666328	16	Yes	28S-rR0	449	263	1187	68	98	3261
ATTCAATGAAGCGCGGGTAAACGGC	-3.05807343251406	2.22077583419821e-05	0.01050419428741	25	Yes	28S-rR0	403	999	596	126	57	28
ACCATCTGTGGGATTATGACTGAA	-3.28687716051263	7.04331156037915e-05	0.0272257474525026	24	Yes	28S-rR0	483	549	336	58	15	376
TGGTGCGGACCAGGGGAATCC	-3.30471058644034	4.28412883024849e-06	0.00267010485785924	21	Yes	28S-rR0	713	465	894	131	32	24
CGCAGCAGGTCTCCAAGGTGAAC	-3.75246800089638	9.20468092112972e-06	0.0050931044314243	23	Yes	28S-rR0	346	445	572	53	20	16
CGCGCGGGCGGGGCCGGGG	-4.05492535444216	1.21668672497565e-05	0.00640761508779945	19	Yes	28S-rR0	128	300	647	17	7	29
CCGCAGCAGGTCTCCAAGGTGAA	-4.19959142409079	1.06824841526568e-05	0.0057564539120105	23	Yes	28S-rR0	428	326	304	24	13	12
GCTCCCTCGCTGCGATCTATTGAAAGTC	-4.23568456243133	3.09429496877443e-05	0.0138705568274451	28	Yes	28S-rR0	306	415	168	37	0	18848
CATCTGTGGGATTATGACTGAACGCC	-4.28701374935124	5.2990038293719e-05	0.0215583257942382	26	Yes	28S-rR0	349	306	130	17	14	0
TACCATCTGTGGGATTATGACTGAACGCC	-4.93109209054658	1.14035827496299e-05	0.00609112282470479	29	Yes	28S-rR0	396	280	77	0	0	17
AGCTCCCTCGCTGCGATCTATTGAAAGTC	-5.52313456117064	2.58211766183586e-06	0.0017107373840646	29	Yes	28S-rR0	190	356	173	0	0	11
GGGCCGCCCTCTCGCCCGTCACGTTGAACGC	-8.82727895992125	0.000151077722072942	0.049721793243841	31	Yes	28S-rR0	141	33	14	0	0	70
GGAGTCGGGTTGCTTGGG	-8.8427913607523	0.000141091709889667	0.0469622997810176	18	Yes	28S-rR0	8	35	130	0	0	701
AATTCACCAAGCGTTGGATTGTTCACCCA	-8.9390110584214	9.09990611169769e-05	0.0336403761180882	29	Yes	28S-rR0	105	49	45	0	0	437
TCAATGAAGCGCGGGTAAACGGC	-8.94430999619774	8.87614416719431e-05	0.0329493588842039	23	Yes	28S-rR0	54	132	19	0	0	2700
CATGTTGGAACAATGTAGGT	-8.95183064575653	8.5624500549941e-05	0.0320625775950414	20	Yes	28S-rR0	0	125	73	0	0	4012
TGAACAGCAGTTGAACATGGGT	-8.97771547128428	7.55832705003537e-05	0.0288256279877427	22	Yes	28S-rR0	26	44	123	0	0	146
GGTGTCCTAAGGCGAGCTCAGGGAGGACAGA	-9.0530606354547	5.19281346847123e-05	0.0212124907367851	31	Yes	28S-rR0	105	51	58	0	0	526
CGCGGGTAAACGGCGGGAGTAACTATGAC	-9.06860336610625	4.79405150087594e-05	0.0199343101177095	29	Yes	28S-rR0	74	113	34	0	0	163
CTCGCTGCGATCTATTGAAAGTCAGCCCTCGACACAAGGGTT	1.45940058303298	9.89790087834745e-06	0.00539629294560315	42	Yes	28S-rR0	2257	1705	426	4262	2985	2749
AAGGGGGCCGCCCTCTCGCCCGTCACGTTGAACG	1.51244934006527	4.80107998092713e-05	0.0199357754070634	34	Yes	28S-rR0	2720	313	136	2851	555	525
CTCGCTGCGATCTATTGAAAGTCAGCCCTCGACACAAGGGT	1.66619514499654	0.000121484292524396	0.0421647196925798	41	Yes	28S-rR0	1083	700	179	2330	1529	3516
AACGATCTCAACCTATTCTCAAACTTT	1.98062542491982	6.37341382469428e-05	0.025096837095275	27	Yes	28S-rR0	610	342	215	1924	1371	336
ATCCTTCGATGTCGGCTCTTCCTATCA	2.0088040528031	8.40185300211634e-07	0.000654745241153735	27	Yes	28S-rR0	825	869	276	3711	2477	758
AAGGGGGCCGCCCTCTCGCCCGTCACGTTGAAC	2.08965654266436	2.01162205464578e-06	0.0013854829327912	33	Yes	28S-rR0	1299	144	111	2309	560	2290
TTAAGCAGGAGGTGTCAGAAAA	2.18738398574689	7.44210772914144e-06	0.00423994683599215	22	Yes	28S-rR0	446	431	222	1205	1419	1510
AGAGAGAGTTCAAGAGGGCGTGAAACCGTTAAGAGGT	2.33234436537561	3.72187038289107e-05	0.0162522645661683	37	Yes	28S-rR0	151	194	320	747	1895	402
ACGGGCTTGGCGGAATC	2.36815422408915	0.000104543593028761	0.0375810610320614	17	Yes	28S-rR0	290	125	131	977	332	8026
ATTAGTGACGCGCATGAATGGATGAACGAGATT	2.37409362455758	1.93560326886496e-05	0.00941098416560966	33	Yes	28S-rR0	241	144	302	951	776	1257
AACGATCTCAACCTATTCTCAAACTTTA	2.51348137414527	4.00191641397002e-05	0.017178950744992	28	Yes	28S-rR0	249	190	75	1117	1058	431
ATTAGTGACGCGCATGAATGGATGAACGAGATTCCCA	2.55789858041353	4.83186593654486e-06	0.00294881421816367	37	Yes	28S-rR0	252	164	211	616	1235	1252
AACGATCTCAACCTATTCTCAAACTTTAA	2.63968235259993	1.72370301679926e-05	0.00855998292273068	29	Yes	28S-rR0	193	255	37	877	1361	399
TGACCTTTTGGGTTTTAAGCAGGAGGT	2.79719650924672	3.1805562045326e-06	0.0020425341419549	27	Yes	28S-rR0	54	207	194	653	644	1286
GCGGGTGTTGACGCGATGTG	2.90673625644998	3.54216181946749e-11	6.852976195101e-08	20	Yes	28S-rR0	833	212	19	2325	533	0
GCCCGAGGTGGGATCCCGAGGCCTCT	3.03836371418034	1.45920893452012e-07	0.000139460827825946	26	Yes	28S-rR0	191	137	129	938	798	1328
CGCTGCGATCTATTGAAAGTCAGCCCTCGACACAAGGGTTT	3.16596418783362	4.21875741279805e-05	0.0179028898921321	41	Yes	28S-rR0	62	92	32	528	527	7624
TGACCTTTTGGGTTTTAAGCAGGAGGTGTCAGAAAAGTT	3.24390236414156	1.43523807811772e-05	0.00735018662450746	39	Yes	28S-rR0	13	97	82	150	807	611
ACCTCCCGTGGAGCAGAAGGGCAAAAGCTCGCTTGATCTTGAT	3.25040237785192	1.28520556758252e-05	0.00668630896546501	43	Yes	28S-rR0	102	57	40	498	834	334
AGGAGTCTAACGCGTGCGCGAGTCAGGGGCT	3.34390774329991	0.000118389361505269	0.0413786476609981	31	Yes	28S-rR0	40	63	16	430	200	1131
GAGAGAGTTCAAGAGGGCGTGAAACCGTTAAGAG	3.37528326313504	0.000109408513843527	0.0389280522531769	34	Yes	28S-rR0	38	50	26	375	445	0
ACGGGCTTGGCGGAATCAGCGG	3.65791279749398	1.99056813351524e-06	0.00137437999790998	22	Yes	28S-rR0	69	60	20	599	73	766
AACCTCCCGTGGAGCAGAAGGGCAAAAGCTCGCTTGATCTTGATT	3.87752121831091	6.51088442028815e-05	0.0255119528139266	45	Yes	28S-rR0	26	16	21	354	186	15503
TTCTGGGTCGGGGTTTCGTACGTAGCAGAGCAGCTCC	3.87956069879271	0.000129343776415667	0.0440519919199545	37	Yes	28S-rR0	24	21	11	291	182	817
ACGACCTGCTTCTGGGTCGGGGTTTCGTACGTAGCAGAGCAGC	3.88776053031658	5.27076078169011e-06	0.00318526594354654	43	Yes	28S-rR0	39	42	14	505	322	343
ATCCTTCGATGTCGGCTCTTCCTATCATTGTGAAGCAGAATT	3.93267803058643	4.85391173923378e-06	0.00295902744199526	42	Yes	28S-rR0	45	36	10	262	514	384
AACTTTGAAGGCCGAAGTGGAGAAGGGTTCCATGTGAAC	3.95047776993129	3.42721779913492e-05	0.0152160277729082	39	Yes	28S-rR0	33	16	16	483	290	143
ACGGGCTTGGCGGAATCAGCGGGGAAAGAA	3.95800782166284	5.87816984264907e-05	0.0235799672759225	30	Yes	28S-rR0	24	1	31	319	230	51
AGTGCCAGGTGGGGAGTTTGACTGGGGCGGTACACCTGTC	4.11693689871374	5.57555452518603e-05	0.0224630746629675	40	Yes	28S-rR0	20	15	13	507	145	838
ACGGGCTTGGCGGAATCAGCGGGGAAAGAAGACCCTG	4.21301407659409	5.69781753119715e-06	0.0034048866068328	37	Yes	28S-rR0	41	9	12	318	383	282
GAGCACGAGCGTACGCGTTAGGACCCGAAAGATGGTG	4.39551872390801	8.73834902485689e-06	0.00487379448764766	37	Yes	28S-rR0	9	14	22	352	259	227
AACTTTGAAGGCCGAAGTGGAGAAGGGTTCCATGTGAA	4.41414664065344	1.07200892165315e-06	0.000810464926805862	38	Yes	28S-rR0	13	23	23	710	296	130
GAGAACTTTGAAGGCCGAAGTGGAGAAGGGTTCCATGTGAAC	4.48109014196156	2.4702962966938e-06	0.00165141053810276	42	Yes	28S-rR0	15	22	13	582	243	154
ACGGGCTTGGCGGAATCAGCGGGGAAAGAAGACCCTGT	4.53025658596186	3.75523970182951e-06	0.00238041184239179	38	Yes	28S-rR0	17	12	15	260	412	229
ATCGAACCATCTAGTAGCTGGTTCCCTCCGAAGTTTCCCT	4.56997057007887	0.000120383460046964	0.0419490056932881	40	Yes	28S-rR0	7	4	12	249	95	0
GAGAGAGTTCAAGAGGGCGTGAAACCGTTAAGAGG	4.65588192996028	6.58820404877443e-07	0.000523663539791244	35	Yes	28S-rR0	22	15	11	491	365	204
AAACCTCCCGTGGAGCAGAAGGGCAAAAGCTCGCTTGATCTTGA	4.6670881222789	3.89015408453486e-06	0.00245476212272025	44	Yes	28S-rR0	6	16	15	289	336	210
TTAGTGACGCGCATGAATGGATGAACGAGATTCCCACTG	4.70425063240001	0.000126350955400486	0.0434411771679387	39	Yes	28S-rR0	3	18	0	132	220	485
ACGGGCTTGGCGGAATCAGCGGGGAAAGAAGACCCTGTT	4.8165008542408	2.62224361529812e-07	0.000234901594856585	39	Yes	28S-rR0	17	15	12	388	391	293
AACTTTGAAGGCCGAAGTGGAGAAGGGTTCCATGTG	4.81701938208208	1.60591534323069e-05	0.00805400513136553	36	Yes	28S-rR0	11	6	8	304	269	75
AACGATCTCAACCTAT	4.84096227114469	2.38372526421829e-07	0.000217290216418192	16	Yes	28S-rR0	17	28	0	297	363	383
GAGCACGAGCGTACGCGTTAGGACCCGAAAGATGGT	4.85366741094366	1.28105460698766e-05	0.00667718256751594	36	Yes	28S-rR0	10	16	0	343	153	135
AAACCACAGCCAAGGGAACGGGCTTGGCGGAATCAGCGGGGAAA	4.96461847910183	0.000132658118412961	0.0449063043733402	44	Yes	28S-rR0	3	9	3	200	114	540
GGGGAGGTGGAGCACGAGCGTACGCGTTAGGACC	4.99439646280297	1.85125741003239e-07	0.00017307082488187	34	Yes	28S-rR0	5	34	0	656	211	174
GTGCCAGGTGGGGAGTTTGACTGGGGCGGTACACCTGT	5.08914851447245	2.4549509716895e-05	0.0114558279088678	38	Yes	28S-rR0	4	6	7	350	52	108
GAGGTGGAGCACGAGCGTACGCGTTAGGACC	5.13406691258861	3.76450679498632e-05	0.0163998869515123	31	Yes	28S-rR0	0	16	0	275	141	0
ACGGGCTTGGCGGAATCAGCGGGGAAAGAAGAC	5.34960619912957	1.17389976097882e-05	0.00622938293161702	33	Yes	28S-rR0	7	8	0	255	152	116
TTAAGCAGGAGGTGTCAGAAAAGTTACCACAGGGATAACTGGCT	5.76573149759326	8.43674155614372e-06	0.00473400607015883	44	Yes	28S-rR0	9	1	0	157	308	45
GCGCCGGGGAGGTGGAGCACGAGCGTACGCGTTAGGACCCGAAAG	5.80399611058913	3.77843305583694e-06	0.00238967663380452	45	Yes	28S-rR0	0	3	7	230	171	123
ATTAGTGACGCGCATGAATGGATGAACGAGATTCCCACTGTCCCT	6.21765744799405	6.68348949466721e-09	8.64030977153972e-06	45	Yes	28S-rR0	8	4	2	410	217	66
GTTCGAGGCCAGCCTGGGCTACACATTTT	-10.5583558299388	4.56087468491311e-10	7.28158672116543e-07	29	Yes	4.5S-rR0	78	35	451	0	0	482
CCAGCCTGGGCTACACATTT	-5.09544258910064	3.69665333130874e-07	0.000319835135042223	20	Yes	4.5S-rR0	218	387	452	9	0	15
GTAGTGGTGGCGCACGCCGGTAGGATTT	-8.89140669243756	0.000113463521739724	0.0401146825369015	28	Yes	4.5S-rR0	39	37	107	0	0	949
ATCGATGTGGTGCTCCGGAGTTCTCTTCGGGCCAGGG	-2.70620168653726	0.000117250514317811	0.0411403111289303	37	Yes	45S-rR0	1035	693	314	127	76	710
TCGATGTGGTGCTCCGGAGTTCTCTTCGGGCCAGGG	-8.89373105504796	0.000112302051905046	0.0397797713292898	36	Yes	45S-rR0	89	74	32	0	0	470
TCTCGTCTGATCTCGGAAGCTAAGCAGGG	-4.89073717699139	2.30448769000296e-05	0.0108357594598544	29	Yes	5S-rR0	120	132	381	1	0	15
TACTTGGATGGGAGACCGCCTGGGAATACCGGGTGCTGTAGGCTT	4.73924025501612	2.8740868786358e-06	0.00187959209848249	45	Yes	5S-rR0	2	23	11	200	508	164
CACTAATTTTTTGAGGCCTTGCTTTAGCAAGGCT	-8.92898113425452	9.5380487947394e-05	0.034906342610291	34	Yes	antisense;snR0	30	83	80	0	0	666
GGCTTTGGTGACTCTAGAT	-3.4145071798477	1.42344582563518e-05	0.00730995188558218	19	Yes	D0;mR0;rR0	605	801	268	24	59	47
TACCTGGTTGATCCTGCCAGTAGCATATGCTTGTCTCAAAGAT	1.92766400183384	1.90825492942763e-06	0.00132576130190496	43	Yes	D0;mR0;rR0	745	619	663	1660	3067	1966
AACTATGTGGTCACACTGTTGTCTGAGGCA	-9.10536011230794	3.95054785577498e-05	0.0170240197970554	30	Yes	D0;snoR0;other	36	63	115	0	0	196
TAGACTGGATGCCCTGAAGACAGACTTTGT	-8.98391022793701	7.33428004006913e-05	0.0281107020544559	30	Yes	lincR0	70	13	112	0	0	170
AAGGAATTGACGGAAGGGCACCACCAGGAGTGGAGCCTGCGGCT	5.35924045318481	4.31456884988829e-06	0.00268307434985408	44	Yes	lincR0	13	4	0	256	148	178
GCCTCTGCCTCTGCCTC	-8.98033530181548	7.46365177414046e-05	0.0285427050928849	17	Yes	lincR0;processed_transcript;antisense	30	66	101	0	0	421
TAGGATAAGGTGTTTAGGTAGCACGGAGAATTTTGAATTCTTAAG	6.90699882638944	8.84280287117477e-27	6.65827206998631e-23	45	Yes	mature-mt_tR0-Gln-TTG_5_end	9	10	22	1231	1230	2371
TCATGTCATTGGTCGCAGTTGAATGCTGTGTAGAAATA	4.62669810939566	1.02945933205435e-06	0.000781477445813846	38	Yes	mature-mt_tR0-Glu-TTC_3_end	30	14	4	330	338	317
GATTTTTCATGTCATTGGTCGCAGTTGAATGCTGTGTAGAAATA	4.71810525140181	1.22898105800795e-05	0.00645406178804382	44	Yes	mature-mt_tR0-Glu-TTC_3_end	10	14	6	293	247	148
AATTAGTAGATTCTGAATAAACCCAGAAGAGAGTA	3.46307109797523	1.43438372636277e-05	0.00735018662450746	35	Yes	mature-mt_tR0-Gly-TCC_3_end	47	92	9	376	632	363
GACTTCCAATTAGTAGATTCTGAATAAACCCAGAAGAGAGTA	5.30370371514147	1.56687249203383e-06	0.00112942520548037	42	Yes	mature-mt_tR0-Gly-TCC_3_end	8	12	1	273	211	209
TGAATCTGACAACAGGAAATAAACCTCCT	2.10209758059062	3.04771007986168e-06	0.00197741961771128	29	Yes	mature-mt_tR0-His-GTG	282	878	274	727	3482	1210
TGAATCTGACAACAGGAAATAAACCTCCTTAT	3.85406111814266	4.19334266871932e-06	0.0026252680916671	32	Yes	mature-mt_tR0-His-GTG	31	49	22	220	670	379
AGAAATATGTCTGATAAAAGAATTACTTTGATAGAGTAAATT	4.81620691236508	1.90297149115873e-06	0.00132374117997345	42	Yes	mature-mt_tR0-Ile-GAT_5_end	1	17	16	179	484	211
AGAAATATGTCTGATAAAAGAATTACTTTGATAGAGTAAAT	6.00111311278431	1.37137375044669e-06	0.00100806825859023	41	Yes	mature-mt_tR0-Ile-GAT_5_end	0	10	0	107	292	159
CACTATGAAGCTAAGAGCGTTAACCTT	-1.59755490902181	2.55849376574416e-05	0.0118698346489175	27	Yes	mature-mt_tR0-Lys-TTT_5_end	2191	3968	2369	320	1543	4
CACTATGAAGCTAAGAG	-4.46515279438194	5.80033621328828e-07	0.00046997203001666	17	Yes	mature-mt_tR0-Lys-TTT_5_end	194	464	648	32	24	0
AGTAAGGTCAGCTAATTAAGCTATCGGGCCCATACCCCGAAAACG	3.81760750846404	1.14626012975691e-07	0.000112246868488445	45	Yes	mature-mt_tR0-Met-CAT_5_end	34	40	85	517	619	786
AAGAAAGATTGCAAGAACTGCT	-1.61147924645569	1.94263824324221e-05	0.00942873347345058	22	Yes	mature-mt_tR0-Ser-GCT_5_end	667	2980	4687	697	1018	718
AAGAAAGATTGCAAGAACT	-2.17113924438983	1.3980017253728e-07	0.0001345341245873	19	Yes	mature-mt_tR0-Ser-GCT_5_end	852	3047	3698	611	528	360
AAGAAAGATTGCAAGAACTGC	-4.02668510090157	2.27377384965516e-05	0.0107094171706624	21	Yes	mature-mt_tR0-Ser-GCT_5_end	48	336	604	18	31	8
AAGAAAGATTGCAAGA	-4.93513838853777	1.33366559424918e-07	0.000128787717930624	16	Yes	mature-mt_tR0-Ser-GCT_5_end	93	190	910	2	26	9
GGTAAAATGGCTGAGT	-5.38292739559619	0.000127684761847775	0.0437544111032976	16	Yes	mature-mt_tR0-Tyr-GTA_5_end	22	110	260	0	0	4393
CTAGTGGTTAGGATTCGG	-4.47023230900481	0.000115507690269982	0.0406568098177708	18	Yes	mature-tR0-Ala-CGC;mature-tR0-Glu-CTC	325	149	140	3	0	14
AAGCCAGGGATTGTGGGT	-3.76519846638136	2.17664768395535e-06	0.00148264831665414	18	Yes	mature-tR0-Arg-CCT	742	630	352	11	72	28
CTAAGCCAGGGATTGTGGG	-9.05916831766277	5.0324883187001e-05	0.0207093956151884	19	Yes	mature-tR0-Arg-CCT	64	89	62	0	0	1598
CTGTCACGCGGGAGA	-3.14214421031081	6.48927061974701e-05	0.0254451562042001	15	Yes	mature-tR0-Asp-GTC	298	442	760	37	56	612
GAGTATCCCCGCCTG	-4.8055889526856	0.000113926626764382	0.0402273619561763	15	Yes	mature-tR0-Asp-GTC	249	72	196	15	0	0
TCACGCGGGAGACCGGGGTTCGATTCCCCGACGGGG	0.94915606263829	2.70895065216126e-06	0.00178627244245885	36	Yes	mature-tR0-Asp-GTC	10205	4056	2996	12003	8378	7624
ACGCGGGAGACCGGGGTTCGATTCCCCGACGGGG	1.21245224215036	7.37963475857311e-06	0.00421296997041941	34	Yes	mature-tR0-Asp-GTC	3455	2511	1836	6648	5286	3606
CACGCGGGAGACCGGGGTTCGATTCCCCGACGGG	1.21626943161343	1.00747035251936e-05	0.00548731579394193	34	Yes	mature-tR0-Asp-GTC	4724	1479	1305	5069	6408	3538
TCACGCGGGAGACCGGGGTTCGATTCCCCGACGGGGA	1.77100398516168	0.000139610418824202	0.046640539663543	37	Yes	mature-tR0-Asp-GTC	686	673	179	1955	1209	936
CACGCGGGAGACCGGGGTTCGATTCCCCGACGGGGA	2.0296354684992	1.57512693027794e-06	0.0011339082355059	36	Yes	mature-tR0-Asp-GTC	895	695	189	2575	2100	1442
CACGCGGGAGACCGGGGTTCGATTCCCCGACGG	2.09898132546505	7.58224537486286e-06	0.00430657624915376	33	Yes	mature-tR0-Asp-GTC	797	336	156	1370	2391	1018
ACGCGGGAGACCGGGGTTCGATTCCCCGACG	2.43626831054853	3.59892858287034e-07	0.000313326096420238	31	Yes	mature-tR0-Asp-GTC	298	546	189	1925	1516	1260
CACGCGGGAGACCGGGGTTCGATTCCCCGACG	2.69901496333491	1.2043036754773e-07	0.000117142651066025	32	Yes	mature-tR0-Asp-GTC	451	211	109	1318	1902	1060
TCCTCGTTAGTATAGTGGTTAGTATCCCCGCCTG	1.88160146947271	0.000126693454010532	0.043494963425834	34	Yes	mature-tR0-Asp-GTC_5_end	491	286	441	1094	1211	0
ATCAAGAGGTCCCCGGTT	-3.14184877080954	5.94849516814168e-05	0.0237764850985428	18	Yes	mature-tR0-Cys-GCA	719	501	366	84	36	2076
TCCGGGTGCCCCCTCC	-3.22423933016305	7.62272407225728e-05	0.0289918472752289	16	Yes	mature-tR0-Cys-GCA	555	825	80	46	17	17481
TCAAGAGGTCCCCGG	-8.88614729463759	0.000116212977894278	0.0408792355763337	15	Yes	mature-tR0-Cys-GCA	35	38	109	0	0	4540
GGGGGTATAGCTCAGTGGT	-8.96685216205864	7.96704439792194e-05	0.0299740544772325	19	Yes	mature-tR0-Cys-GCA_5_end	11	88	97	0	0	60
TCCGGGTGCCCCCTCCA	-3.37025424180466	5.41667876144692e-09	7.16892930900382e-06	17	Yes	mature-tR0-Cys-GCA_CCA_end	1637	1833	626	66	70	226
TCTCGGTGGAACCTCCA	-3.89930506238137	1.65519114811516e-05	0.00827135386384113	17	Yes	mature-tR0-Gln-CTG_CCA_end	335	687	178	4	14	42
ATCCAGCGATCCGAGTT	-2.4685307011719	6.51535630348495e-07	0.00051861305410554	17	Yes	mature-tR0-Gln-CTG;mature-tR0-Gln-TTG	2629	965	1429	290	244	236
ATCCAGCGATCCGAGT	-2.3417309737749	0.000128879442315657	0.0440179897407726	16	Yes	mature-tR0-Gln-TTG;mature-tR0-Gln-CTG	1527	850	449	160	152	1003
CCCTGGTGGTCTAGTGGTTAGGATTCGG	-1.86886132589322	1.48649384258082e-07	0.000141804986017096	28	Yes	mature-tR0-Glu-CTC	6514	2482	1889	648	772	1001
TCTAGTGGTTAGGATTCGGCGCTCT	-9.0607488782763	4.99108879288252e-05	0.020615157631625	25	Yes	mature-tR0-Glu-CTC	97	37	78	0	0	421
TCCCTGGTGGTCTAGTGGTTAGGATTCGGC	-1.09009910631	3.90869810295564e-70	8.06624998513279e-66	30	Yes	mature-tR0-Glu-CTC_5_end	216207	105605	118300	34681	57423	253
TCCCTGGTGGTCTAGTGGTTAGGATTC	-1.47173523628097	8.50794190596346e-06	0.00476436196038571	27	Yes	mature-tR0-Glu-CTC_5_end	6633	3655	1691	512	1388	1580
TCCCTGGTGGTCTAGTGGTTAGGAT	-1.66302852599175	2.59535020622394e-05	0.0120108237658299	25	Yes	mature-tR0-Glu-CTC_5_end	4623	2403	919	399	854	7154
TCCCTGGTGGTCTAGTGGTTAGGA	-3.12254199048193	2.42801008740419e-07	0.000220335983811196	24	Yes	mature-tR0-Glu-CTC_5_end	2074	1021	365	95	98	127
TCCCTGGTGGTCTAGTGGTTAGGATTCGGCGCTC	0.490517400922188	2.74699551798636e-07	0.000244895749226691	34	Yes	mature-tR0-Glu-CTC_5_end	29470	25541	47442	23045	47067	52127
TCCCTGGTGGTCTAGTGGTTAGGATTCGGCGCTCTCAC	2.972543572786	0.000110672302434446	0.039252387137778	38	Yes	mature-tR0-Glu-CTC_5_end	79	61	63	504	703	3
GTGGTTAGGATTCGG	-4.988569354937	6.89058762848632e-05	0.0267365356595842	15	Yes	mature-tR0-Glu-CTC;mature-tR0-Ala-CGC	324	238	0	0	0	24063
GGCGGCCCGGGTTCGACTCC	-4.68555885070061	6.30625665296542e-06	0.00367278926449759	20	Yes	mature-tR0-Glu-TTC	447	384	93	8	3	16
CCGCCGCGGCCCGGGTT	-2.61415122547632	4.81034452940802e-06	0.00293889897844392	17	Yes	mature-tR0-Glu-TTC;mature-tR0-Glu-CTC	2056	791	743	123	144	208
TCTTGCGACCCGGGT	-2.74063417151416	2.76871581441874e-06	0.00181494207604233	15	Yes	mature-tR0-Gly-CCC	1827	1204	476	85	155	183
TTCTTGCGACCCGGG	-2.8666366967843	0.00010765543112212	0.0384516215813679	15	Yes	mature-tR0-Gly-CCC	1059	418	316	100	35	86
ATTCTTGCGACCCGGG	-4.00553612334315	5.25542514547438e-06	0.00317944661976859	16	Yes	mature-tR0-Gly-CCC	800	326	200	0	0	57
TCCCGGCCAATGCACCA	-2.88758735526299	5.7164256252176e-05	0.0229807734063131	17	Yes	mature-tR0-Gly-CCC_CCA_end;mature-tR0-Gly-GCC_CCA_end	976	689	325	98	39	259
CATTGGTGGTTCAGTGGTAGAATTCTCG	-1.74653016577252	3.12191666397683e-06	0.00201798230394576	28	Yes	mature-tR0-Gly-GCC	5964	1493	1762	538	872	864
TTGGTGGTTCAGTGGTAGAATTCTCGC	-2.25769080564751	0.000133492252438606	0.0449973067974997	27	Yes	mature-tR0-Gly-GCC	1376	801	826	81	141	14
ATTGGTGGTTCAGTGGTAGAATTCTC	-3.29983344190048	7.25994677055549e-06	0.00415315168489303	26	Yes	mature-tR0-Gly-GCC	580	894	512	33	91	50
TTGGTGGTTCAGTGGTAGAATTCTCG	-3.32306258165256	7.24999884959003e-08	7.39858399084811e-05	26	Yes	mature-tR0-Gly-GCC	2100	650	606	39	146	106
GTGGTTCAGTGGTAGAATTCTCGCCTGC	-6.59704506868974	0.000121887863382106	0.0422190501501566	28	Yes	mature-tR0-Gly-GCC	30	70	175	0	0	808
GTTCAGTGGTAGAATTCTCGCCTGCC	-8.83492892359891	0.000146069569766192	0.0482896281851218	26	Yes	mature-tR0-Gly-GCC	15	63	99	0	0	711
ACGCGGGAGGCCCGG	-9.10169811628045	4.02979226835548e-05	0.0172852960277521	15	Yes	mature-tR0-Gly-GCC	81	89	53	0	0	60
CACGCGGGAGGCCCGGGTTCGGTTCCCGGCCAATG	2.91867612548307	1.17655616434222e-05	0.00623408119434979	35	Yes	mature-tR0-Gly-GCC	118	111	95	770	913	469
CCACGCGGGAGGCCCGGGTTCGGTTCCCGGCCAATG	3.34273563934924	2.23397970399902e-07	0.000205066087524088	36	Yes	mature-tR0-Gly-GCC	161	106	29	913	1035	600
CCACGCGGGAGGCCCGGGTTCGATTCCCGGCCAATG	3.43412583808457	1.82883363450969e-05	0.00900183580223017	36	Yes	mature-tR0-Gly-GCC	43	66	35	587	399	340
GCATTGGTGGTTCAGTGGTAGA	-2.28210040758509	2.99177420218592e-05	0.0134651588668496	22	Yes	mature-tR0-Gly-GCC_5_end	2300	961	551	167	141	589
GCATTGGTGGTTCAGTGGTAGAATTCTCGC	0.301267665864097	7.7591611338663e-08	7.81949736080432e-05	30	Yes	mature-tR0-Gly-GCC_5_end	142701	115018	87384	71824	141384	1038
GCATTGGTGGTTCAGTGGTAGAATTCTCGCCTGC	1.29596801071929	1.69980195455724e-06	0.00120497792755693	34	Yes	mature-tR0-Gly-GCC_5_end	1033	2244	3908	2432	6050	6631
GCATTGGTGGTTCAGTGGTAGAATTCTCGCCT	1.37761604780816	4.01052592654646e-56	7.20846755165297e-52	32	Yes	mature-tR0-Gly-GCC_5_end	22977	37102	27578	33981	94973	10910
GCATGGGTGGTTCAGTGGTAGAATTCTCGCCT	2.02457701949682	3.90945248339349e-05	0.0168730273371187	32	Yes	mature-tR0-Gly-GCC_5_end	258	528	358	751	1899	1040
GCATTGGTGGTTCAGTGGTAGAATTCTCGCCTGCCA	3.46882841371867	8.98542893059335e-05	0.03333283053154	36	Yes	mature-tR0-Gly-GCC_5_end	33	54	18	119	659	0
GCATTGGTGGTTCAGTGGTAGAATTCTCGCCTGCCAC	4.20285129801316	6.59635681028954e-05	0.0257743622098543	37	Yes	mature-tR0-Gly-GCC_5_end	15	18	9	160	343	4623
TTCCCGGCCAATGCACCA	-2.33803141966199	0.000125450199969605	0.043254701065015	18	Yes	mature-tR0-Gly-GCC_CCA_end;mature-tR0-Gly-CCC_CCA_end	1186	1096	557	77	217	0
CCTTCCAAGCAGTTGACCCGGGT	-2.5889329533094	0.000114403308181149	0.0403445438515534	23	Yes	mature-tR0-Gly-TCC	980	1112	217	42	195	72
CAGTTGACCCGGGTTCG	-8.90941750772985	0.00010450405101921	0.0375810610320614	17	Yes	mature-tR0-Gly-TCC	102	91	8	0	0	362
GCGTTGGTGGTATAGTGGT	-2.69442730107088	1.42309056692772e-07	0.000136712384997665	19	Yes	mature-tR0-Gly-TCC_5_end	964	1418	2331	126	140	327
GCCGTGATCGTATAGTGGTTAGTACTCTGCGTTG	2.70257834724906	7.46850620646853e-06	0.00425064042204515	34	Yes	mature-tR0-His-GTG	118	227	135	943	1164	620
GCCCATAACCCAGAGGTCGATG	-2.88558334090637	5.01266545113103e-05	0.020643067721476	22	Yes	mature-tR0-iMet-CAT	416	1244	382	74	70	0
GCGGAAGCGTGCTGGGCC	-4.06999367828606	6.0054754703665e-05	0.0239698486915008	18	Yes	mature-tR0-iMet-CAT	554	141	168	3	20	2394
AGCAGAGTGGCGCAGCGGAAGCGTGCTGGGCC	2.56314368521522	0.000107412604488084	0.0383894990985988	32	Yes	mature-tR0-iMet-CAT_5_end	43	183	160	506	808	2356
AGCAGAGTGGCGCAGCGGAAGCGTGCTGGGCCCATAACCCAGA	4.34753041703131	2.82788972805899e-06	0.0018515533226524	43	Yes	mature-tR0-iMet-CAT_5_end	28	11	18	174	635	239
AGCAGAGTGGCGCAGCGGAAGCGTGCTGGGCCCATAACCCAGAGG	4.81588013907619	0.000130255515830212	0.0443083460716946	45	Yes	mature-tR0-iMet-CAT_5_end	2	5	10	81	288	0
AGCAGAGTGGCGCAGCGGAAGCGTGCTGGGCCCATAACCCAGAG	4.87377109802706	4.70895336616894e-06	0.00289237597537375	44	Yes	mature-tR0-iMet-CAT_5_end	4	11	13	104	572	111
CCATCCTCTGCTACCA	-1.28431080751962	3.9951937589231e-05	0.0171633154243204	16	Yes	mature-tR0-iMet-CAT_CCA_end	4812	7138	1307	1028	2345	0
GGTAGCGTGGCCGAGCG	-1.5251244320482	7.2832976907306e-06	0.00416223655415198	17	Yes	mature-tR0-Leu-AAG_5_end;mature-tR0-Leu-TAG_5_end	5462	3458	2284	806	1052	1317
GGTAGTGTGGCCGAGCGGTCT	-2.66155639403963	1.27286668770945e-06	0.000941870637084768	21	Yes	mature-tR0-Leu-AAG_5_end;mature-tR0-Leu-TAG_5_end	642	704	2448	144	224	171
CGAGCGGTCTAAGGC	-2.36814188537056	1.01041165134274e-05	0.00549796160167635	15	Yes	mature-tR0-Leu-AAG;mature-tR0-Leu-TAG;mature-tR0-Leu-CAG	1275	2430	431	156	349	175
CGTATGGAGGCGTGGGT	-1.70003473575987	7.14241601851651e-06	0.00410004301221799	17	Yes	mature-tR0-Leu-CAA	3105	4324	1509	453	1305	613
TGGAGGCGTGGGTTCGAAT	-8.881931759621	0.000118440483103516	0.0413786476609981	19	Yes	mature-tR0-Leu-CAA;mature-tR0-Leu-CAG	0	31	145	0	0	4678
CATATGTCTGCGTGGG	-3.50061422755233	0.000102948095948839	0.0371438920194931	16	Yes	mature-tR0-Leu-TAA	488	454	178	23	4	808
ATATGTCTGCGTGGGT	-3.74857486019151	7.72159889881253e-05	0.0292879352650058	16	Yes	mature-tR0-Leu-TAA	342	450	211	6	7	6
ACCAGGATGGCCGAGTGGTTAAGG	-1.81237022357358	5.22627814842988e-09	6.96657875962595e-06	24	Yes	mature-tR0-Leu-TAA_5_end	5354	7430	2441	496	2338	0
ACCAGAATGGCCGAG	-3.82024146875325	7.50752089138923e-08	7.6195183341952e-05	15	Yes	mature-tR0-Leu-TAA_5_end	863	332	1160	35	0	263
ACCAGGATGGCCGAGT	-4.17525798592411	7.76069570617705e-08	7.81949736080432e-05	16	Yes	mature-tR0-Leu-TAA_5_end	516	342	1049	0	10	775
GGTAGCGTGGCCGAGCGGTC	-1.87230925671629	1.17836286729447e-05	0.00623525171916243	20	Yes	mature-tR0-Leu-TAG_5_end;mature-tR0-Leu-AAG_5_end	1839	1841	2799	351	703	494
CAGTCGGTAGAGCATGGGACTCTT	-9.11393849480534	3.77495548134546e-05	0.0164197302470795	24	Yes	mature-tR0-Lys-CTT	109	52	62	0	0	483
GCCCGGCTAGCTCAGTCGGTAGAGCATGAGA	0.935475414279091	1.37121100239559e-07	0.00013218426616346	31	Yes	mature-tR0-Lys-CTT_5_end	9583	8682	4902	8216	13167	14907
CCACGTTGGGCGCCA	-1.93325798167668	4.14661260570587e-06	0.00259893259592042	15	Yes	mature-tR0-Lys-CTT_CCA_end	2810	3510	906	402	815	400
CCCGGGTTTCGGCACCA	-2.60933553797524	6.92579958627645e-07	0.000548931190821817	17	Yes	mature-tR0-Phe-GAA_CCA_end;mature-tR0-Ser-GGA_CCA_end	1537	2456	579	68	365	200
ATCCCGGACGAGCCCCCA	-2.72340903311603	1.40017557773899e-20	7.2912507491625e-17	18	Yes	mature-tR0-Pro-AGG_CCA_end;mature-tR0-Pro-CGG_CCA_end;mature-tR0-Pro-TGG_CCA_end	9450	8722	3091	901	1128	2587
ATCCCGGACGAGCCCC	-1.29535449055097	0.000103215190742469	0.0371995291913299	16	Yes	mature-tR0-Pro-AGG;mature-tR0-Pro-CGG;mature-tR0-Pro-TGG	7431	3462	463	984	1620	230
TGCGAGAGGTCCCGGGTTCA	-9.00451635646105	6.6325990718029e-05	0.0258978127317299	20	Yes	mature-tR0-Pro-AGG;mature-tR0-Pro-CGG;mature-tR0-Pro-TGG	118	98	0	0	0	1204
TCCCGGACGAGCCCCCA	-2.12445083727887	1.52768967892784e-06	0.00110547196389844	17	Yes	mature-tR0-Pro-CGG_CCA_end;mature-tR0-Pro-TGG_CCA_end;mature-tR0-Pro-AGG_CCA_end	2310	2813	1363	429	487	347
ATCCCGGACGAGCCCCC	-2.41371303639137	3.19272846253658e-13	7.94903340715696e-10	17	Yes	mature-tR0-Pro-TGG;mature-tR0-Pro-CGG;mature-tR0-Pro-AGG	8842	5130	968	599	877	0
GCCCGGATGATCCTCAGT	-2.30454664565274	0.000126780973557126	0.0434982085322014	18	Yes	mature-tR0-SeC-TCA_5_end	749	644	1405	95	188	855
GTAGTCGTGGCCGAGTGGT	-1.67992147536099	5.03399105693201e-09	6.74252278127872e-06	19	Yes	mature-tR0-Ser-AGA_5_end;mature-tR0-Ser-TGA_5_end	4315	3355	9118	937	1631	810
GTCACGGTGGCCGAG	-3.38450015287638	2.96991812980705e-05	0.0134101189849853	15	Yes	mature-tR0-Ser-CGA_5_end	306	385	741	53	26	2906
GACGAGGTGGCCGAG	-0.99606951676601	1.92779312764895e-05	0.00938119696763948	15	Yes	mature-tR0-Ser-GCT_5_end	10020	5219	8515	3344	2633	3946
GCAGCGATGGCCGAGTGGTTAAGG	-3.42898407094779	6.582999937371e-09	8.53019008163662e-06	24	Yes	mature-tR0-Ser-TGA_5_end	1543	1824	532	45	197	20
GCAGCGATGGCCGAGT	-4.50779829700473	2.20760479635132e-07	0.000203314928343635	16	Yes	mature-tR0-Ser-TGA_5_end	239	367	813	0	15	35
ATCTCGCTGGGGCCTCCA	-2.52234039920393	2.2797821106972e-06	0.00154722508435977	18	Yes	mature-tR0-Thr-TGT_CCA_end	1857	1798	638	178	282	173
GTTTCCGTAGTGTAGTGGTTATCACGTTCGCCT	0.557301170703462	0.000126148784874918	0.0434411771679387	33	Yes	mature-tR0-Val-AAC_5_end;mature-tR0-Val-CAC_5_end	12468	15792	12870	9157	19140	1249
CCTCACACGCGAAAGGTCCCCGGT	-2.29181388543643	5.31231970600411e-05	0.0215741356923355	24	Yes	mature-tR0-Val-CAC	1438	1502	524	143	338	424
ACGCGAAAGGTCCCCGG	-3.85449988780627	5.89331290436228e-05	0.0236067219064099	17	Yes	mature-tR0-Val-CAC;mature-tR0-Val-AAC	269	480	234	0	27	2708
ACACGCAGAAGGTCCTGGGTTCGAGCCCCAGTGGAACCAC	4.13266507311266	3.743005356703e-05	0.0163202916851835	40	Yes	mature-tR0-Val-TAC	22	18	11	272	272	645
GGTTCCATAGTGTAGCGGTTATCACGTCTGCTTT	2.15745427257758	5.08450742440112e-07	0.000420956417801198	34	Yes	mature-tR0-Val-TAC_5_end	588	642	349	1482	2658	1841
GGGCTGGAGAGATGGCTCAGCCGTTAAAGGCTAGGCTCACA	4.58422542541185	3.64732845629654e-05	0.0160020074217628	41	Yes	miR0	10	20	0	237	258	97
TGAGGTAGTAGGTTGTATAG	-1.46186810627	2.42672598906811e-05	0.011343518908128	20	Yes	mmu-let-7a-1;mmu-let-7a-2	2887	4530	3005	289	1968	1032
TGAGGTAGTAGGTTGTGTGGTTT	-1.26310647784236	1.88410723138881e-05	0.00920075116790124	23	Yes	mmu-let-7b	4434	5998	4295	578	3324	1499
TGAGGTAGTAGGTTGTATGG	-1.74481745848541	8.28112421592368e-05	0.0310508721525607	20	Yes	mmu-let-7c-1;mmu-let-7c-2	1750	2252	1790	295	629	11353
AGAGGTAGTAGGTTGCATAGT	-1.85409205177626	1.62181562906853e-06	0.00116301087562509	21	Yes	mmu-let-7d	2536	2759	3205	505	884	647
TGAGGTAGGAGGTTGTATAGTT	-1.94543292616468	3.47820411392904e-06	0.00221488062884585	22	Yes	mmu-let-7e	1835	3220	2049	170	714	652
TGAGGTAGTAGATTGTATAGTTT	-1.89918939017506	2.50703576240447e-07	0.000226401176086571	20	Yes	mmu-let-7f-1;mmu-let-7f-2	2525	5078	2375	385	1029	826
TGAGGTAGTAGATTGTATAGTTT	-1.60232494199347	3.76124463275481e-06	0.00238150897377802	23	Yes	mmu-let-7f-2	2899	5538	2451	614	1443	981
GAGGTAGTAGTTTGTACAGTT	-3.36907913212137	2.9064849318718e-05	0.0131770898225358	21	Yes	mmu-let-7g	368	731	411	23	66	12
AACCCGTAGATCCGAACTTGTG	-1.84074530964134	4.34842624474912e-05	0.0183831534090422	22	Yes	mmu-mir-100	2046	2427	1279	316	605	2871
AGCAGCATTGTACAGGGCTATGA	-2.82292005588362	2.11525738208298e-17	8.60292161111545e-14	23	Yes	mmu-mir-103-1;mmu-mir-103-2	4999	5732	4758	173	1334	0
CCGCACTGTGGGTACTTGCTG	-2.79239084871176	6.75786461697139e-05	0.026331570530981	21	Yes	mmu-mir-106b	558	808	679	57	150	10208
TACCCTGTAGATCCGAATTTGTGT	-1.92586228542618	9.10631001258353e-06	0.005043682779236	24	Yes	mmu-mir-10a	2412	2130	1878	324	755	397
TACCCTGTAGAACCGAATTTGTG	-1.156902433883	4.37696377217512e-05	0.0184897683413059	23	Yes	mmu-mir-10b	4799	6317	4726	1308	2909	1057
TCCCTGAGACCCTTTAACCTGT	-1.23144509557214	2.59221133320968e-07	0.000232585222665233	22	Yes	mmu-mir-125a	7730	8343	7930	2815	3728	2357
TCACAGTGAACCGGTCTCTTTT	-2.53999525165759	1.46328269789331e-05	0.00745952869569234	22	Yes	mmu-mir-128-1	1088	1181	992	72	306	121
CTTTTTGCGGTCTGGGCTTGC	-9.05772225394601	5.06773202288841e-05	0.0208083242876433	21	Yes	mmu-mir-129-2;mmu-mir-129-1	0	64	139	0	0	807
TGAGATGAAGCACTGTAGCTC	1.0171274952914	1.82817272490961e-05	0.00900183580223017	21	Yes	mmu-mir-143	2561	5733	3205	3527	9321	6887
TGAGAACTGAATTCCATGGGTTA	-3.24930869278946	2.21521482545307e-07	0.000203679133431385	23	Yes	mmu-mir-146a	1018	964	1105	65	148	74
TGAGAACTGAATTCCATAGGCTGT	-1.81672656754026	1.61187274218858e-05	0.00807661306852566	24	Yes	mmu-mir-146b	2774	2900	1234	298	903	479
TCAGTGCACTACAGAACTTTG	-2.00981498493563	2.368336648997e-06	0.00159759503323806	21	Yes	mmu-mir-148a	1212	4390	1416	176	880	441
TCAGTGCATCACAGAACTTTGT	-2.758527741655	2.78540029607579e-05	0.0127317242901597	22	Yes	mmu-mir-148b	691	1417	405	42	196	979
TCTCCCAACCCTTGTACCAGTG	-4.1066540708771	3.18581471907041e-07	0.000279984874340511	22	Yes	mmu-mir-150	207	378	1088	43	15	27
TCGAGGAGCTCACAGTCTAGT	-1.69248675823268	5.58942584293022e-07	0.000457323375245564	21	Yes	mmu-mir-151	4033	4711	3019	520	2060	675
TAGCAGCACATCATGGTTTA	-2.79950272584682	2.97459887455499e-07	0.00026308202331957	20	Yes	mmu-mir-15b	1219	1726	1232	31	431	92
TAGCAGCACGTAAATATTGG	-2.38707519267516	1.9160139555873e-06	0.00132949416676673	20	Yes	mmu-mir-16-1;mmu-mir-16-2	1540	1864	1413	59	476	263
AACATTCAACGCTGTCGGTGA	-2.53599680737737	1.44185836903974e-05	0.00736378611040562	21	Yes	mmu-mir-181a-1;mmu-mir-181a-2	909	1395	982	147	133	187
TATGGCACTGGTAGAATTCACT	-1.53000837658031	7.07865373555847e-05	0.0273140933165916	22	Yes	mmu-mir-183	2738	3154	2180	703	594	294
AAGGTAGATAGAACAGGTCTTG	-3.12239842685879	0.000135817261026131	0.0455879636573191	22	Yes	mmu-mir-1839	483	699	206	35	36	840
TGGACGGAGAACTGATAAGG	-2.59329038317225	6.59289696163291e-05	0.0257743622098543	20	Yes	mmu-mir-184	614	1104	745	73	172	51336
CAACGGAATCCCAAAAGCAGCTG	-1.67346766941014	5.85808385509128e-09	7.71646747805747e-06	23	Yes	mmu-mir-191	6261	6659	4555	1092	2319	48
TAGCAGCACAGAAATATTGGCA	-3.64753188580239	3.22326986579835e-07	0.000282385807629588	22	Yes	mmu-mir-195a	419	1329	588	52	81	31
ACAGTAGTCTGCACATTGGTT	-2.06955022073574	4.80155971863801e-05	0.0199357754070634	21	Yes	mmu-mir-199b;mmu-mir-199a-2;mmu-mir-199a-1	990	1781	1509	91	447	9298
ATACTGCCTGGTAATGATGA	-8.88402651307086	0.000117392555605559	0.0411642278526503	20	Yes	mmu-mir-200b	79	119	1	0	0	1131
AATACTGCCGGGTAATGATG	-5.13774441431706	9.2026848427861e-05	0.0339804106530947	20	Yes	mmu-mir-200c	121	271	95	8	0	5791
TTCCCTTTGTCATCCTATGCCT	-2.19022724174937	5.73873538769397e-07	0.000466797951922511	22	Yes	mmu-mir-204	3091	2230	1410	444	500	319
TCCTTCATTCCACCGGAGTCTGT	-1.9185868488028	1.78168334730453e-07	0.000166846410804136	23	Yes	mmu-mir-205	3302	4032	2682	785	980	539
TAGCTTATCAGACTGATGTTG	-1.43892161228521	5.14683164222747e-07	0.000424853795960403	21	Yes	mmu-mir-21a	2909	10104	3765	885	2944	1505
AGCTACATTGTCTGCTGGGTT	-3.2775620698038	3.86651059187469e-07	0.000332466209365225	21	Yes	mmu-mir-221	478	979	1354	116	34	93
AGCTACATCTGGCTACTGGGTC	-3.97360341414878	1.86727043227391e-06	0.00130706584442048	22	Yes	mmu-mir-222	230	613	654	39	13	28
ATCACATTGCCAGGGATTTCCAA	-2.71810474925022	2.97475991732776e-05	0.0134152301119741	23	Yes	mmu-mir-23a	871	962	692	43	166	10
TGGCTCAGTTCAGCAGGAA	-3.59880137003898	0.000128933527887782	0.0440179897407726	19	Yes	mmu-mir-24-2;mmu-mir-24-1	298	403	287	5	6	1165
CATTGCACTTGTCTCGGTCT	-2.07546962940584	2.09382820109838e-05	0.0100228533966495	20	Yes	mmu-mir-25	1501	2068	1285	158	652	219
CAAGTAATCCAGGATAGGCT	-5.10556654310915	9.44537619854293e-05	0.0346469332723248	20	Yes	mmu-mir-26a-1;mmu-mir-26a-2	156	178	151	0	0	1330
TTCAAGTAATCCAGGATAG	-2.6090723748047	7.98508876581932e-05	0.0300014269010578	19	Yes	mmu-mir-26a-2;mmu-mir-26a-1	651	1116	599	92	68	84
TTCAAGTAATTCAGGATAGG	-3.69621000392286	1.45816057929671e-06	0.00106205554663834	20	Yes	mmu-mir-26b	517	870	500	22	58	43
TTCACAGTGGCTAAGTTCTG	-1.95014420653441	1.99830286363407e-05	0.00968203802250666	20	Yes	mmu-mir-27b	1272	2775	1570	247	759	285
AGGGCCCCCCCTCAATCCTGT	-4.33736625372904	2.93905962384862e-05	0.0132923265569173	21	Yes	mmu-mir-296	425	210	207	0	10	589
CTAGCACCATCTGAAATCG	-8.85067214212332	0.000136288775075943	0.0457186890936573	19	Yes	mmu-mir-29a	81	26	75	0	0	1425
CTTTCAGTCGGATGTTTGCAGC	-3.44306538788405	2.14657388559769e-05	0.0102267638286082	22	Yes	mmu-mir-30a	391	676	435	24	63	33
TGTAAACATCCTACACTCTCAGCT	-1.92242741234608	1.6999029796685e-19	8.23625166296951e-16	24	Yes	mmu-mir-30c-1;mmu-mir-30c-2	10009	15528	11604	1317	4618	200
TGTAAACATCCCCGACTGGA	-2.7623676509849	2.93882380405068e-06	0.00191518507061871	20	Yes	mmu-mir-30d	1189	1502	701	51	186	174
CTTTCAGTCGGATGTTTACAGC	-3.70908899345397	1.42774612735009e-05	0.00732528420532408	22	Yes	mmu-mir-30e	324	607	404	6	28	47
AAAAGCTGGGTTGAGAGGGCGA	-2.67803629385967	3.64096616594901e-05	0.0159866819385747	22	Yes	mmu-mir-320	685	1012	816	71	176	663
CTCGGAGCCTGGGGCA	-8.89022846602252	0.000114106449474914	0.0402653404578388	16	Yes	mmu-mir-328	41	106	46	0	0	450
ATCACTAACTCCACTGCCATC	-1.62518726628043	5.46505604611854e-05	0.0220977835873497	21	Yes	mmu-mir-34b	2564	2598	2144	317	1114	94
AATCACTAACTCCACTGCCA	-1.77228132118886	7.05131946120268e-05	0.0272274753332469	20	Yes	mmu-mir-34b	2102	1904	1731	232	836	1092
AATCACTAACCACACAGCCAGGT	-3.83611263512815	9.43125725903834e-07	0.000725829037591654	23	Yes	mmu-mir-34c	253	901	650	1	43	58
TGGATATGATGACTGATTACCTGAGAA	-9.04131026110728	5.51251060101518e-05	0.0222573607375337	27	Yes	mmu-mir-3535	46	66	95	0	0	2207
ATATAATACAACCTGCTAAGTG	-5.3473195595855	3.87601659584493e-06	0.0024486141576404	22	Yes	mmu-mir-374b	228	446	67	0	6	8
TTTGTTCGTTCGGCTCGCGTG	-2.45835626896985	7.03012025674971e-07	0.000556408054809428	21	Yes	mmu-mir-375	1787	2123	1175	169	438	200
ACTGGACTTGGAGTCAGAAGGC	-3.84283309468881	6.47598627804822e-05	0.0254233191186324	22	Yes	mmu-mir-378a	191	275	466	12	44	0
AGCTCGGTCTGAGGCCCCTCAGT	-2.24754313021871	0.000128324570046366	0.043946630107028	23	Yes	mmu-mir-423	838	1311	905	151	230	648
AATGACACGATCACTCCCGTTGAGT	-1.86605506171319	6.33325650226982e-07	0.000506287975681452	25	Yes	mmu-mir-425	2973	4689	1863	258	1417	600
TAATACTGTCTGGTAATGCCG	-2.62070964434774	6.15077572417823e-07	0.000493825752990615	21	Yes	mmu-mir-429	1158	2092	1233	126	234	244
AAACCGTTACCATTACTGAGTT	-3.77406490702583	2.54002703274034e-07	0.000228639363872794	22	Yes	mmu-mir-451a	485	652	1006	16	58	59
TATTTAGAATGGCACTGATGTGA	-1.9050289741379	6.07485987186416e-05	0.0242001961619001	23	Yes	mmu-mir-465a	1239	2593	1195	187	750	97
TATTTAGAATGGTGCTGATCTGA	-2.34358336604809	1.33578836908331e-05	0.00693651371267037	23	Yes	mmu-mir-465b-2;mmu-mir-465b-1	800	1675	1438	54	478	166
TCCTGTACTGAGCTGCCCCGAG	-2.45230931380567	4.76714593411667e-05	0.0198669113166078	22	Yes	mmu-mir-486a;mmu-mir-486b	930	322	1588	133	109	1144
CATGCCTTGAGTGTAGGACCGT	-3.46420539603151	0.000135765739130347	0.0455879636573191	22	Yes	mmu-mir-532	330	352	373	28	33	1190
ACTCCCCAGCCTACACAT	-8.86023874344687	0.000130571530634609	0.0443616775331086	18	Yes	mmu-mir-664	0	14	157	0	0	121574
CCAGGAGTCTGAGGGG	-8.94032043138117	9.04120499974197e-05	0.033472883812666	16	Yes	mmu-mir-7033	8	72	110	0	0	816
TGAGAGATGCCATTCTATGTAGA	-2.83445505459477	5.8054392048959e-06	0.00343754800273746	23	Yes	mmu-mir-741	653	1435	820	35	153	149
AAAGACACCAAGCTGAGTAGA	-2.30928376456252	9.20397049868698e-07	0.000710299213596039	21	Yes	mmu-mir-743a	1842	2050	1705	65	706	244
TGCGGGGCTAGGGCTAACAGCA	-5.63043606748399	3.97795528718668e-06	0.00250732681727098	22	Yes	mmu-mir-744	172	342	133	0	12	0
TGGAAGACTAGTGATTTTGTTGTT	-2.06590821810543	1.4510747475574e-05	0.00740406903472075	24	Yes	mmu-mir-7a-2;mmu-mir-7a-1	1305	3045	884	86	706	292
TATTCAGATTAGTGCCAGTCAT	-2.76417074619699	0.000141041504960679	0.0469622997810176	22	Yes	mmu-mir-871	598	853	405	19	112	98
TATCTAGTTGGATGTCAAGACA	-3.49783264187074	5.97725978875449e-06	0.00352058074175065	22	Yes	mmu-mir-878	501	1074	238	36	72	30
AACTGTGTCTTTTCTGAATAGA	-2.09610447107329	2.50162774599986e-05	0.0116354914731492	22	Yes	mmu-mir-881	638	3210	864	97	678	2035
TATTCAGAGAGATAACAGTCA	-2.15620993530299	0.000144920413853866	0.0480358152261962	21	Yes	mmu-mir-881	870	1793	672	39	487	0
TCTTTGGTTATCTAGCTGTATGA	-3.43065040461294	6.02877361618115e-09	7.88538115305158e-06	23	Yes	mmu-mir-9-2;mmu-mir-9-3;mmu-mir-9-1	1472	2151	335	18	185	2362
TATTGCACTTGTCCCGGCCTGTT	-2.20338765681015	1.63151993545033e-06	0.00116612376087732	23	Yes	mmu-mir-92a-1	2218	1808	1803	269	325	448
TATTGCACTTGTCCCGGCCTG	-1.85543228191345	5.45039456765456e-05	0.0220545050773525	21	Yes	mmu-mir-92a-2;mmu-mir-92a-1	1987	1607	1758	239	710	512
CAAAGTGCTGTTCGTGCAGGTAGT	-2.63670555984366	5.26872331760191e-07	0.000434272181262516	24	Yes	mmu-mir-93	1431	1983	1100	100	361	171
CACCCGTAGAACCGACCTTGCG	-2.21010793962668	3.61353782067976e-07	0.000314107197863425	22	Yes	mmu-mir-99b	2525	2470	1866	439	375	425
AAAGGTTTGGTCCTGGCCT	-1.8771239772497	0.000121532223884641	0.0421647196925798	19	Yes	Mt_rR0	1349	1231	1926	217	474	493
AACGTTAGGTCAAGGTGTAGCC	-2.50648626764388	1.40042542517671e-05	0.00720978520820781	22	Yes	Mt_rR0	2101	1077	307	193	159	153
AAACGTTAGGTCAAGGTGTAGCCA	-2.80399127094887	2.04721681773531e-05	0.00987609297553194	24	Yes	Mt_rR0	662	850	937	157	119	41
AAAACGTTAGGTCAAGGTGT	-3.20265358292296	8.70615234296435e-07	0.000676566391070615	20	Yes	Mt_rR0	666	1206	897	85	135	49
AAAAACGTTAGGTCAAGGTGT	-3.21974872145114	0.000102219907620955	0.0369363880203111	21	Yes	Mt_rR0	530	484	324	62	21	485
AAAAACGTTAGGTCAAGGTGTA	-3.24626781158555	9.57040438418806e-07	0.000733498434501478	22	Yes	Mt_rR0	841	936	875	56	93	87
TAAAAACGTTAGGTCAAGGTGTA	-3.32681307128547	5.14458459602073e-05	0.0210308957524343	23	Yes	Mt_rR0	560	708	169	21	65	26254
AAAACGTTAGGTCAAGGTG	-4.31007864906986	7.03470828836248e-05	0.0272199243832826	19	Yes	Mt_rR0	226	348	158	17	0	6929
TAAAAACGTTAGGTCAAGGTGTAGCC	-6.81141710189732	3.49192387477242e-05	0.0154755738894055	26	Yes	Mt_rR0	161	86	88	0	0	149
CAAAACTATTTGCCAGAGAACTACT	-9.02649251786091	5.93985512224565e-05	0.0237589940815797	25	Yes	Mt_rR0	28	40	131	0	0	2618
CGTTAGGTCAAGGTGTAGCCAATG	-9.12591452294447	3.53995931940846e-05	0.0156417916985028	24	Yes	Mt_rR0	98	85	45	0	0	116
ATCCGATGATTAAACTCTTCACTGCTGTTC	-4.28870550379538	1.80412328383684e-06	0.00126604465053029	30	Yes	NO_Annotation	661	441	210	18	0	32
GAGAAAGACATATAGGAA	-5.54405205962333	8.68522428886101e-05	0.032435121457845	18	Yes	NO_Annotation	141	132	140	3	1	3320
AGCTCGCTCTGAAGGCCTGTTTCCTAGGCT	-2.26771452032142	7.33081802449869e-08	7.46738298915983e-05	30	Yes	piR0	1169	1613	4398	734	228	199
AATTTCGGTTGGGAA	-2.44435702766194	6.34419045333436e-05	0.0250171229914605	15	Yes	piR0	758	829	1200	146	119	859
CAACATCCTGGTTGCTCCTATCTGATT	-2.53846208684501	5.99690570353761e-05	0.0239528020713557	27	Yes	piR0	1179	1029	469	330	55	3966
ACTAATCCTAGCCCTAGCCCTAA	-2.62539657635144	5.11533657175779e-05	0.020942060135325	23	Yes	piR0	1287	639	590	72	92	17346
TTTTTTCGGCGGTAGAAG	-3.22277588947091	3.05993090628746e-06	0.00198251500194687	18	Yes	piR0	543	918	864	51	78	81
CAGGGTGGGCGGGTCATGGGC	-3.36490654808705	2.47182538950394e-06	0.00165141053810276	21	Yes	piR0	578	925	678	0	148	44
CATCCTGGTTGCTCCTATCTGATT	-3.62545967686887	6.0296783644335e-06	0.00354187340842764	24	Yes	piR0	328	555	697	94	20	3
ACATCCTGGTTGCTCCTATCTGATT	-3.7317616973324	3.92770728172168e-07	0.00033668911081577	25	Yes	piR0	472	838	813	107	1	28
AGGTCCCTGGTAGCTA	-3.77935078325055	4.08443115100636e-05	0.0174387401708267	16	Yes	piR0	284	164	590	24	48	1342
AATTTCGGTTGGGAAA	-3.78109898777773	4.14138464869063e-05	0.0176147947511751	16	Yes	piR0	268	653	183	6	51	0
CGGCGATGATGACACT	-4.06189263645089	2.82135073216141e-07	0.000251122749912623	16	Yes	piR0	378	783	659	33	0	51
AATTTCGGTTGGGAAAAAA	-4.3460442906216	0.000118449618656638	0.0413786476609981	19	Yes	piR0	186	362	105	20	0	553
ATCCTGGTTGCTCCTATCTGATT	-4.67093165626602	1.46146345749264e-06	0.00106307157164533	23	Yes	piR0	237	288	541	18	0	16
TCCGACGTGGATATCCCGGGAGGTC	-4.92921523177306	3.96546387260147e-05	0.0170750913073788	25	Yes	piR0	198	239	167	0	0	951
CTGTACCACCTTGTCGGA	-5.4265189557071	6.48026543861011e-07	0.000516557811121484	18	Yes	piR0	161	506	224	8	0	8
TCGGAGGCTTTGTTTT	-5.51724255782354	5.97777507546007e-09	7.83707410422494e-06	16	Yes	piR0	122	427	754	3	13	39
GTACTGCCCTGCTGATGGAT	-8.97148284566292	7.78808652364641e-05	0.0294599044814022	20	Yes	processed_transcript	0	17	168	0	0	373
TTACTTGATGATAGTAAAAGATCTGATG	-2.7649442019194	4.82186646145045e-07	0.000402802964566053	28	Yes	processed_transcript;snoR0	252	2514	1318	97	246	171
GCAATGATGTCATCTTACTACTGAAA	-3.71661849873548	0.000141080651031372	0.0469622997810176	26	Yes	processed_transcript;snoR0	161	425	305	0	39	0
CCTGCATGATGACGAACAAATACTGACT	-3.81189631795928	0.000102994154902487	0.0371438920194931	28	Yes	processed_transcript;snoR0	219	226	427	23	19	252
TAGCTGTGGAGAAAGGTATTTTCTGAGT	-4.04410559181836	2.69513494823739e-05	0.0123800679456586	28	Yes	processed_transcript;snoR0	149	474	366	27	0	1285
CTGCATGATGACGAACAAATACTGACT	-4.37421457313842	9.08330058689035e-05	0.0336064027490666	27	Yes	processed_transcript;snoR0	71	399	191	9	18	901
AGTAATGATGATTTCTGGTGATTCTGAGT	-4.9915326345858	9.3916260166976e-05	0.0344951885316001	29	Yes	processed_transcript;snoR0	22	215	253	10	0	4269
TTGCAATGATGTCATCTTACTACTGA	-5.0627253736142	4.15125824684355e-07	0.000352597497341274	26	Yes	processed_transcript;snoR0	99	477	474	28	0	0
CTACGGGGATGATAT	-6.12132607680406	4.03394594756669e-05	0.0172898026348052	15	Yes	processed_transcript;snoR0	41	145	199	0	0	1249
TGATCACAACCAGTTACAGATTTCTTT	-8.87795205137737	0.000120645690830505	0.0420032550876447	27	Yes	RNY3-YR0	0	146	46	0	0	463
GTCAGTGATGATTGGTAAAAGGTCTGATT	-4.6925891822404	7.22862356034468e-05	0.027815723491633	29	Yes	scaR0	79	281	229	20	0	579
CCAGGTGATGGAGTGTGCTGAGAACACTGAGGC	-5.88888957538694	9.25427371913664e-05	0.0341314608204478	33	Yes	scaR0	109	76	167	5	0	57
ATGGAAGCTGCGGAGTCAACC	-7.4156524120759	4.87442354483587e-05	0.0201931602598297	21	Yes	scaR0	40	44	183	0	0	777
CCAGGTGATGGAGTGTGCTGAGAACACTGAGG	-8.83488306106613	0.000146119480105736	0.0482896281851218	32	Yes	scaR0	35	87	61	0	0	93
CTTAAGTGAGGATGAAGTTATCTGAGG	-10.7517958461309	4.29375536499826e-11	8.14542256019309e-08	27	Yes	snoR0	222	345	139	0	0	628
GTACATGATGAAAACAGTCTCCCTCTTCTGAAT	-2.08299667673716	8.79817437392643e-05	0.0327253323057949	33	Yes	snoR0	1061	1089	1634	343	199	623
AGTGGTGATGACACTAGAACCACCAAGATCGCTGATG	-2.68126870734612	0.000137714329142756	0.0461691017178411	37	Yes	snoR0	307	644	974	98	104	828
GCGTCGTGGGGAAGCCAACCTTGGAGAGCTGAGC	-2.81027542629972	6.25792470609403e-09	8.14685296025358e-06	34	Yes	snoR0	1597	1569	2480	187	288	140
TGAAATGATGATTCTGTTTATCCATTCGCTGAGT	-2.98779211688463	4.36900084596943e-07	0.000368284959359411	34	Yes	snoR0	610	1340	1477	149	38	164
ACCCCCTTGATGTCCAGCACTGGGCTCTGACC	-3.15258330882526	9.59462414705983e-05	0.0350559254327886	32	Yes	snoR0	368	368	649	13	45	7154
TAGATGTGTAGAGAAATGATAACTGAGC	-3.25183878263135	4.61592083775414e-05	0.0193524825552162	28	Yes	snoR0	459	644	414	18	96	936
GTTCATGGGTGAGAAACAGCTAGTCTGACA	-3.31737993502951	1.29338612652412e-06	0.000953256370156053	30	Yes	snoR0	584	663	1135	100	102	21
TCACCAAGATGAGTGGTGCAAATCTGATC	-3.38206407035121	0.000101175326744374	0.036630201630083	29	Yes	snoR0	191	733	281	21	33	3398
TGGAAAGGATGAACGAACTTGGCCTGACC	-3.65105182109608	2.87586267841852e-07	0.000254753883273134	29	Yes	snoR0	558	842	906	86	36	37
TCGCTGTGATGATGGATTCCAAAACC	-3.68492150406124	1.7038185293423e-07	0.00015982334113876	26	Yes	snoR0	642	781	960	91	41	31
GGTCGATGATGAGAGCTTTGTTCTGA	-3.69042539779049	5.4191931875362e-07	0.000444047095906367	26	Yes	snoR0	464	705	913	56	20	57
TCGCTGTGATGATGGA	-3.70323774675621	1.90502183295936e-05	0.00929359561750889	16	Yes	snoR0	212	540	513	28	0	47
AGATGTGTAGAGAAATGATAACTGAGC	-3.8245509742261	3.56241683916161e-05	0.0157063646656937	27	Yes	snoR0	208	597	283	24	30	1658
TATATGTGTGGATGGTAATAATGCTGAGT	-3.93498465633565	3.56302965549217e-05	0.0157063646656937	29	Yes	snoR0	156	498	351	22	32	91633
GTCGATGATGAGAGCTTTGTTCTGAGCCA	-3.95489488225099	3.54601734037519e-06	0.00225548561858865	29	Yes	snoR0	390	349	636	31	13	30
TGGCTTTGCTGAAATCCAGAGGCTGTTTCTGAGC	-3.95608504063449	1.44108208259878e-24	9.2293853517611e-21	34	Yes	snoR0	3075	3726	5832	271	167	599
CACGAGGACGAGACGTAGCG	-3.98412517302723	5.18511163540497e-06	0.00314373487718313	20	Yes	snoR0	233	608	464	62	0	9
GGTCGATGATGAGAGC	-4.04439681036751	0.000128479290870786	0.0439725897299097	16	Yes	snoR0	122	288	321	21	0	162
TGGCTTTGCTGAAATCCAGAGGCTGTTTCTGAG	-4.13791930767496	2.19341536113785e-05	0.010397862877592	33	Yes	snoR0	209	221	513	16	13	17
GGTCGATGATGAGAG	-4.19674357382044	6.12899620495594e-07	0.00049278721434912	15	Yes	snoR0	243	789	511	25	16	28
CCACGAGGACGAGAC	-4.23618890115951	2.63246960249987e-07	0.000235439123245089	15	Yes	snoR0	154	776	715	15	26	32
CACCAAGATGAGTGGTGCAAATCTGATC	-4.35218210133406	4.9179398915681e-07	0.000408989093758631	28	Yes	snoR0	196	721	529	16	16	26
TTGCTTTGCTGAAATCCAGAGGCTGTTTCTGAG	-4.37223039058138	6.20242720192931e-09	8.09351384693909e-06	33	Yes	snoR0	391	553	1233	29	11	619
CCGGGTGATGCGAATCGTAATCTGAGC	-4.397425924365	2.39161142306823e-06	0.001607509362453	27	Yes	snoR0	188	302	639	34	7	7
TGCTTTGCTGAAATCCAGAGGCTGTTTCTGAGC	-4.42473939849179	3.1956486713745e-13	7.94903340715696e-10	33	Yes	snoR0	977	1392	1752	51	76	672
TCACAATGATGATGAATGGTCCAAAC	-4.5126653567784	5.65459227126624e-05	0.0227486084305187	26	Yes	snoR0	72	271	318	0	0	103
TATCAATGATGTCCTAAAAAATAAATGTCTGAAC	-4.5294029248576	2.26572294430876e-05	0.0106805259504179	34	Yes	snoR0	113	399	273	14	8	7
GTCTGATGATGAGCCCATTGCCCTGAGC	-4.58521438364454	0.000143524582759019	0.0476298167167943	28	Yes	snoR0	135	194	216	20	0	355
ATGCAGTGTGGAACATAATGAACTGAAC	-4.7689964205344	3.33301106800056e-07	0.000291541669855452	28	Yes	snoR0	251	503	477	33	1	5
TTTTGATGTAGTCTATGTGGTTCTGAGA	-4.98307235137703	2.38351808548397e-05	0.0111542618835176	28	Yes	snoR0	131	276	222	10	0	6
TGTTCTGTGATGAGGCTCTGGAATGTGCGCTGGGC	-5.1070469679829	0.000142720095086598	0.0474193260472878	35	Yes	snoR0	87	100	240	11	0	522
AGGTCGATGATGAGAGCTTTGTTCTGAGCC	-5.21786009926897	5.38534444128801e-06	0.00323695800349651	30	Yes	snoR0	133	154	404	7	0	8
CTTTCTGAAGAGTCATGGTTTACTGAGG	-5.27496466160624	6.24865989538524e-07	0.00050096270605895	28	Yes	snoR0	293	181	436	21	0	0
AGTGAGTGTTGACACCTTGGGTCTGAGT	-5.61600112462693	7.83923866356838e-05	0.0295931259549706	28	Yes	snoR0	28	118	251	0	0	33
TCCGGGTGATGCGAATCGTAATCTGAGC	-5.6532761069876	4.02116934066993e-07	0.000343117204429997	28	Yes	snoR0	93	290	440	0	12	3
TTTTGTGAAGAGTCATGGTTTACTGAGG	-8.76802463078111	2.96353954183515e-13	7.47174025934447e-10	28	Yes	snoR0	272	332	545	2	0	832
TCGATGATGAGAGCTTTGTTCTGAGC	-8.86365482765574	0.000128650815872758	0.0439772687706392	26	Yes	snoR0	11	127	51	0	0	3151
GTCAATGATGAGCTGGCATGTATTCTGAAT	-8.88337163604217	0.000117694546334456	0.0412441662088651	30	Yes	snoR0	42	48	94	0	0	5199
CCCAGCTGAGTGTTTCTTTGAAGAGA	-9.18402427442295	2.56823227979441e-05	0.0119051026953298	26	Yes	snoR0	54	87	90	0	0	28
TAGGGTGATGAAAACGTATCCTTAGGCGTGGTTA	3.82585898407293	1.03612782212901e-05	0.00559418663965175	34	Yes	snoR0	8	73	13	531	221	337
GTCTAGTGATGAATTTCATAGGGCAGATTCTGAGGTGAAAA	4.98156588325335	4.67844111940167e-06	0.00288042056057394	41	Yes	snoR0	7	9	9	231	97	316
ATTGCTGTTGAGACTTGGAAATCTGATT	-3.27858618239147	2.05747707095859e-05	0.00988773877601522	28	Yes	snoR0;processed_transcript	558	644	503	46	76	33
ATAATTACGGATCTGGCTTCTGAGA	-4.43443632801858	3.35469852779648e-05	0.0149178329824654	25	Yes	snoR0;processed_transcript	236	254	276	17	9	1164
CTACGGGGATGATATGA	-4.48699246713012	2.40003957000875e-06	0.00161117837110021	17	Yes	snoR0;processed_transcript	107	514	484	10	13	18
TATCTGTGAGGATAAGTAACTCTGAGGA	-5.05106975799631	0.000126990448558104	0.043543266481286	28	Yes	snoR0;processed_transcript	37	141	267	12	0	1392
AGTCTATGATGATCCTATCCCGAACCTGAAT	-3.38186318554138	7.91991027957625e-05	0.0298572043888842	31	Yes	snoR0;processed_transcript;lincR0	279	321	605	79	0	1510
GTCTATGATGATCCTATCCCGAACCTGAAT	-3.55267404255472	8.25560869071862e-06	0.00465110475872751	30	Yes	snoR0;processed_transcript;lincR0	317	371	869	40	34	41
ATTTTTTGAGGCCTTGTTTCGGCAAGGCT	-11.2942466919743	2.70948001049757e-14	7.47373845073832e-11	29	Yes	snR0	149	399	443	0	0	461
CGTTCGCGCTCTCCCCTG	-2.22809554260813	3.80389154288332e-05	0.0165197999125421	18	Yes	snR0	1307	1194	1273	300	255	3132
TTTGAGGCCTTGTCTTGACAAGGCT	-4.87861706631782	0.00011040818735538	0.0391836547213656	25	Yes	snR0	0	260	240	15	0	770
ACCTCCAGGAACGGTGCACC	-5.11490737864977	5.58260993086649e-05	0.0224752487527421	20	Yes	snR0	23	213	272	13	0	792
CAATTTTTTGAGGCCTTGTCTTGACAAGGCT	-5.29342583471474	2.03181968010433e-06	0.00139422365462726	31	Yes	snR0	70	386	332	14	0	3
TTTTGAGGCCTTGTTTCGGCAAGGCT	-5.57359033462311	5.10493315002774e-10	8.10375413636454e-07	26	Yes	snR0	225	939	468	0	33	118
AGAGAAGATTAGCATGGCCCCT	-5.70185193988444	0.00012444050687828	0.0429331306671882	22	Yes	snR0	105	30	217	0	0	1828
GATTAGCATGGCCCCTGCGCAAGGATGACA	-8.91644593612667	0.000101115189187118	0.036630201630083	30	Yes	snR0	51	40	97	0	0	476
GTTGGTCCCGGCGCCCTT	-9.18191760625222	2.59821116835636e-05	0.012014085318643	18	Yes	snR0	80	24	121	0	0	370
ATTGCACTCCGGATGTGCTGACCCCTGCGATTTCCCC	4.20291307934507	3.16952716811396e-06	0.0020425341419549	37	Yes	snR0	44	26	0	653	246	184

## Sheet: piRNA
Sequence	logFC	PValue	adjpValue	Length	Match_Genome	Annotation	Reads_CD1	Reads_CD2	Reads_CD3	Reads_HFD1.1	Reads_HFD1.2	Reads_HFD1.3
AGCTCGCTCTGAAGGCCTGTTTCCTAGGCT	-2.26771452032142	7.33081802449869e-08	7.46738298915983e-05	30	Yes	piR0	1169	1613	4398	734	228	199
AATTTCGGTTGGGAA	-2.44435702766194	6.34419045333436e-05	0.0250171229914605	15	Yes	piR0	758	829	1200	146	119	859
CAACATCCTGGTTGCTCCTATCTGATT	-2.53846208684501	5.99690570353761e-05	0.0239528020713557	27	Yes	piR0	1179	1029	469	330	55	3966
ACTAATCCTAGCCCTAGCCCTAA	-2.62539657635144	5.11533657175779e-05	0.020942060135325	23	Yes	piR0	1287	639	590	72	92	17346
TTTTTTCGGCGGTAGAAG	-3.22277588947091	3.05993090628746e-06	0.00198251500194687	18	Yes	piR0	543	918	864	51	78	81
CAGGGTGGGCGGGTCATGGGC	-3.36490654808705	2.47182538950394e-06	0.00165141053810276	21	Yes	piR0	578	925	678	0	148	44
CATCCTGGTTGCTCCTATCTGATT	-3.62545967686887	6.0296783644335e-06	0.00354187340842764	24	Yes	piR0	328	555	697	94	20	3
ACATCCTGGTTGCTCCTATCTGATT	-3.7317616973324	3.92770728172168e-07	0.00033668911081577	25	Yes	piR0	472	838	813	107	1	28
AGGTCCCTGGTAGCTA	-3.77935078325055	4.08443115100636e-05	0.0174387401708267	16	Yes	piR0	284	164	590	24	48	1342
AATTTCGGTTGGGAAA	-3.78109898777773	4.14138464869063e-05	0.0176147947511751	16	Yes	piR0	268	653	183	6	51	0
CGGCGATGATGACACT	-4.06189263645089	2.82135073216141e-07	0.000251122749912623	16	Yes	piR0	378	783	659	33	0	51
AATTTCGGTTGGGAAAAAA	-4.3460442906216	0.000118449618656638	0.0413786476609981	19	Yes	piR0	186	362	105	20	0	553
ATCCTGGTTGCTCCTATCTGATT	-4.67093165626602	1.46146345749264e-06	0.00106307157164533	23	Yes	piR0	237	288	541	18	0	16
TCCGACGTGGATATCCCGGGAGGTC	-4.92921523177306	3.96546387260147e-05	0.0170750913073788	25	Yes	piR0	198	239	167	0	0	951
CTGTACCACCTTGTCGGA	-5.4265189557071	6.48026543861011e-07	0.000516557811121484	18	Yes	piR0	161	506	224	8	0	8
TCGGAGGCTTTGTTTT	-5.51724255782354	5.97777507546007e-09	7.83707410422494e-06	16	Yes	piR0	122	427	754	3	13	39
ACAGGTCCCTGGTAG	-8.84440385377637	0.000140138769412435	0.0467848537620818	15	Yes	piR0	81	66	40	0	0	1262
TTTTCTGCTGGAGGCGAATCACTGGAATCA	-8.85559877559153	0.000133341389655552	0.0449973067974997	30	Yes	piR0	91	20	72	0	0	118
TCACAATCGTTCACAGTGGTCAAGACTTC	-8.85762664047477	0.000132165310652348	0.0447939108530301	29	Yes	piR0	60	95	35	0	0	689
CTGTCTCTCCAGCCACCTTTTT	-8.87588396994802	0.000121730452814885	0.0422072128213602	22	Yes	piR0	0	43	134	0	0	2696
TAGTTGGATGGTATGCTCTAGAGACTGC	-8.87768780393803	0.000120758262647018	0.0420032550876447	28	Yes	piR0	25	54	103	0	0	220
TATTTTAGTAGGATGTAACTTGGAGAGT	-8.90055863404052	0.000108838358604819	0.0387499329271687	28	Yes	piR0	67	81	46	0	0	4222
ACAGGTCCCTGGTAGC	-8.92626083097372	9.66389636110349e-05	0.0352858873751196	16	Yes	piR0	87	118	0	0	0	2523
TTTTTCTAAATTTATTGGCGCTGGGATT	-8.93383756601573	9.32231442903058e-05	0.0342832459652956	28	Yes	piR0	41	55	95	0	0	5107
TCCTGGCGGGCAGCTGTG	-8.94614861678816	8.79715659228574e-05	0.0327253323057949	18	Yes	piR0	97	43	58	0	0	209
CAGCCTGGGCTACACATTA	-8.97209664151783	7.76988589035017e-05	0.029411023907909	19	Yes	piR0	67	89	48	0	0	420
CAGAAATTCAAGGTCATCCTCAAGCATAGA	-8.98468900042269	7.30843569839997e-05	0.028045366988922	30	Yes	piR0	88	52	63	0	0	2686
ATGCTAGGGTTGGTGG	-9.05514356143472	5.13520292713474e-05	0.0210079568206329	16	Yes	piR0	44	20	138	0	0	1063
CAGCCTGGGCTACACATTTTAA	-9.08455136777033	4.41147226721899e-05	0.0185932544067454	22	Yes	piR0	18	155	49	0	0	512
TAGATTGAGGCCAGT	-9.14918206895126	3.11665433336518e-05	0.013959554887522	15	Yes	piR0	0	80	138	0	0	3956
TTTCACAGATGAGGAAACTGAAGCTTAGG	-9.1755983768616	2.69340432661624e-05	0.0123800679456586	29	Yes	piR0	107	76	52	0	0	87430

## Sheet: miRNA
Sequence	logFC	PValue	adjpValue	Length	Match_Genome	Annotation	Reads_CD1	Reads_CD2	Reads_CD3	Reads_HFD1.1	Reads_HFD1.2	Reads_HFD1.3
TACCCTGTAGAACCGAATTTGTG	-1.156902433883	4.37696377217512e-05	0.0184897683413059	23	Yes	mmu-mir-10b	4799	6317	4726	1308	2909	1057
TACCCTGTAGATCCGAATTTGTG	-1.20762622468923	2.05174971656101e-05	0.00988627406994816	23	Yes	mmu-mir-10a	5282	5995	4721	1430	3166	1497
TCCCTGAGACCCTTTAACCTGT	-1.23144509557214	2.59221133320968e-07	0.000232585222665233	22	Yes	mmu-mir-125a	7730	8343	7930	2815	3728	2357
TGAGGTAGTAGGTTGTGTGGTTT	-1.26310647784236	1.88410723138881e-05	0.00920075116790124	23	Yes	mmu-let-7b	4434	5998	4295	578	3324	1499
AATCACTAACTCCACTGCCAT	-1.37868198203053	3.29271837162275e-06	0.00210156901430067	21	Yes	mmu-mir-34b	5256	5372	4389	899	2982	1238
ACCCTGTAGATCCGAATTTGT	-1.39383457823569	1.87975770272591e-06	0.00131086632588467	21	Yes	mmu-mir-10a	5533	5941	4164	1147	2587	1426
ATCACATTGCCAGGGATTTCCA	-1.41994332145277	2.70540019116601e-05	0.0124137601546541	22	Yes	mmu-mir-23a	3510	4294	3131	682	1500	3555
TAGCTTATCAGACTGATGTTG	-1.43892161228521	5.14683164222747e-07	0.000424853795960403	21	Yes	mmu-mir-21a	2909	10104	3765	885	2944	1505
TGAGGTAGTAGGTTGTATAG	-1.46186810627	2.42672598906811e-05	0.011343518908128	20	Yes	mmu-let-7a-1;mmu-let-7a-2	2887	4530	3005	289	1968	1032
TGAGGTAGTAGGTTGTATAGTTT	-1.46576395008921	3.73640967712807e-07	0.000322274010526159	23	Yes	mmu-let-7a-2;mmu-let-7a-1	5240	6002	5115	750	3118	1374
AATGACACGATCACTCCCGTTGA	-1.4954111606056	4.07647250934826e-06	0.00256073248870773	23	Yes	mmu-mir-425	3562	5717	3165	489	2172	1155
TATGGCACTGGTAGAATTCACT	-1.53000837658031	7.07865373555847e-05	0.0273140933165916	22	Yes	mmu-mir-183	2738	3154	2180	703	594	294
TGAGGTAGTAGATTGTATAGTTT	-1.60232494199347	3.76124463275481e-06	0.00238150897377802	23	Yes	mmu-let-7f-2	2899	5538	2451	614	1443	981
TGTAAACATCCTCGACTGGAAG	-1.61355276729168	2.16336831129314e-05	0.0102850442778961	22	Yes	mmu-mir-30a	1634	4796	2155	381	1517	579
ATCACTAACTCCACTGCCATC	-1.62518726628043	5.46505604611854e-05	0.0220977835873497	21	Yes	mmu-mir-34b	2564	2598	2144	317	1114	94
CAACGGAATCCCAAAAGCAGCTG	-1.67346766941014	5.85808385509128e-09	7.71646747805747e-06	23	Yes	mmu-mir-191	6261	6659	4555	1092	2319	48
TCGAGGAGCTCACAGTCTAGT	-1.69248675823268	5.58942584293022e-07	0.000457323375245564	21	Yes	mmu-mir-151	4033	4711	3019	520	2060	675
TGTAAACATCCTCGACTGGAAGC	-1.71767385804421	4.70254939578154e-06	0.00289206787840565	23	Yes	mmu-mir-30a	1857	4600	2585	391	1117	824
TGAGGTAGTAGGTTGTATGG	-1.74481745848541	8.28112421592368e-05	0.0310508721525607	20	Yes	mmu-let-7c-1;mmu-let-7c-2	1750	2252	1790	295	629	11353
AATCACTAACTCCACTGCCA	-1.77228132118886	7.05131946120268e-05	0.0272274753332469	20	Yes	mmu-mir-34b	2102	1904	1731	232	836	1092
TGAGAACTGAATTCCATAGGCTGT	-1.81672656754026	1.61187274218858e-05	0.00807661306852566	24	Yes	mmu-mir-146b	2774	2900	1234	298	903	479
ACCCTGTAGATCCGAATTTGTGT	-1.82968297019471	4.09190994091498e-07	0.000348087221370751	23	Yes	mmu-mir-10a	4189	3798	2323	526	1126	804
AACCCGTAGATCCGAACTTGTG	-1.84074530964134	4.34842624474912e-05	0.0183831534090422	22	Yes	mmu-mir-100	2046	2427	1279	316	605	2871
AGAGGTAGTAGGTTGCATAGT	-1.85409205177626	1.62181562906853e-06	0.00116301087562509	21	Yes	mmu-let-7d	2536	2759	3205	505	884	647
TATTGCACTTGTCCCGGCCTG	-1.85543228191345	5.45039456765456e-05	0.0220545050773525	21	Yes	mmu-mir-92a-2;mmu-mir-92a-1	1987	1607	1758	239	710	512
AATGACACGATCACTCCCGTTGAGT	-1.86605506171319	6.33325650226982e-07	0.000506287975681452	25	Yes	mmu-mir-425	2973	4689	1863	258	1417	600
TAGCAGCACATCATGGTTTAC	-1.8758367117104	5.65362592270801e-09	7.46479580064852e-06	21	Yes	mmu-mir-15b	3823	5676	4287	434	2285	903
TGAGGTAGTAGATTGTATAG	-1.89918939017506	2.50703576240447e-07	0.000226401176086571	20	Yes	mmu-let-7f-1;mmu-let-7f-2	2525	5078	2375	385	1029	826
TATTTAGAATGGCACTGATGTGA	-1.9050289741379	6.07485987186416e-05	0.0242001961619001	23	Yes	mmu-mir-465a	1239	2593	1195	187	750	97
TCCTTCATTCCACCGGAGTCTGT	-1.9185868488028	1.78168334730453e-07	0.000166846410804136	23	Yes	mmu-mir-205	3302	4032	2682	785	980	539
TGTAAACATCCTACACTCTCAGCT	-1.92242741234608	1.6999029796685e-19	8.23625166296951e-16	24	Yes	mmu-mir-30c-1;mmu-mir-30c-2	10009	15528	11604	1317	4618	200
TACCCTGTAGATCCGAATTTGTGT	-1.92586228542618	9.10631001258353e-06	0.005043682779236	24	Yes	mmu-mir-10a	2412	2130	1878	324	755	397
TGAGGTAGGAGGTTGTATAGTT	-1.94543292616468	3.47820411392904e-06	0.00221488062884585	22	Yes	mmu-let-7e	1835	3220	2049	170	714	652
TTCACAGTGGCTAAGTTCTG	-1.95014420653441	1.99830286363407e-05	0.00968203802250666	20	Yes	mmu-mir-27b	1272	2775	1570	247	759	285
TCAGTGCACTACAGAACTTTG	-2.00981498493563	2.368336648997e-06	0.00159759503323806	21	Yes	mmu-mir-148a	1212	4390	1416	176	880	441
TGGAAGACTAGTGATTTTGTTGTT	-2.06590821810543	1.4510747475574e-05	0.00740406903472075	24	Yes	mmu-mir-7a-2;mmu-mir-7a-1	1305	3045	884	86	706	292
ACAGTAGTCTGCACATTGGTT	-2.06955022073574	4.80155971863801e-05	0.0199357754070634	21	Yes	mmu-mir-199b;mmu-mir-199a-2;mmu-mir-199a-1	990	1781	1509	91	447	9298
CATTGCACTTGTCTCGGTCT	-2.07546962940584	2.09382820109838e-05	0.0100228533966495	20	Yes	mmu-mir-25	1501	2068	1285	158	652	219
AACTGTGTCTTTTCTGAATAGA	-2.09610447107329	2.50162774599986e-05	0.0116354914731492	22	Yes	mmu-mir-881	638	3210	864	97	678	2035
TATTCAGAGAGATAACAGTCA	-2.15620993530299	0.000144920413853866	0.0480358152261962	21	Yes	mmu-mir-881	870	1793	672	39	487	0
TCAGTGCACTACAGAACTTTGTC	-2.1770754699143	2.4840500387134e-07	0.000225054933507434	23	Yes	mmu-mir-148a	1399	4616	1463	239	805	382
TTCCCTTTGTCATCCTATGCCT	-2.19022724174937	5.73873538769397e-07	0.000466797951922511	22	Yes	mmu-mir-204	3091	2230	1410	444	500	319
TATTGCACTTGTCCCGGCCTGTT	-2.20338765681015	1.63151993545033e-06	0.00116612376087732	23	Yes	mmu-mir-92a-1	2218	1808	1803	269	325	448
CACCCGTAGAACCGACCTTGCG	-2.21010793962668	3.61353782067976e-07	0.000314107197863425	22	Yes	mmu-mir-99b	2525	2470	1866	439	375	425
TGAGGTAGTAGTTTGTACAG	-2.21240113415213	1.23651199068973e-07	0.000119821237581289	20	Yes	mmu-let-7g	1814	3400	2351	213	953	306
AGCTCGGTCTGAGGCCCCTCAGT	-2.24754313021871	0.000128324570046366	0.043946630107028	23	Yes	mmu-mir-423	838	1311	905	151	230	648
AAAGACACCAAGCTGAGTAGA	-2.30928376456252	9.20397049868698e-07	0.000710299213596039	21	Yes	mmu-mir-743a	1842	2050	1705	65	706	244
TATTTAGAATGGTGCTGATCTGA	-2.34358336604809	1.33578836908331e-05	0.00693651371267037	23	Yes	mmu-mir-465b-2;mmu-mir-465b-1	800	1675	1438	54	478	166
GAAAGACACCAAGCTGAGTAG	-2.36958092479642	9.98024245359175e-05	0.0362040237699705	21	Yes	mmu-mir-743a	778	1010	1011	21	286	1592
TAGCAGCACGTAAATATTGG	-2.38707519267516	1.9160139555873e-06	0.00132949416676673	20	Yes	mmu-mir-16-1;mmu-mir-16-2	1540	1864	1413	59	476	263
TGAGGTAGTAGTTTGTACAGTTT	-2.39020994113063	3.66033461899806e-12	8.06127211999813e-09	23	Yes	mmu-let-7g	3557	6565	3112	415	1335	8
TCCTGTACTGAGCTGCCCCGAG	-2.45230931380567	4.76714593411667e-05	0.0198669113166078	22	Yes	mmu-mir-486a;mmu-mir-486b	930	322	1588	133	109	1144
TTTGTTCGTTCGGCTCGCGTG	-2.45835626896985	7.03012025674971e-07	0.000556408054809428	21	Yes	mmu-mir-375	1787	2123	1175	169	438	200
AACATTCAACGCTGTCGGTGA	-2.53599680737737	1.44185836903974e-05	0.00736378611040562	21	Yes	mmu-mir-181a-1;mmu-mir-181a-2	909	1395	982	147	133	187
TCACAGTGAACCGGTCTCTTTT	-2.53999525165759	1.46328269789331e-05	0.00745952869569234	22	Yes	mmu-mir-128-1	1088	1181	992	72	306	121
TGGACGGAGAACTGATAAGG	-2.59329038317225	6.59289696163291e-05	0.0257743622098543	20	Yes	mmu-mir-184	614	1104	745	73	172	51336
TTCAAGTAATCCAGGATAG	-2.6090723748047	7.98508876581932e-05	0.0300014269010578	19	Yes	mmu-mir-26a-2;mmu-mir-26a-1	651	1116	599	92	68	84
TAATACTGTCTGGTAATGCCG	-2.62070964434774	6.15077572417823e-07	0.000493825752990615	21	Yes	mmu-mir-429	1158	2092	1233	126	234	244
CAAAGTGCTGTTCGTGCAGGTAGT	-2.63670555984366	5.26872331760191e-07	0.000434272181262516	24	Yes	mmu-mir-93	1431	1983	1100	100	361	171
AAAAGCTGGGTTGAGAGGGCGA	-2.67803629385967	3.64096616594901e-05	0.0159866819385747	22	Yes	mmu-mir-320	685	1012	816	71	176	663
ATCACATTGCCAGGGATTTCCAA	-2.71810474925022	2.97475991732776e-05	0.0134152301119741	23	Yes	mmu-mir-23a	871	962	692	43	166	10
TCAGTGCATCACAGAACTTTGT	-2.758527741655	2.78540029607579e-05	0.0127317242901597	22	Yes	mmu-mir-148b	691	1417	405	42	196	979
TGTAAACATCCCCGACTGGA	-2.7623676509849	2.93882380405068e-06	0.00191518507061871	20	Yes	mmu-mir-30d	1189	1502	701	51	186	174
TATTCAGATTAGTGCCAGTCAT	-2.76417074619699	0.000141041504960679	0.0469622997810176	22	Yes	mmu-mir-871	598	853	405	19	112	98
CCGCACTGTGGGTACTTGCTG	-2.79239084871176	6.75786461697139e-05	0.026331570530981	21	Yes	mmu-mir-106b	558	808	679	57	150	10208
TAGCAGCACATCATGGTTTA	-2.79950272584682	2.97459887455499e-07	0.00026308202331957	20	Yes	mmu-mir-15b	1219	1726	1232	31	431	92
AGCAGCATTGTACAGGGCTATGA	-2.82292005588362	2.11525738208298e-17	8.60292161111545e-14	23	Yes	mmu-mir-103-1;mmu-mir-103-2	4999	5732	4758	173	1334	0
TGAGAGATGCCATTCTATGTAGA	-2.83445505459477	5.8054392048959e-06	0.00343754800273746	23	Yes	mmu-mir-741	653	1435	820	35	153	149
AGCTACATCTGGCTACTGGGT	-2.95240967526083	3.17662592391572e-05	0.0141939390420738	21	Yes	mmu-mir-222	694	702	645	65	78	831
AAGGTAGATAGAACAGGTCTTG	-3.12239842685879	0.000135817261026131	0.0455879636573191	22	Yes	mmu-mir-1839	483	699	206	35	36	840
TGAGAACTGAATTCCATGGGTTA	-3.24930869278946	2.21521482545307e-07	0.000203679133431385	23	Yes	mmu-mir-146a	1018	964	1105	65	148	74
AGCTACATTGTCTGCTGGGTT	-3.2775620698038	3.86651059187469e-07	0.000332466209365225	21	Yes	mmu-mir-221	478	979	1354	116	34	93
GAGGTAGTAGTTTGTACAGTT	-3.36907913212137	2.9064849318718e-05	0.0131770898225358	21	Yes	mmu-let-7g	368	731	411	23	66	12
TCTTTGGTTATCTAGCTGTATGA	-3.43065040461294	6.02877361618115e-09	7.88538115305158e-06	23	Yes	mmu-mir-9-2;mmu-mir-9-3;mmu-mir-9-1	1472	2151	335	18	185	2362
CTTTCAGTCGGATGTTTGCAGC	-3.44306538788405	2.14657388559769e-05	0.0102267638286082	22	Yes	mmu-mir-30a	391	676	435	24	63	33
CATGCCTTGAGTGTAGGACCGT	-3.46420539603151	0.000135765739130347	0.0455879636573191	22	Yes	mmu-mir-532	330	352	373	28	33	1190
TATCTAGTTGGATGTCAAGACA	-3.49783264187074	5.97725978875449e-06	0.00352058074175065	22	Yes	mmu-mir-878	501	1074	238	36	72	30
TGGCTCAGTTCAGCAGGAA	-3.59880137003898	0.000128933527887782	0.0440179897407726	19	Yes	mmu-mir-24-2;mmu-mir-24-1	298	403	287	5	6	1165
TAGCAGCACAGAAATATTGGCA	-3.64753188580239	3.22326986579835e-07	0.000282385807629588	22	Yes	mmu-mir-195a	419	1329	588	52	81	31
TTCAAGTAATTCAGGATAGG	-3.69621000392286	1.45816057929671e-06	0.00106205554663834	20	Yes	mmu-mir-26b	517	870	500	22	58	43
CTTTCAGTCGGATGTTTACAGC	-3.70908899345397	1.42774612735009e-05	0.00732528420532408	22	Yes	mmu-mir-30e	324	607	404	6	28	47
TCTCCCAACCCTTGTACCAGT	-3.75300374809732	3.49400957534631e-05	0.0154755738894055	21	Yes	mmu-mir-150	263	306	529	4	64	1026
AAACCGTTACCATTACTGAGTT	-3.77406490702583	2.54002703274034e-07	0.000228639363872794	22	Yes	mmu-mir-451a	485	652	1006	16	58	59
AATCACTAACCACACAGCCAGGT	-3.83611263512815	9.43125725903834e-07	0.000725829037591654	23	Yes	mmu-mir-34c	253	901	650	1	43	58
TAGCAGCACAGAAATATTGGC	-3.8412021021204	4.60637412528711e-06	0.00283918760936806	21	Yes	mmu-mir-195a	403	921	180	1	25	53
ACTGGACTTGGAGTCAGAAGGC	-3.84283309468881	6.47598627804822e-05	0.0254233191186324	22	Yes	mmu-mir-378a	191	275	466	12	44	0
AGCTACATCTGGCTACTGGGTC	-3.97360341414878	1.86727043227391e-06	0.00130706584442048	22	Yes	mmu-mir-222	230	613	654	39	13	28
TCTCCCAACCCTTGTACCAGTG	-4.1066540708771	3.18581471907041e-07	0.000279984874340511	22	Yes	mmu-mir-150	207	378	1088	43	15	27
CTTTGGTTATCTAGCTGTATGA	-4.27180095503936	6.39833307771859e-06	0.0037136325078896	22	Yes	mmu-mir-9-2;mmu-mir-9-3;mmu-mir-9-1	375	745	27	0	32	17
AGGGCCCCCCCTCAATCCTGT	-4.33736625372904	2.93905962384862e-05	0.0132923265569173	21	Yes	mmu-mir-296	425	210	207	0	10	589
ATACTGCCGGGTAATGATGGA	-4.61452689319904	2.83091907946399e-05	0.0128764065460126	21	Yes	mmu-mir-200c	190	249	278	0	15	0
CAAGTAATCCAGGATAGGCT	-5.10556654310915	9.44537619854293e-05	0.0346469332723248	20	Yes	mmu-mir-26a-1;mmu-mir-26a-2	156	178	151	0	0	1330
AATACTGCCGGGTAATGATG	-5.13774441431706	9.2026848427861e-05	0.0339804106530947	20	Yes	mmu-mir-200c	121	271	95	8	0	5791
ATATAATACAACCTGCTAAGTG	-5.3473195595855	3.87601659584493e-06	0.0024486141576404	22	Yes	mmu-mir-374b	228	446	67	0	6	8
TGCGGGGCTAGGGCTAACAGCA	-5.63043606748399	3.97795528718668e-06	0.00250732681727098	22	Yes	mmu-mir-744	172	342	133	0	12	0
CTAGCACCATCTGAAATCG	-8.85067214212332	0.000136288775075943	0.0457186890936573	19	Yes	mmu-mir-29a	81	26	75	0	0	1425
ACTCCCCAGCCTACACAT	-8.86023874344687	0.000130571530634609	0.0443616775331086	18	Yes	mmu-mir-664	0	14	157	0	0	121574
ATACTGCCTGGTAATGATGA	-8.88402651307086	0.000117392555605559	0.0411642278526503	20	Yes	mmu-mir-200b	79	119	1	0	0	1131
CTCGGAGCCTGGGGCA	-8.89022846602252	0.000114106449474914	0.0402653404578388	16	Yes	mmu-mir-328	41	106	46	0	0	450
CCAGGAGTCTGAGGGG	-8.94032043138117	9.04120499974197e-05	0.033472883812666	16	Yes	mmu-mir-7033	8	72	110	0	0	816
TGGATATGATGACTGATTACCTGAGAA	-9.04131026110728	5.51251060101518e-05	0.0222573607375337	27	Yes	mmu-mir-3535	46	66	95	0	0	2207
CTTTTTGCGGTCTGGGCTTGC	-9.05772225394601	5.06773202288841e-05	0.0208083242876433	21	Yes	mmu-mir-129-2;mmu-mir-129-1	0	64	139	0	0	807
TGAGATGAAGCACTGTAGCTC	1.0171274952914	1.82817272490961e-05	0.00900183580223017	21	Yes	mmu-mir-143	2561	5733	3205	3527	9321	6887

## Sheet: mt tsRNA
Sequence	logFC	PValue	adjpValue	Length	Match_Genome	Annotation	Reads_CD1	Reads_CD2	Reads_CD3	Reads_HFD1.1	Reads_HFD1.2	Reads_HFD1.3
CACTATGAAGCTAAGAGCGTTAACCTT	-1.59755490902181	2.55849376574416e-05	0.0118698346489175	27	Yes	mature-mt_tR0-Lys-TTT_5_end	2191	3968	2369	320	1543	4
AAGAAAGATTGCAAGAACTGCT	-1.61147924645569	1.94263824324221e-05	0.00942873347345058	22	Yes	mature-mt_tR0-Ser-GCT_5_end	667	2980	4687	697	1018	718
AAGAAAGATTGCAAGAACT	-2.17113924438983	1.3980017253728e-07	0.0001345341245873	19	Yes	mature-mt_tR0-Ser-GCT_5_end	852	3047	3698	611	528	360
AAGAAAGATTGCAAGAACTGC	-4.02668510090157	2.27377384965516e-05	0.0107094171706624	21	Yes	mature-mt_tR0-Ser-GCT_5_end	48	336	604	18	31	8
CACTATGAAGCTAAGAG	-4.46515279438194	5.80033621328828e-07	0.00046997203001666	17	Yes	mature-mt_tR0-Lys-TTT_5_end	194	464	648	32	24	0
AAGAAAGATTGCAAGA	-4.93513838853777	1.33366559424918e-07	0.000128787717930624	16	Yes	mature-mt_tR0-Ser-GCT_5_end	93	190	910	2	26	9
GGTAAAATGGCTGAGT	-5.38292739559619	0.000127684761847775	0.0437544111032976	16	Yes	mature-mt_tR0-Tyr-GTA_5_end	22	110	260	0	0	4393
TAGGATAAGGTGTTTAGGTAGCACGGAGAA	2.06625053375784	3.17681621376021e-06	0.0020425341419549	30	Yes	mature-mt_tR0-Gln-TTG_5_end	331	950	247	1271	2370	1709
TGAATCTGACAACAGGAAATAAACCTCCT	2.10209758059062	3.04771007986168e-06	0.00197741961771128	29	Yes	mature-mt_tR0-His-GTG	282	878	274	727	3482	1210
AATTAGTAGATTCTGAATAAACCCAGAAGAGAGTA	3.46307109797523	1.43438372636277e-05	0.00735018662450746	35	Yes	mature-mt_tR0-Gly-TCC_3_end	47	92	9	376	632	363
ATGTCATTGGTCGCAGTTGAATGCTGTGTAGAAATA	3.55642479581073	3.86922831253223e-05	0.0167487845243778	36	Yes	mature-mt_tR0-Glu-TTC_3_end	34	48	25	429	267	3645
AGTAAGGTCAGCTAATTAAGCTATCGGGCCCATACCCCGAAAACG	3.81760750846404	1.14626012975691e-07	0.000112246868488445	45	Yes	mature-mt_tR0-Met-CAT_5_end	34	40	85	517	619	786
TGAATCTGACAACAGGAAATAAACCTCCTTAT	3.85406111814266	4.19334266871932e-06	0.0026252680916671	32	Yes	mature-mt_tR0-His-GTG	31	49	22	220	670	379
TAGGATAAGGTGTTTAGGTAGCACGGAGAATTTTGAATTCTT	4.46368799459159	2.83588419649004e-07	0.000252013766418227	42	Yes	mature-mt_tR0-Gln-TTG_5_end	7	32	26	227	695	355
TCATGTCATTGGTCGCAGTTGAATGCTGTGTAGAAATA	4.62669810939566	1.02945933205435e-06	0.000781477445813846	38	Yes	mature-mt_tR0-Glu-TTC_3_end	30	14	4	330	338	317
CATGTCATTGGTCGCAGTTGAATGCTGTGTAGAAATA	4.64675319112848	1.71799240244801e-05	0.00853923449348803	37	Yes	mature-mt_tR0-Glu-TTC_3_end	7	18	6	307	206	155
GATTTTTCATGTCATTGGTCGCAGTTGAATGCTGTGTAGAAATA	4.71810525140181	1.22898105800795e-05	0.00645406178804382	44	Yes	mature-mt_tR0-Glu-TTC_3_end	10	14	6	293	247	148
AGAAATATGTCTGATAAAAGAATTACTTTGATAGAGTAAATT	4.81620691236508	1.90297149115873e-06	0.00132374117997345	42	Yes	mature-mt_tR0-Ile-GAT_5_end	1	17	16	179	484	211
TTTTCATGTCATTGGTCGCAGTTGAATGCTGTGTAGAAATA	4.83030492895846	3.89956496389879e-05	0.0168564670460416	41	Yes	mature-mt_tR0-Glu-TTC_3_end	14	7	1	238	144	2
TGTCATTGGTCGCAGTTGAATGCTGTGTAGAAATA	5.00759656167615	1.78011713306903e-06	0.00125077360072476	35	Yes	mature-mt_tR0-Glu-TTC_3_end	5	14	9	248	320	220
GACTTCCAATTAGTAGATTCTGAATAAACCCAGAAGAGAGTA	5.30370371514147	1.56687249203383e-06	0.00112942520548037	42	Yes	mature-mt_tR0-Gly-TCC_3_end	8	12	1	273	211	209
AGAAATATGTCTGATAAAAGAATTACTTTGATAGAGTAAAT	6.00111311278431	1.37137375044669e-06	0.00100806825859023	41	Yes	mature-mt_tR0-Ile-GAT_5_end	0	10	0	107	292	159
TAGGATAAGGTGTTTAGGTAGCACGGAGAATTTTGAATTCTTAAG	6.90699882638944	8.84280287117477e-27	6.65827206998631e-23	45	Yes	mature-mt_tR0-Gln-TTG_5_end	9	10	22	1231	1230	2371

## Sheet: tsRNA
Sequence	logFC	PValue	adjpValue	Length	Match_Genome	Annotation	Reads_CD1	Reads_CD2	Reads_CD3	Reads_HFD1.1	Reads_HFD1.2	Reads_HFD1.3
GACGAGGTGGCCGAG	-0.99606951676601	1.92779312764895e-05	0.00938119696763948	15	Yes	mature-tR0-Ser-GCT_5_end	10020	5219	8515	3344	2633	3946
TCCCTGGTGGTCTAGTGGTTAGGATTCGGC	-1.09009910631	3.90869810295564e-70	8.06624998513279e-66	30	Yes	mature-tR0-Glu-CTC_5_end	216207	105605	118300	34681	57423	253
CCATCCTCTGCTACCA	-1.28431080751962	3.9951937589231e-05	0.0171633154243204	16	Yes	mature-tR0-iMet-CAT_CCA_end	4812	7138	1307	1028	2345	0
ATCCCGGACGAGCCCC	-1.29535449055097	0.000103215190742469	0.0371995291913299	16	Yes	mature-tR0-Pro-AGG;mature-tR0-Pro-CGG;mature-tR0-Pro-TGG	7431	3462	463	984	1620	230
TCCCTGGTGGTCTAGTGGTTAGGATTC	-1.47173523628097	8.50794190596346e-06	0.00476436196038571	27	Yes	mature-tR0-Glu-CTC_5_end	6633	3655	1691	512	1388	1580
GGTAGCGTGGCCGAGCG	-1.5251244320482	7.2832976907306e-06	0.00416223655415198	17	Yes	mature-tR0-Leu-AAG_5_end;mature-tR0-Leu-TAG_5_end	5462	3458	2284	806	1052	1317
TCCCTGGTGGTCTAGTGGTTAGGAT	-1.66302852599175	2.59535020622394e-05	0.0120108237658299	25	Yes	mature-tR0-Glu-CTC_5_end	4623	2403	919	399	854	7154
GTAGTCGTGGCCGAGTGGT	-1.67992147536099	5.03399105693201e-09	6.74252278127872e-06	19	Yes	mature-tR0-Ser-AGA_5_end;mature-tR0-Ser-TGA_5_end	4315	3355	9118	937	1631	810
CGTATGGAGGCGTGGGT	-1.70003473575987	7.14241601851651e-06	0.00410004301221799	17	Yes	mature-tR0-Leu-CAA	3105	4324	1509	453	1305	613
CATTGGTGGTTCAGTGGTAGAATTCTCG	-1.74653016577252	3.12191666397683e-06	0.00201798230394576	28	Yes	mature-tR0-Gly-GCC	5964	1493	1762	538	872	864
ACCAGGATGGCCGAGTGGTTAAGG	-1.81237022357358	5.22627814842988e-09	6.96657875962595e-06	24	Yes	mature-tR0-Leu-TAA_5_end	5354	7430	2441	496	2338	0
CCCTGGTGGTCTAGTGGTTAGGATTCGG	-1.86886132589322	1.48649384258082e-07	0.000141804986017096	28	Yes	mature-tR0-Glu-CTC	6514	2482	1889	648	772	1001
GGTAGCGTGGCCGAGCGGTC	-1.87230925671629	1.17836286729447e-05	0.00623525171916243	20	Yes	mature-tR0-Leu-TAG_5_end;mature-tR0-Leu-AAG_5_end	1839	1841	2799	351	703	494
CCACGTTGGGCGCCA	-1.93325798167668	4.14661260570587e-06	0.00259893259592042	15	Yes	mature-tR0-Lys-CTT_CCA_end	2810	3510	906	402	815	400
TCCCGGACGAGCCCCCA	-2.12445083727887	1.52768967892784e-06	0.00110547196389844	17	Yes	mature-tR0-Pro-CGG_CCA_end;mature-tR0-Pro-TGG_CCA_end;mature-tR0-Pro-AGG_CCA_end	2310	2813	1363	429	487	347
TTGGTGGTTCAGTGGTAGAATTCTCGC	-2.25769080564751	0.000133492252438606	0.0449973067974997	27	Yes	mature-tR0-Gly-GCC	1376	801	826	81	141	14
GCATTGGTGGTTCAGTGGTAGA	-2.28210040758509	2.99177420218592e-05	0.0134651588668496	22	Yes	mature-tR0-Gly-GCC_5_end	2300	961	551	167	141	589
CCTCACACGCGAAAGGTCCCCGGT	-2.29181388543643	5.31231970600411e-05	0.0215741356923355	24	Yes	mature-tR0-Val-CAC	1438	1502	524	143	338	424
GCCCGGATGATCCTCAGT	-2.30454664565274	0.000126780973557126	0.0434982085322014	18	Yes	mature-tR0-SeC-TCA_5_end	749	644	1405	95	188	855
TTCCCGGCCAATGCACCA	-2.33803141966199	0.000125450199969605	0.043254701065015	18	Yes	mature-tR0-Gly-GCC_CCA_end;mature-tR0-Gly-CCC_CCA_end	1186	1096	557	77	217	0
ATCCAGCGATCCGAGT	-2.3417309737749	0.000128879442315657	0.0440179897407726	16	Yes	mature-tR0-Gln-TTG;mature-tR0-Gln-CTG	1527	850	449	160	152	1003
CGAGCGGTCTAAGGC	-2.36814188537056	1.01041165134274e-05	0.00549796160167635	15	Yes	mature-tR0-Leu-AAG;mature-tR0-Leu-TAG;mature-tR0-Leu-CAG	1275	2430	431	156	349	175
ATCCCGGACGAGCCCCC	-2.41371303639137	3.19272846253658e-13	7.94903340715696e-10	17	Yes	mature-tR0-Pro-TGG;mature-tR0-Pro-CGG;mature-tR0-Pro-AGG	8842	5130	968	599	877	0
ATCCAGCGATCCGAGTT	-2.4685307011719	6.51535630348495e-07	0.00051861305410554	17	Yes	mature-tR0-Gln-CTG;mature-tR0-Gln-TTG	2629	965	1429	290	244	236
ATCTCGCTGGGGCCTCCA	-2.52234039920393	2.2797821106972e-06	0.00154722508435977	18	Yes	mature-tR0-Thr-TGT_CCA_end	1857	1798	638	178	282	173
CCTTCCAAGCAGTTGACCCGGGT	-2.5889329533094	0.000114403308181149	0.0403445438515534	23	Yes	mature-tR0-Gly-TCC	980	1112	217	42	195	72
CCCGGGTTTCGGCACCA	-2.60933553797524	6.92579958627645e-07	0.000548931190821817	17	Yes	mature-tR0-Phe-GAA_CCA_end;mature-tR0-Ser-GGA_CCA_end	1537	2456	579	68	365	200
CCGCCGCGGCCCGGGTT	-2.61415122547632	4.81034452940802e-06	0.00293889897844392	17	Yes	mature-tR0-Glu-TTC;mature-tR0-Glu-CTC	2056	791	743	123	144	208
GGTAGTGTGGCCGAGCGGTCT	-2.66155639403963	1.27286668770945e-06	0.000941870637084768	21	Yes	mature-tR0-Leu-AAG_5_end;mature-tR0-Leu-TAG_5_end	642	704	2448	144	224	171
GCGTTGGTGGTATAGTGGT	-2.69442730107088	1.42309056692772e-07	0.000136712384997665	19	Yes	mature-tR0-Gly-TCC_5_end	964	1418	2331	126	140	327
ATCCCGGACGAGCCCCCA	-2.72340903311603	1.40017557773899e-20	7.2912507491625e-17	18	Yes	mature-tR0-Pro-AGG_CCA_end;mature-tR0-Pro-CGG_CCA_end;mature-tR0-Pro-TGG_CCA_end	9450	8722	3091	901	1128	2587
TCTTGCGACCCGGGT	-2.74063417151416	2.76871581441874e-06	0.00181494207604233	15	Yes	mature-tR0-Gly-CCC	1827	1204	476	85	155	183
TTCTTGCGACCCGGG	-2.8666366967843	0.00010765543112212	0.0384516215813679	15	Yes	mature-tR0-Gly-CCC	1059	418	316	100	35	86
GCCCATAACCCAGAGGTCGATG	-2.88558334090637	5.01266545113103e-05	0.020643067721476	22	Yes	mature-tR0-iMet-CAT	416	1244	382	74	70	0
TCCCGGCCAATGCACCA	-2.88758735526299	5.7164256252176e-05	0.0229807734063131	17	Yes	mature-tR0-Gly-CCC_CCA_end;mature-tR0-Gly-GCC_CCA_end	976	689	325	98	39	259
TCCCTGGTGGTCTAGTGGTTAGGA	-3.12254199048193	2.42801008740419e-07	0.000220335983811196	24	Yes	mature-tR0-Glu-CTC_5_end	2074	1021	365	95	98	127
ATCAAGAGGTCCCCGGTT	-3.14184877080954	5.94849516814168e-05	0.0237764850985428	18	Yes	mature-tR0-Cys-GCA	719	501	366	84	36	2076
CTGTCACGCGGGAGA	-3.14214421031081	6.48927061974701e-05	0.0254451562042001	15	Yes	mature-tR0-Asp-GTC	298	442	760	37	56	612
TCCGGGTGCCCCCTCC	-3.22423933016305	7.62272407225728e-05	0.0289918472752289	16	Yes	mature-tR0-Cys-GCA	555	825	80	46	17	17481
ATTGGTGGTTCAGTGGTAGAATTCTC	-3.29983344190048	7.25994677055549e-06	0.00415315168489303	26	Yes	mature-tR0-Gly-GCC	580	894	512	33	91	50
TTGGTGGTTCAGTGGTAGAATTCTCG	-3.32306258165256	7.24999884959003e-08	7.39858399084811e-05	26	Yes	mature-tR0-Gly-GCC	2100	650	606	39	146	106
TCCGGGTGCCCCCTCCA	-3.37025424180466	5.41667876144692e-09	7.16892930900382e-06	17	Yes	mature-tR0-Cys-GCA_CCA_end	1637	1833	626	66	70	226
GTCACGGTGGCCGAG	-3.38450015287638	2.96991812980705e-05	0.0134101189849853	15	Yes	mature-tR0-Ser-CGA_5_end	306	385	741	53	26	2906
GCAGCGATGGCCGAGTGGTTAAGG	-3.42898407094779	6.582999937371e-09	8.53019008163662e-06	24	Yes	mature-tR0-Ser-TGA_5_end	1543	1824	532	45	197	20
CATATGTCTGCGTGGG	-3.50061422755233	0.000102948095948839	0.0371438920194931	16	Yes	mature-tR0-Leu-TAA	488	454	178	23	4	808
ATATGTCTGCGTGGGT	-3.74857486019151	7.72159889881253e-05	0.0292879352650058	16	Yes	mature-tR0-Leu-TAA	342	450	211	6	7	6
AAGCCAGGGATTGTGGGT	-3.76519846638136	2.17664768395535e-06	0.00148264831665414	18	Yes	mature-tR0-Arg-CCT	742	630	352	11	72	28
ACCAGAATGGCCGAG	-3.82024146875325	7.50752089138923e-08	7.6195183341952e-05	15	Yes	mature-tR0-Leu-TAA_5_end	863	332	1160	35	0	263
ACGCGAAAGGTCCCCGG	-3.85449988780627	5.89331290436228e-05	0.0236067219064099	17	Yes	mature-tR0-Val-CAC;mature-tR0-Val-AAC	269	480	234	0	27	2708
TCTCGGTGGAACCTCCA	-3.89930506238137	1.65519114811516e-05	0.00827135386384113	17	Yes	mature-tR0-Gln-CTG_CCA_end	335	687	178	4	14	42
ATTCTTGCGACCCGGG	-4.00553612334315	5.25542514547438e-06	0.00317944661976859	16	Yes	mature-tR0-Gly-CCC	800	326	200	0	0	57
GCGGAAGCGTGCTGGGCC	-4.06999367828606	6.0054754703665e-05	0.0239698486915008	18	Yes	mature-tR0-iMet-CAT	554	141	168	3	20	2394
ACCAGGATGGCCGAGT	-4.17525798592411	7.76069570617705e-08	7.81949736080432e-05	16	Yes	mature-tR0-Leu-TAA_5_end	516	342	1049	0	10	775
CTAGTGGTTAGGATTCGG	-4.47023230900481	0.000115507690269982	0.0406568098177708	18	Yes	mature-tR0-Ala-CGC;mature-tR0-Glu-CTC	325	149	140	3	0	14
GCAGCGATGGCCGAGT	-4.50779829700473	2.20760479635132e-07	0.000203314928343635	16	Yes	mature-tR0-Ser-TGA_5_end	239	367	813	0	15	35
GGCGGCCCGGGTTCGACTCC	-4.68555885070061	6.30625665296542e-06	0.00367278926449759	20	Yes	mature-tR0-Glu-TTC	447	384	93	8	3	16
GAGTATCCCCGCCTG	-4.8055889526856	0.000113926626764382	0.0402273619561763	15	Yes	mature-tR0-Asp-GTC	249	72	196	15	0	0
GTGGTTAGGATTCGG	-4.988569354937	6.89058762848632e-05	0.0267365356595842	15	Yes	mature-tR0-Glu-CTC;mature-tR0-Ala-CGC	324	238	0	0	0	24063
CAGAAGGTCCTGGGT	-5.52462874997419	2.54795092403953e-05	0.0118307731280466	15	Yes	mature-tR0-Val-TAC	149	330	57	0	0	2990
GTGGTTCAGTGGTAGAATTCTCGCCTGC	-6.59704506868974	0.000121887863382106	0.0422190501501566	28	Yes	mature-tR0-Gly-GCC	30	70	175	0	0	808
GTTCAGTGGTAGAATTCTCGCCTGCC	-8.83492892359891	0.000146069569766192	0.0482896281851218	26	Yes	mature-tR0-Gly-GCC	15	63	99	0	0	711
TGGAGGCGTGGGTTCGAAT	-8.881931759621	0.000118440483103516	0.0413786476609981	19	Yes	mature-tR0-Leu-CAA;mature-tR0-Leu-CAG	0	31	145	0	0	4678
TCAAGAGGTCCCCGG	-8.88614729463759	0.000116212977894278	0.0408792355763337	15	Yes	mature-tR0-Cys-GCA	35	38	109	0	0	4540
CAGTTGACCCGGGTTCG	-8.90941750772985	0.00010450405101921	0.0375810610320614	17	Yes	mature-tR0-Gly-TCC	102	91	8	0	0	362
GGGGGTATAGCTCAGTGGT	-8.96685216205864	7.96704439792194e-05	0.0299740544772325	19	Yes	mature-tR0-Cys-GCA_5_end	11	88	97	0	0	60
TGCGAGAGGTCCCGGGTTCA	-9.00451635646105	6.6325990718029e-05	0.0258978127317299	20	Yes	mature-tR0-Pro-AGG;mature-tR0-Pro-CGG;mature-tR0-Pro-TGG	118	98	0	0	0	1204
CTAAGCCAGGGATTGTGGG	-9.05916831766277	5.0324883187001e-05	0.0207093956151884	19	Yes	mature-tR0-Arg-CCT	64	89	62	0	0	1598
TCTAGTGGTTAGGATTCGGCGCTCT	-9.0607488782763	4.99108879288252e-05	0.020615157631625	25	Yes	mature-tR0-Glu-CTC	97	37	78	0	0	421
ACGCGGGAGGCCCGG	-9.10169811628045	4.02979226835548e-05	0.0172852960277521	15	Yes	mature-tR0-Gly-GCC	81	89	53	0	0	60
CAGTCGGTAGAGCATGGGACTCTT	-9.11393849480534	3.77495548134546e-05	0.0164197302470795	24	Yes	mature-tR0-Lys-CTT	109	52	62	0	0	483
GCATTGGTGGTTCAGTGGTAGAATTCTCGC	0.301267665864097	7.7591611338663e-08	7.81949736080432e-05	30	Yes	mature-tR0-Gly-GCC_5_end	142701	115018	87384	71824	141384	1038
TCCCTGGTGGTCTAGTGGTTAGGATTCGGCGCTC	0.490517400922188	2.74699551798636e-07	0.000244895749226691	34	Yes	mature-tR0-Glu-CTC_5_end	29470	25541	47442	23045	47067	52127
GTTTCCGTAGTGTAGTGGTTATCACGTTCGCCT	0.557301170703462	0.000126148784874918	0.0434411771679387	33	Yes	mature-tR0-Val-AAC_5_end;mature-tR0-Val-CAC_5_end	12468	15792	12870	9157	19140	1249
GCCCGGCTAGCTCAGTCGGTAGAGCATGAGA	0.935475414279091	1.37121100239559e-07	0.00013218426616346	31	Yes	mature-tR0-Lys-CTT_5_end	9583	8682	4902	8216	13167	14907
TCACGCGGGAGACCGGGGTTCGATTCCCCGACGGGG	0.94915606263829	2.70895065216126e-06	0.00178627244245885	36	Yes	mature-tR0-Asp-GTC	10205	4056	2996	12003	8378	7624
ACGCGGGAGACCGGGGTTCGATTCCCCGACGGGG	1.21245224215036	7.37963475857311e-06	0.00421296997041941	34	Yes	mature-tR0-Asp-GTC	3455	2511	1836	6648	5286	3606
CACGCGGGAGACCGGGGTTCGATTCCCCGACGGG	1.21626943161343	1.00747035251936e-05	0.00548731579394193	34	Yes	mature-tR0-Asp-GTC	4724	1479	1305	5069	6408	3538
GCATTGGTGGTTCAGTGGTAGAATTCTCGCCTGC	1.29596801071929	1.69980195455724e-06	0.00120497792755693	34	Yes	mature-tR0-Gly-GCC_5_end	1033	2244	3908	2432	6050	6631
GCATTGGTGGTTCAGTGGTAGAATTCTCGCCT	1.37761604780816	4.01052592654646e-56	7.20846755165297e-52	32	Yes	mature-tR0-Gly-GCC_5_end	22977	37102	27578	33981	94973	10910
TCACGCGGGAGACCGGGGTTCGATTCCCCGACGGGGA	1.77100398516168	0.000139610418824202	0.046640539663543	37	Yes	mature-tR0-Asp-GTC	686	673	179	1955	1209	936
TCCTCGTTAGTATAGTGGTTAGTATCCCCGCCTG	1.88160146947271	0.000126693454010532	0.043494963425834	34	Yes	mature-tR0-Asp-GTC_5_end	491	286	441	1094	1211	0
GCATGGGTGGTTCAGTGGTAGAATTCTCGCCT	2.02457701949682	3.90945248339349e-05	0.0168730273371187	32	Yes	mature-tR0-Gly-GCC_5_end	258	528	358	751	1899	1040
CACGCGGGAGACCGGGGTTCGATTCCCCGACGGGGA	2.0296354684992	1.57512693027794e-06	0.0011339082355059	36	Yes	mature-tR0-Asp-GTC	895	695	189	2575	2100	1442
CACGCGGGAGACCGGGGTTCGATTCCCCGACGG	2.09898132546505	7.58224537486286e-06	0.00430657624915376	33	Yes	mature-tR0-Asp-GTC	797	336	156	1370	2391	1018
GGTTCCATAGTGTAGCGGTTATCACGTCTGCTTT	2.15745427257758	5.08450742440112e-07	0.000420956417801198	34	Yes	mature-tR0-Val-TAC_5_end	588	642	349	1482	2658	1841
ACGCGGGAGACCGGGGTTCGATTCCCCGACG	2.43626831054853	3.59892858287034e-07	0.000313326096420238	31	Yes	mature-tR0-Asp-GTC	298	546	189	1925	1516	1260
AGCAGAGTGGCGCAGCGGAAGCGTGCTGGGCC	2.56314368521522	0.000107412604488084	0.0383894990985988	32	Yes	mature-tR0-iMet-CAT_5_end	43	183	160	506	808	2356
CACGCGGGAGACCGGGGTTCGATTCCCCGACG	2.69901496333491	1.2043036754773e-07	0.000117142651066025	32	Yes	mature-tR0-Asp-GTC	451	211	109	1318	1902	1060
GCCGTGATCGTATAGTGGTTAGTACTCTGCGTTG	2.70257834724906	7.46850620646853e-06	0.00425064042204515	34	Yes	mature-tR0-His-GTG	118	227	135	943	1164	620
CACGCGGGAGGCCCGGGTTCGGTTCCCGGCCAATG	2.91867612548307	1.17655616434222e-05	0.00623408119434979	35	Yes	mature-tR0-Gly-GCC	118	111	95	770	913	469
TCCCTGGTGGTCTAGTGGTTAGGATTCGGCGCTCTCAC	2.972543572786	0.000110672302434446	0.039252387137778	38	Yes	mature-tR0-Glu-CTC_5_end	79	61	63	504	703	3
CCACGCGGGAGGCCCGGGTTCGGTTCCCGGCCAATG	3.34273563934924	2.23397970399902e-07	0.000205066087524088	36	Yes	mature-tR0-Gly-GCC	161	106	29	913	1035	600
CCACGCGGGAGGCCCGGGTTCGATTCCCGGCCAATG	3.43412583808457	1.82883363450969e-05	0.00900183580223017	36	Yes	mature-tR0-Gly-GCC	43	66	35	587	399	340
GCATTGGTGGTTCAGTGGTAGAATTCTCGCCTGCCA	3.46882841371867	8.98542893059335e-05	0.03333283053154	36	Yes	mature-tR0-Gly-GCC_5_end	33	54	18	119	659	0
ACACGCAGAAGGTCCTGGGTTCGAGCCCCAGTGGAACCA	3.7342239608209	0.000116816097856951	0.0410455102402997	39	Yes	mature-tR0-Val-TAC_3_end	33	20	16	308	340	4
ACACGCAGAAGGTCCTGGGTTCGAGCCCCAGTGGAACCAC	4.13266507311266	3.743005356703e-05	0.0163202916851835	40	Yes	mature-tR0-Val-TAC	22	18	11	272	272	645
GCATTGGTGGTTCAGTGGTAGAATTCTCGCCTGCCAC	4.20285129801316	6.59635681028954e-05	0.0257743622098543	37	Yes	mature-tR0-Gly-GCC_5_end	15	18	9	160	343	4623
AGCAGAGTGGCGCAGCGGAAGCGTGCTGGGCCCATAACCCAGA	4.34753041703131	2.82788972805899e-06	0.0018515533226524	43	Yes	mature-tR0-iMet-CAT_5_end	28	11	18	174	635	239
AGCAGAGTGGCGCAGCGGAAGCGTGCTGGGCCCATAACCCAGAGG	4.81588013907619	0.000130255515830212	0.0443083460716946	45	Yes	mature-tR0-iMet-CAT_5_end	2	5	10	81	288	0
AGCAGAGTGGCGCAGCGGAAGCGTGCTGGGCCCATAACCCAGAG	4.87377109802706	4.70895336616894e-06	0.00289237597537375	44	Yes	mature-tR0-iMet-CAT_5_end	4	11	13	104	572	111

## Sheet: rsRNA
Sequence	logFC	PValue	adjpValue	Length	Match_Genome	Annotation	Reads_CD1	Reads_CD2	Reads_CD3	Reads_HFD1.1	Reads_HFD1.2	Reads_HFD1.3
ATCCTTCGATGTCGGCT	-0.867336729379961	8.68547852042342e-07	0.000675902482792559	17	Yes	28S-rR0	23719	16477	4645	6416	3620	9128
ATTAGTGACGCGCATGAATGGAT	-1.20890633355732	3.1843272775213e-06	0.0020425341419549	23	Yes	28S-rR0	5980	7215	6491	2743	2564	2028
ACTAATCCTAGCCCTAGCCCTAC	-1.2103684481793	1.72938472421851e-05	0.0085805509749538	23	Yes	16S-rR0	7134	3246	5705	2150	1058	2482
AAACGGGGTGCGGCCGG	-1.3532875946317	7.1861435546446e-06	0.00411515655417515	17	Yes	28S-rR0	12216	2213	390	1754	321	2309
ATCAAGAACGAAAGTCGGAGGTTCG	-1.44429573409084	2.74183434953854e-05	0.0125531855482282	25	Yes	18S-rR0	6081	4330	487	1333	1144	88
AATCGGTCGTCCGACCTGGGTATAGGGGC	-1.45843435132017	1.94198425496378e-05	0.00942873347345058	29	Yes	28S-rR0	3834	4118	2868	1861	809	709
AGGGCGCCCTGGAAT	-1.48161480401931	1.155670886349e-07	0.000112969870379789	15	Yes	28S-rR0	5308	5816	6444	1218	909	2851
TTCGATGTCGGCTCTTCCTATC	-1.96608534190688	0.000139622786049264	0.046640539663543	22	Yes	28S-rR0	1305	1436	1302	401	255	913
ATCAAGAACGAAAGTCGGAGGTTCGAAG	-1.96923755362253	4.41017477300076e-05	0.0185932544067454	28	Yes	18S-rR0	2585	1959	464	369	296	1190
GTTCGAGGCCAGCCTGGGCTACACATTTT	-10.5583558299388	4.56087468491311e-10	7.28158672116543e-07	29	Yes	4.5S-rR0	78	35	451	0	0	482
CGTGATGGGGATCGGGG	-2.04287596121495	4.67825963703406e-05	0.019534644704241	17	Yes	18S-rR0	2622	1876	134	345	231	2229
CGAGCGGTCGGCGTCCC	-2.04497856260834	1.83897432382387e-05	0.00901987767157941	17	Yes	18S-rR0	3173	1658	400	388	231	392
AGTACGCACGGCCGG	-2.11073804998748	5.14382706735903e-07	0.000424853795960403	15	Yes	18S-rR0	4789	1187	1416	469	234	650
AGCTGAGTGTCCCGCGGGGCC	-2.1211628964588	6.19985789602088e-05	0.0245347927633798	21	Yes	18S-rR0	1523	2386	180	381	200	1058
TTCTTGGACCGGCGCA	-2.1274327175434	3.21139049489448e-05	0.0143377778032873	16	Yes	18S-rR0	3073	1205	188	323	185	3734
AGTACGCACGGCCGGT	-2.15695660443459	1.8308023169459e-05	0.00900357231226025	16	Yes	18S-rR0	2961	1024	637	194	364	302
AGTACGCACGGCCGGTA	-2.17963540469596	0.000112045389394647	0.0397141033821905	17	Yes	18S-rR0	1819	675	866	164	224	337
AAGCGTTGGATTGTTCACCC	-2.18494382601787	6.56993049156106e-06	0.0038092607394307	20	Yes	28S-rR0	1567	2330	1184	416	262	262
AAGCGTTGGATTGTTCACC	-2.21148849382638	4.08747369175678e-05	0.0174387401708267	19	Yes	28S-rR0	1256	1701	903	219	300	591
AGTCGGAGGTTCGAA	-2.25474147490202	5.53228147444154e-05	0.0223210131407971	15	Yes	18S-rR0	2254	818	493	132	171	403
AGCGTTGGATTGTTCACC	-2.34332797591649	2.65213457549633e-15	8.54186626659422e-12	18	Yes	28S-rR0	7452	6967	4468	1073	1289	1032
TGCCCAGTGCTCTGAATGTC	-2.38695064987665	2.68714783400048e-05	0.0123739826580721	20	Yes	28S-rR0	709	1687	1043	213	253	10332
GCCCAGTGCTCTGAATGTC	-2.39484984792171	0.000129006940624709	0.0440179897407726	19	Yes	28S-rR0	599	1342	708	159	118	0
ACTAATCCTAGCCCTAGCCCT	-2.4046444819109	6.26069357949284e-47	8.94460475784004e-43	21	Yes	16S-rR0	33234	15326	21508	3634	1834	3032
AAAGTCGGAGGTTCGAAGA	-2.42500954664498	5.83984471996093e-07	0.000472264597897682	19	Yes	18S-rR0	2700	2152	575	255	307	271
AAGTCGGAGGTTCGAAGA	-2.47412112302896	4.92793438207348e-06	0.00300086968125413	18	Yes	18S-rR0	2057	1339	671	250	239	138
ATCGATGTGGTGCTCCGGAG	-2.48251864320646	1.79009656725596e-05	0.00883457844383833	20	Yes	45S-rR0	1354	761	1188	129	85	257
TTCTGATCGAGGCCC	-2.51938795302427	5.70139306910569e-06	0.0034048866068328	15	Yes	28S-rR0	1140	1806	868	166	231	167
CTAATCCTAGCCCTAGCCC	-2.52821646075276	5.53732316037242e-06	0.00331757106637409	19	Yes	16S-rR0	1369	1301	1088	217	48	251
AACGAAAGTCGGAGGTTCGAAG	-2.54717255921991	5.94533128220283e-07	0.000478710857966849	22	Yes	18S-rR0	3340	1250	318	282	87	286
CTTAGATGTCCGGGGCTGCA	-2.5530615769969	5.00729999660867e-05	0.020643067721476	20	Yes	18S-rR0	680	1431	600	183	156	0
CGAGCGGTCGGCGTCCCC	-2.56359318683865	3.63510427562179e-07	0.0003154896808931	18	Yes	18S-rR0	2571	1795	676	305	98	274
CGCGTCGGGGTCGGGGC	-2.58416047276237	1.38763499104553e-05	0.0071656750756317	17	Yes	28S-rR0	749	654	1648	209	112	126
AAAGTCGGAGGTTCGAAGACGATCAGATAC	-2.59640096509375	2.74635636935085e-06	0.00180586168366058	30	Yes	18S-rR0	910	2322	708	143	320	109
GTACGCACGGCCGGTA	-2.61112634101304	1.37804419978819e-05	0.00712274997847849	16	Yes	18S-rR0	1360	964	788	66	173	181
GTACGCACGGCCGGT	-2.62385619900903	2.18251544893884e-06	0.00148483001586598	15	Yes	18S-rR0	1941	993	963	103	158	248
ATCGATGTGGTGCTCCGGAGTTCTCTTCGGGCCAGGG	-2.70620168653726	0.000117250514317811	0.0411403111289303	37	Yes	45S-rR0	1035	693	314	127	76	710
CGTAAGGGAAAGTTGAAAAGA	-2.75335892459929	5.14579810640279e-06	0.00312329765458232	21	Yes	28S-rR0	565	1643	939	208	64	117
AAGTCGGAGGTTCGAAG	-2.85880528146882	2.01926553361747e-07	0.000187519093779386	17	Yes	18S-rR0	2599	1290	380	181	69	209
GAAATTTCGGTTGGG	-2.87247876128187	3.2196715549426e-06	0.00206203309620514	15	Yes	16S-rR0	887	1291	862	73	151	126
ACCATCTGTGGGATTATGACTGAACGCC	-2.91445845047269	8.47429199217696e-06	0.00475029251018217	28	Yes	28S-rR0	832	1029	727	126	97	72
AACTGCGAATGGCTCAT	-2.93278895981095	7.82894046130645e-05	0.0295742870212565	17	Yes	18S-rR0	710	500	557	82	44	45
TTCTGATCGAGGCCCAGCC	-2.93406761732613	3.06363970699273e-05	0.0137441981347768	19	Yes	28S-rR0	627	1038	455	42	100	0
TCCCGTGGAGCAGAA	-2.94417661636644	3.73227916401225e-07	0.000322274010526159	15	Yes	28S-rR0	1852	1260	619	192	95	115
TAAGTTTGAAATTTCGGTTGGG	-2.96202675271385	4.56024197903153e-06	0.00281698584068357	22	Yes	16S-rR0	455	993	1198	0	206	98
TCCCGTGGAGCAGAAG	-2.99430459289257	5.30621050388709e-05	0.0215650432579201	16	Yes	28S-rR0	1012	519	310	124	47	12943
GATGTCGGCTCTTCCTATC	-3.00887506917392	4.74110659309106e-06	0.00290615751661651	19	Yes	28S-rR0	715	1344	573	165	79	40
GCGTCGGGGTCGGGGC	-3.0159323916858	2.7165736512546e-05	0.0124477604666328	16	Yes	28S-rR0	449	263	1187	68	98	3261
ATTCAATGAAGCGCGGGTAAACGGC	-3.05807343251406	2.22077583419821e-05	0.01050419428741	25	Yes	28S-rR0	403	999	596	126	57	28
TAATCCTAGCCCTAGCCC	-3.18105348804485	3.46903255040616e-07	0.000302963988520503	18	Yes	16S-rR0	1078	960	1058	172	13	96
ACCATCTGTGGGATTATGACTGAA	-3.28687716051263	7.04331156037915e-05	0.0272257474525026	24	Yes	28S-rR0	483	549	336	58	15	376
ATCGATGTGGTGCTCCGGAGT	-3.28883501616195	1.47936433792464e-06	0.00107329038469821	21	Yes	45S-rR0	888	372	1129	82	29	91
TGGTGCGGACCAGGGGAATCC	-3.30471058644034	4.28412883024849e-06	0.00267010485785924	21	Yes	28S-rR0	713	465	894	131	32	24
CGAACGTCTGCCCTATC	-3.30860098432708	1.41293578304041e-06	0.00103371430598524	17	Yes	18S-rR0	978	615	823	92	100	29
TCGAGGCCCTGTAATTGGAATGAGTCCACT	-3.39186728541676	1.81306161897539e-05	0.00893999826085752	30	Yes	18S-rR0	642	665	319	40	33	52
ACCGCAGCTAGGAATAATGGAA	-3.41926442547039	1.12979935499267e-05	0.00604719406924465	22	Yes	18S-rR0	347	683	643	73	37	27
AAAGTCGGAGGTTCGAAGACGATCAGAT	-3.42518280445887	3.83780792882549e-05	0.0166411533063212	28	Yes	18S-rR0	485	429	448	45	42	1974
TGAAATTTCGGTTGGG	-3.65977603317827	9.54728781825472e-06	0.0052307308745854	16	Yes	16S-rR0	380	822	295	18	26	49
ATCGATGTGGTGCTCCGGAGTTCTCT	-3.70381488154307	3.61435983232688e-05	0.0159200407507843	26	Yes	45S-rR0	755	210	210	45	1	84
CGCAGCAGGTCTCCAAGGTGAAC	-3.75246800089638	9.20468092112972e-06	0.0050931044314243	23	Yes	28S-rR0	346	445	572	53	20	16
CGCAGCTAGGAATAATGGAA	-3.77349771470243	1.34397859006681e-05	0.00697254590874606	20	Yes	18S-rR0	242	520	516	19	12	43
ATCGATGTGGTGCTCCGG	-3.79200150868357	4.67646619656971e-05	0.019534644704241	18	Yes	45S-rR0	641	259	169	33	28	2395
CGCGCGGGCGGGGCCGGGG	-4.05492535444216	1.21668672497565e-05	0.00640761508779945	19	Yes	28S-rR0	128	300	647	17	7	29
CCAACTTCTTAGAGGGACAAGTGGCGT	-4.15431409003399	1.02152261876666e-05	0.00553679171158169	27	Yes	18S-rR0	749	179	180	7	30	16
TAAAGTTGCTGCAGT	-4.16788936793443	4.04137365359378e-05	0.0173083242586158	15	Yes	18S-rR0	339	229	292	3	23	32507
CCGCAGCAGGTCTCCAAGGTGAA	-4.19959142409079	1.06824841526568e-05	0.0057564539120105	23	Yes	28S-rR0	428	326	304	24	13	12
GCTCCCTCGCTGCGATCTATTGAAAGTC	-4.23568456243133	3.09429496877443e-05	0.0138705568274451	28	Yes	28S-rR0	306	415	168	37	0	18848
CATCTGTGGGATTATGACTGAACGCC	-4.28701374935124	5.2990038293719e-05	0.0215583257942382	26	Yes	28S-rR0	349	306	130	17	14	0
GTTTGAAATTTCGGTTGGG	-4.38982135607594	4.94058261463142e-05	0.0204216856605822	19	Yes	16S-rR0	121	140	441	15	12	4
CCAACTTCTTAGAGGGACAAGTGGCGTTC	-4.40718096950833	1.50943164491522e-07	0.000143277720311808	29	Yes	18S-rR0	898	250	474	1	24	36
CAGCCTGGGCTACACATTT	-4.7678562084135	1.16394574702121e-05	0.0061824492924952	19	Yes	4.5S-rR0	225	399	171	14	0	9
TCGGTTGGGGTGACCTCGGAGAA	-4.78836349335313	5.28821280835184e-05	0.021539029931912	23	Yes	16S-rR0	128	143	311	8	8	2658
AACGAGGAATTCCCAGTAAGTGCGG	-4.85447363601273	0.000134820255002856	0.0453626194957977	25	Yes	18S-rR0	177	191	136	4	0	1757
AAAGAGGGACAGCTCTTCTGGAACGGA	-4.88802794713557	2.66233363274116e-05	0.0122800138810186	27	Yes	16S-rR0	201	346	112	14	0	0
TCTCGTCTGATCTCGGAAGCTAAGCAGGG	-4.89073717699139	2.30448769000296e-05	0.0108357594598544	29	Yes	5S-rR0	120	132	381	1	0	15
CGTAGTTGGATCTTGGGA	-4.9237302410971	0.000121141824728277	0.0420816791273993	18	Yes	18S-rR0	135	252	113	14	0	173
TACCATCTGTGGGATTATGACTGAACGCC	-4.93109209054658	1.14035827496299e-05	0.00609112282470479	29	Yes	28S-rR0	396	280	77	0	0	17
TAAAGTTGCTGCAGTT	-4.94396961299927	1.15407721694802e-06	0.00086546471670426	16	Yes	18S-rR0	484	234	279	9	20	1
CCGCCGGGGTCGGCC	-5.01296970479956	0.00010948866552241	0.0389317099824069	15	Yes	18S-rR0	210	104	171	0	1	367
CCAGCCTGGGCTACACATTT	-5.09544258910064	3.69665333130874e-07	0.000319835135042223	20	Yes	4.5S-rR0	218	387	452	9	0	15
AGCTCCCTCGCTGCGATCTATTGAAAGTC	-5.52313456117064	2.58211766183586e-06	0.0017107373840646	29	Yes	28S-rR0	190	356	173	0	0	11
AAAGTATTGGAGAAAGAAATTCGTA	-5.53424956738766	0.000122562319911909	0.0423901297527726	25	Yes	16S-rR0	109	188	100	0	0	79
TTGATCAACGGACCAAGTTACCCTAGGG	-5.60158028080575	1.39829092366396e-06	0.00102514963125832	28	Yes	16S-rR0	333	202	216	0	0	11
ATCGATGTGGTGCTCCGGAGTTCTCTTCGGGCCAGG	-5.63706167933211	3.33317222396446e-05	0.0148339475357089	36	Yes	45S-rR0	235	252	7	8	0	1334
AAAGTTGCTGCAGTT	-5.64044660606436	2.77676537368978e-05	0.0127026756860937	15	Yes	18S-rR0	176	118	191	0	0	3143
ATTAAAGTTGCTGCAGTT	-5.82276929403494	5.38122656577734e-07	0.000442236818611427	18	Yes	18S-rR0	227	363	193	6	1	4
GCACGGCCGGTACAGTGAAACT	-5.86627698754779	5.07675415639319e-05	0.0208162440684965	22	Yes	18S-rR0	155	112	143	0	0	1159
TCTCTTCGGGCCAGGG	-6.15448750438997	6.57177407170945e-05	0.0257143735605041	16	Yes	45S-rR0	91	119	139	4	0	302
AAGGTTTCCGTAGGT	-6.63511977887412	9.76856208224275e-05	0.0355980713316209	15	Yes	18S-rR0	19	130	140	0	0	12731
TCCTACGTGATCTGAGTT	-6.79270867325408	3.85689781702708e-05	0.0167109245308656	18	Yes	16S-rR0	123	105	101	0	0	222
GGGCCGCCCTCTCGCCCGTCACGTTGAACGC	-8.82727895992125	0.000151077722072942	0.049721793243841	31	Yes	28S-rR0	141	33	14	0	0	70
GGAGTCGGGTTGCTTGGG	-8.8427913607523	0.000141091709889667	0.0469622997810176	18	Yes	28S-rR0	8	35	130	0	0	701
AGATATATTTTGATCAACGGACCA	-8.8436368431215	0.000140613918433134	0.0468872945611957	24	Yes	16S-rR0	75	72	40	0	0	66211
CCCTTAGATGTCCGGGGCTGC	-8.88493981371886	0.000116906665143588	0.0410455102402997	21	Yes	18S-rR0	96	103	0	0	0	7089
GTAGTGGTGGCGCACGCCGGTAGGATTT	-8.89140669243756	0.000113463521739724	0.0401146825369015	28	Yes	4.5S-rR0	39	37	107	0	0	949
TTTAACGGCCGCGGTAT	-8.89222329069763	0.00011305360926287	0.0399951368540815	17	Yes	16S-rR0	56	49	82	0	0	555
TCGATGTGGTGCTCCGGAGTTCTCTTCGGGCCAGGG	-8.89373105504796	0.000112302051905046	0.0397797713292898	36	Yes	45S-rR0	89	74	32	0	0	470
TATCTAGAGGAAGTA	-8.90132621514952	0.000108467229671265	0.0386672141398159	15	Yes	18S-rR0	74	102	22	0	0	1257
CTTAATTAGGGACTAGCATG	-8.92827724523878	9.56786131556832e-05	0.0349810803570965	20	Yes	16S-rR0	23	48	116	0	0	5331
AATTCACCAAGCGTTGGATTGTTCACCCA	-8.9390110584214	9.09990611169769e-05	0.0336403761180882	29	Yes	28S-rR0	105	49	45	0	0	437
TCAATGAAGCGCGGGTAAACGGC	-8.94430999619774	8.87614416719431e-05	0.0329493588842039	23	Yes	28S-rR0	54	132	19	0	0	2700
CATGTTGGAACAATGTAGGT	-8.95183064575653	8.5624500549941e-05	0.0320625775950414	20	Yes	28S-rR0	0	125	73	0	0	4012
AATGAGTCCACTTTAAATCC	-8.96756712665266	7.94247048045187e-05	0.0299220089722987	20	Yes	18S-rR0	0	174	33	0	0	182
TGAACAGCAGTTGAACATGGGT	-8.97771547128428	7.55832705003537e-05	0.0288256279877427	22	Yes	28S-rR0	26	44	123	0	0	146
AGCGATTTGTCTGGTTAATTC	-9.01393457076314	6.32710794659261e-05	0.0249674311385406	21	Yes	18S-rR0	73	60	73	0	0	103
GGTGTCCTAAGGCGAGCTCAGGGAGGACAGA	-9.0530606354547	5.19281346847123e-05	0.0212124907367851	31	Yes	28S-rR0	105	51	58	0	0	526
CGCGGGTAAACGGCGGGAGTAACTATGAC	-9.06860336610625	4.79405150087594e-05	0.0199343101177095	29	Yes	28S-rR0	74	113	34	0	0	163
AATAACAATACAGGACTCTT	-9.07348951947756	4.67143989231415e-05	0.019534644704241	20	Yes	18S-rR0	0	84	124	0	0	252
TCTCGTCTGATCTCGGAAGCTAAGCAGG	-9.09731393405722	4.12360294215458e-05	0.0175525616756234	28	Yes	5S-rR0	87	46	84	0	0	3260
GTAGTGGTGGCGCACGCCGGTAGGATT	-9.11687774673834	3.71318257786728e-05	0.0162397817940492	27	Yes	4.5S-rR0	17	13	176	0	0	1087
TTAGGGTTTACGACCTCGATGTTGGATC	-9.12565469343155	3.54339642556e-05	0.0156445725384927	28	Yes	16S-rR0	16	89	113	0	0	300
ACGCACGGCCGGTACAGTGAAACTGC	-9.16481426289517	2.86038577689269e-05	0.0129892286147257	26	Yes	18S-rR0	136	47	50	0	0	4629
AGAACGAAAGTCGGAGGTTCG	0.904762015364953	2.55271904647965e-06	0.00169529144875804	21	Yes	18S-rR0	12844	5907	1282	8964	8481	12387
CTCGCTGCGATCTATTGAAAGTCAGCCCTCGACACAAGGGTT	1.45940058303298	9.89790087834745e-06	0.00539629294560315	42	Yes	28S-rR0	2257	1705	426	4262	2985	2749
AAGGGGGCCGCCCTCTCGCCCGTCACGTTGAACG	1.51244934006527	4.80107998092713e-05	0.0199357754070634	34	Yes	28S-rR0	2720	313	136	2851	555	525
TGTCCGGGGCTGCACGCGCG	1.59059497223147	2.4488974493774e-05	0.0114375621946236	20	Yes	18S-rR0	1837	588	485	2615	1354	3026
CTCGCTGCGATCTATTGAAAGTCAGCCCTCGACACAAGGGT	1.66619514499654	0.000121484292524396	0.0421647196925798	41	Yes	28S-rR0	1083	700	179	2330	1529	3516
TAACGAACGAGACTCTGGC	1.89551941012137	6.23651347203089e-05	0.0246353886840842	19	Yes	18S-rR0	413	502	426	878	1917	323
AACGATCTCAACCTATTCTCAAACTTT	1.98062542491982	6.37341382469428e-05	0.025096837095275	27	Yes	28S-rR0	610	342	215	1924	1371	336
ATCCTTCGATGTCGGCTCTTCCTATCA	2.0088040528031	8.40185300211634e-07	0.000654745241153735	27	Yes	28S-rR0	825	869	276	3711	2477	758
ACTAATCCTAGCCCTAGCCCTACACAAATATAATTATA	2.01200938642643	4.03411275883415e-06	0.00253698339514086	38	Yes	16S-rR0	1077	246	296	2811	1197	1459
TTAAGCAGGAGGTGTCAGAAA	2.01303897964991	1.85796019239889e-05	0.00909698453077976	21	Yes	28S-rR0	557	512	251	1342	1120	1828
AAGGGGGCCGCCCTCTCGCCCGTCACGTTGAAC	2.08965654266436	2.01162205464578e-06	0.0013854829327912	33	Yes	28S-rR0	1299	144	111	2309	560	2290
ACTAATCCTAGCCCTAGCCCTACACAAATATAATTATACTATTAT	2.17721567032172	1.15505405154553e-05	0.0061469395127092	45	Yes	16S-rR0	303	185	520	1684	655	1515
TTAAGCAGGAGGTGTCAGAAAA	2.18738398574689	7.44210772914144e-06	0.00423994683599215	22	Yes	28S-rR0	446	431	222	1205	1419	1510
AGAGAGAGTTCAAGAGGGCGTGAAACCGTTAAGAGGT	2.33234436537561	3.72187038289107e-05	0.0162522645661683	37	Yes	28S-rR0	151	194	320	747	1895	402
ACGGGCTTGGCGGAATC	2.36815422408915	0.000104543593028761	0.0375810610320614	17	Yes	28S-rR0	290	125	131	977	332	8026
ACGGGCTTGGCGGAAT	2.37295114246384	1.23339880601301e-07	0.000119727784097978	16	Yes	28S-rR0	769	251	246	1274	779	2985
ATTAGTGACGCGCATGAATGGATGAACGAGATT	2.37409362455758	1.93560326886496e-05	0.00941098416560966	33	Yes	28S-rR0	241	144	302	951	776	1257
AACGATCTCAACCTATTCTCAAACTTTA	2.51348137414527	4.00191641397002e-05	0.017178950744992	28	Yes	28S-rR0	249	190	75	1117	1058	431
ATTAGTGACGCGCATGAATGGATGAACGAGATTCCCA	2.55789858041353	4.83186593654486e-06	0.00294881421816367	37	Yes	28S-rR0	252	164	211	616	1235	1252
AACGATCTCAACCTATTCTCAAACTTTAA	2.63968235259993	1.72370301679926e-05	0.00855998292273068	29	Yes	28S-rR0	193	255	37	877	1361	399
ATTAGTGACGCGCATGAATGGATGAACG	2.65914023699206	2.69008033596691e-05	0.0123772573278068	28	Yes	28S-rR0	189	107	128	760	637	619
ATTAGTGACGCGCATGAATGGATGAACGAGATTCCCACT	2.67174279949134	8.88769089372204e-08	8.89072260156729e-05	39	Yes	28S-rR0	166	276	349	1391	2093	228
ACTAATCCTAGCCCTAGCCCTACACAAATATAATTATACTA	2.74419855023988	7.41747607052146e-06	0.00423023898846863	41	Yes	16S-rR0	215	78	152	1421	489	646
TGACCTTTTGGGTTTTAAGCAGGAGGT	2.79719650924672	3.1805562045326e-06	0.0020425341419549	27	Yes	28S-rR0	54	207	194	653	644	1286
GCGGGTGTTGACGCGATGTG	2.90673625644998	3.54216181946749e-11	6.852976195101e-08	20	Yes	28S-rR0	833	212	19	2325	533	0
AACGATCTCAACCTATT	3.03645705883453	6.8420290678763e-05	0.026572620046202	17	Yes	28S-rR0	76	112	21	328	727	571
GCCCGAGGTGGGATCCCGAGGCCTCT	3.03836371418034	1.45920893452012e-07	0.000139460827825946	26	Yes	28S-rR0	191	137	129	938	798	1328
CGCTGCGATCTATTGAAAGTCAGCCCTCGACACAAGGGTTT	3.16596418783362	4.21875741279805e-05	0.0179028898921321	41	Yes	28S-rR0	62	92	32	528	527	7624
TGGGAGACCGCCTGGGAATACCGGGTGCTGTAGGCTT	3.21847150703387	0.000124023760651747	0.0428158607171913	37	Yes	5S-rR0	38	58	41	296	664	95
TGACCTTTTGGGTTTTAAGCAGGAGGTGTCAGAAAAGTT	3.24390236414156	1.43523807811772e-05	0.00735018662450746	39	Yes	28S-rR0	13	97	82	150	807	611
ACCTCCCGTGGAGCAGAAGGGCAAAAGCTCGCTTGATCTTGAT	3.25040237785192	1.28520556758252e-05	0.00668630896546501	43	Yes	28S-rR0	102	57	40	498	834	334
TAACGAACGAGACTCTGGCATGCTAACTA	3.29544016148644	2.67692448604313e-05	0.0123371013596226	29	Yes	18S-rR0	68	60	37	463	543	2548
AGGAGTCTAACGCGTGCGCGAGTCAGGGGCT	3.34390774329991	0.000118389361505269	0.0413786476609981	31	Yes	28S-rR0	40	63	16	430	200	1131
TCCTAGCCCTAGCCCTACACAAATATAATTATACTATTATATA	3.34684930692609	7.54216181211221e-05	0.0287855214670634	43	Yes	16S-rR0	41	44	40	332	442	146
GAGAGAGTTCAAGAGGGCGTGAAACCGTTAAGAG	3.37528326313504	0.000109408513843527	0.0389280522531769	34	Yes	28S-rR0	38	50	26	375	445	0
AACACGGGAAACCTCACCCGGCCCGGACACGGACAGGATTGACA	3.61223536250242	8.74672560136432e-05	0.0326101826505735	44	Yes	18S-rR0	13	36	35	450	336	51
ACGGGCTTGGCGGAATCAGCGG	3.65791279749398	1.99056813351524e-06	0.00137437999790998	22	Yes	28S-rR0	69	60	20	599	73	766
TAGGACCGCGGTTCTATTTTGTTGGTTTTCGGAACTGAGGC	3.70331172534918	6.12067884199394e-06	0.0035860999410837	41	Yes	18S-rR0	16	73	29	624	561	182
AACCTCCCGTGGAGCAGAAGGGCAAAAGCTCGCTTGATCTTGAT	3.79131402610237	5.00955853078976e-05	0.020643067721476	44	Yes	28S-rR0	36	29	11	351	308	29
TAGGACCGCGGTTCTATTTTGTTGGTTTTCGGAACTGAGGCC	3.81519353273987	1.8366169090431e-05	0.00901625176695791	42	Yes	18S-rR0	25	41	20	557	351	157
AACCTCCCGTGGAGCAGAAGGGCAAAAGCTCGCTTGATCTTGATT	3.87752121831091	6.51088442028815e-05	0.0255119528139266	45	Yes	28S-rR0	26	16	21	354	186	15503
TTCTGGGTCGGGGTTTCGTACGTAGCAGAGCAGCTCC	3.87956069879271	0.000129343776415667	0.0440519919199545	37	Yes	28S-rR0	24	21	11	291	182	817
ACGACCTGCTTCTGGGTCGGGGTTTCGTACGTAGCAGAGCAGC	3.88776053031658	5.27076078169011e-06	0.00318526594354654	43	Yes	28S-rR0	39	42	14	505	322	343
AACACGGGAAACCTCACCCGGCCCGGACACGGACAGGATTGAC	3.91684365390436	1.50608636507139e-05	0.00764277105422704	43	Yes	18S-rR0	25	36	17	533	350	153
ATCCTTCGATGTCGGCTCTTCCTATCATTGTGAAGCAGAATT	3.93267803058643	4.85391173923378e-06	0.00295902744199526	42	Yes	28S-rR0	45	36	10	262	514	384
AACTTTGAAGGCCGAAGTGGAGAAGGGTTCCATGTGAAC	3.95047776993129	3.42721779913492e-05	0.0152160277729082	39	Yes	28S-rR0	33	16	16	483	290	143
ACGGGCTTGGCGGAATCAGCGGGGAAAGAA	3.95800782166284	5.87816984264907e-05	0.0235799672759225	30	Yes	28S-rR0	24	1	31	319	230	51
CACGGGAAACCTCACCCGGCCCGGACACGGACAGGATTGACA	4.04490438558261	1.24978329207595e-05	0.00653865495316243	42	Yes	18S-rR0	33	27	9	398	380	203
GATGGGAGACCGCCTGGGAATACCGGGTGCTGTAGGCTT	4.0940703384792	2.40511593193842e-06	0.00161264325645821	39	Yes	5S-rR0	9	34	35	325	627	259
AGTGCCAGGTGGGGAGTTTGACTGGGGCGGTACACCTGTC	4.11693689871374	5.57555452518603e-05	0.0224630746629675	40	Yes	28S-rR0	20	15	13	507	145	838
ACACGGGAAACCTCACCCGGCCCGGACACGGACAGGATTGAC	4.11897268189484	6.07731233239453e-05	0.0242001961619001	42	Yes	18S-rR0	18	23	7	326	279	0
CACCGCCCGTCGCTACTACCG	4.20246192104534	0.000108665028642059	0.038712958637512	21	Yes	18S-rR0	23	16	0	401	145	52
ACGGGCTTGGCGGAATCAGCGGGGAAAGAAGACCCTG	4.21301407659409	5.69781753119715e-06	0.0034048866068328	37	Yes	28S-rR0	41	9	12	318	383	282
ACGGGAAACCTCACCCGGCCCGGACACGGACAGGATTGACA	4.28584849517608	4.49942379754981e-05	0.01894961410247	41	Yes	18S-rR0	9	25	7	312	205	2815
CTCCTACTTGGATAACTGTGGTAATTCTAGAGCTA	4.38699824113384	9.84843929079175e-05	0.0358222682006966	35	Yes	18S-rR0	6	20	5	130	200	363
GAGCACGAGCGTACGCGTTAGGACCCGAAAGATGGTG	4.39551872390801	8.73834902485689e-06	0.00487379448764766	37	Yes	28S-rR0	9	14	22	352	259	227
AACTTTGAAGGCCGAAGTGGAGAAGGGTTCCATGTGAA	4.41414664065344	1.07200892165315e-06	0.000810464926805862	38	Yes	28S-rR0	13	23	23	710	296	130
ACGGGAAACCTCACCCGGCCCGGACACGGACAGGATTGACAG	4.4227003016056	7.1898662864715e-05	0.02770485197897	42	Yes	18S-rR0	19	5	7	186	249	2004
GAGAACTTTGAAGGCCGAAGTGGAGAAGGGTTCCATGTGAAC	4.48109014196156	2.4702962966938e-06	0.00165141053810276	42	Yes	28S-rR0	15	22	13	582	243	154
GGATGGGAGACCGCCTGGGAATACCGGGTGCTGTAGGCTT	4.50561787396914	2.08023218421535e-05	0.00998102257568669	40	Yes	5S-rR0	14	18	4	252	349	120
ACGGGCTTGGCGGAATCAGCGGGGAAAGAAGACCCTGT	4.53025658596186	3.75523970182951e-06	0.00238041184239179	38	Yes	28S-rR0	17	12	15	260	412	229
ATCGAACCATCTAGTAGCTGGTTCCCTCCGAAGTTTCCCT	4.56997057007887	0.000120383460046964	0.0419490056932881	40	Yes	28S-rR0	7	4	12	249	95	0
ATAACGAACGAGACTCTGGCATGCTAACTAGTTACGCGAC	4.59976407807782	5.85221914304143e-05	0.0234927808667958	40	Yes	18S-rR0	12	15	0	67	351	1830
CACGGGAAACCTCACCCGGCCCGGACACGGACAGGATTGACAG	4.61018586477369	4.20079241858478e-06	0.00262698039024832	43	Yes	18S-rR0	21	18	2	417	233	192
CGGGAAACCTCACCCGGCCCGGACACGGACAGGATTGACAG	4.61995166933789	5.07713269963329e-05	0.0208162440684965	41	Yes	18S-rR0	12	15	0	192	153	1038
ACACGGGAAACCTCACCCGGCCCGGACACGGACAGGATTGACA	4.63622266959744	1.72151132333173e-06	0.00121727017036448	43	Yes	18S-rR0	14	29	2	353	347	239
GAGAGAGTTCAAGAGGGCGTGAAACCGTTAAGAGG	4.65588192996028	6.58820404877443e-07	0.000523663539791244	35	Yes	28S-rR0	22	15	11	491	365	204
TTGGTGGAGCGATTTGTCTGGTTAAT	4.66617407122938	0.000120349186082588	0.0419490056932881	26	Yes	18S-rR0	13	9	0	63	186	311
AAACCTCCCGTGGAGCAGAAGGGCAAAAGCTCGCTTGATCTTGA	4.6670881222789	3.89015408453486e-06	0.00245476212272025	44	Yes	28S-rR0	6	16	15	289	336	210
TTAGTGACGCGCATGAATGGATGAACGAGATTCCCACTG	4.70425063240001	0.000126350955400486	0.0434411771679387	39	Yes	28S-rR0	3	18	0	132	220	485
TACTTGGATGGGAGACCGCCTGGGAATACCGGGTGCTGTAGGCTT	4.73924025501612	2.8740868786358e-06	0.00187959209848249	45	Yes	5S-rR0	2	23	11	200	508	164
GTGCATGGCCGTTCTTAGTTGGTGGAGCGATTTGTCTGGT	4.79846294045706	4.09863976940645e-05	0.0174596413846757	40	Yes	18S-rR0	0	15	7	172	303	720
ACGGGCTTGGCGGAATCAGCGGGGAAAGAAGACCCTGTT	4.8165008542408	2.62224361529812e-07	0.000234901594856585	39	Yes	28S-rR0	17	15	12	388	391	293
AACTTTGAAGGCCGAAGTGGAGAAGGGTTCCATGTG	4.81701938208208	1.60591534323069e-05	0.00805400513136553	36	Yes	28S-rR0	11	6	8	304	269	75
AACGATCTCAACCTAT	4.84096227114469	2.38372526421829e-07	0.000217290216418192	16	Yes	28S-rR0	17	28	0	297	363	383
GAGCACGAGCGTACGCGTTAGGACCCGAAAGATGGT	4.85366741094366	1.28105460698766e-05	0.00667718256751594	36	Yes	28S-rR0	10	16	0	343	153	135
ACTTGGATGGGAGACCGCCTGGGAATACCGGGTGCTGTAGGCTT	4.87784572745277	4.09603450943847e-06	0.0025701232751284	44	Yes	5S-rR0	7	13	9	230	329	193
TTGGATGGGAGACCGCCTGGGAATACCGGGTGCTGTAGGCTT	4.88736769594676	6.93591903220546e-06	0.00400174665986001	42	Yes	5S-rR0	3	19	5	174	320	195
CTTGGATGGGAGACCGCCTGGGAATACCGGGTGCTGTAGGCTT	4.93064967843735	5.56069304089315e-06	0.00332799415193905	43	Yes	5S-rR0	10	8	8	304	204	182
CTCGCTCCTCTCCTACTTGGATAACTGTGGTAATTCTAGAGC	4.96354918205061	6.88299271443542e-06	0.0039783555088758	42	Yes	18S-rR0	7	16	2	320	166	169
AAACCACAGCCAAGGGAACGGGCTTGGCGGAATCAGCGGGGAAA	4.96461847910183	0.000132658118412961	0.0449063043733402	44	Yes	28S-rR0	3	9	3	200	114	540
GGGGAGGTGGAGCACGAGCGTACGCGTTAGGACC	4.99439646280297	1.85125741003239e-07	0.00017307082488187	34	Yes	28S-rR0	5	34	0	656	211	174
CACGGGAAACCTCACCCGGCCCGGACACGGACAGGATTGACAGAT	5.01052238325306	9.4919373796667e-05	0.0347719433831459	45	Yes	18S-rR0	7	4	4	151	186	4760
TTAGTTGGTGGAGCGATTTGTCTGGTTAATTCCG	5.03482235501998	6.84357396333385e-05	0.026572620046202	34	Yes	18S-rR0	10	6	0	190	163	563
GTGCCAGGTGGGGAGTTTGACTGGGGCGGTACACCTGT	5.08914851447245	2.4549509716895e-05	0.0114558279088678	38	Yes	28S-rR0	4	6	7	350	52	108
GAGGTGGAGCACGAGCGTACGCGTTAGGACC	5.13406691258861	3.76450679498632e-05	0.0163998869515123	31	Yes	28S-rR0	0	16	0	275	141	0
GATGGGAGACCGCCTGGGAATACCGGGTGCTGTAGGCTTT	5.20169048233248	3.9790454123292e-05	0.0171071320470348	40	Yes	5S-rR0	4	5	5	87	340	98
AACACGGGAAACCTCACCCGGCCCGGACACGGACAGGATTGACAG	5.21225912700593	2.72602361805379e-07	0.000243415560856313	45	Yes	18S-rR0	11	17	1	498	315	122
ACACGGGAAACCTCACCCGGCCCGGACACGGACAGGATTGACAG	5.25246820067838	1.21173030414912e-06	0.000902625679370116	44	Yes	18S-rR0	13	9	1	338	206	194
ACGGGCTTGGCGGAATCAGCGGGGAAAGAAGAC	5.34960619912957	1.17389976097882e-05	0.00622938293161702	33	Yes	28S-rR0	7	8	0	255	152	116
ACACGGGAAACCTCACCCGGCCCGGACACGGACAGGATTGACAGA	5.43648096821221	6.36696618871401e-05	0.0250891788591907	45	Yes	18S-rR0	4	3	3	144	161	0
ACGGGAAACCTCACCCGGCCCGGACACGGACAGGATTGACAGAT	5.62486232728206	2.03320090408989e-05	0.00982549186253117	44	Yes	18S-rR0	5	3	2	186	157	99
CGGGAAACCTCACCCGGCCCGGACACGGACAGGATTGACAGAT	5.63294796763321	1.14192451287281e-05	0.00609112282470479	43	Yes	18S-rR0	3	7	1	228	211	58
GTGCATGGCCGTTCTTAGTTGGTGGAGCGATTTGTCTGGTT	5.65706507400455	4.57365601439562e-07	0.000383217352580616	41	Yes	18S-rR0	0	10	6	191	417	139
TTAAGTCCCTGCCCTTTGTACACACCGCCCGTCGC	5.72729376436584	5.75205927642133e-06	0.00342048015819552	35	Yes	18S-rR0	9	2	0	311	86	105
TTAAGCAGGAGGTGTCAGAAAAGTTACCACAGGGATAACTGGCT	5.76573149759326	8.43674155614372e-06	0.00473400607015883	44	Yes	28S-rR0	9	1	0	157	308	45
GCGCCGGGGAGGTGGAGCACGAGCGTACGCGTTAGGACCCGAAAG	5.80399611058913	3.77843305583694e-06	0.00238967663380452	45	Yes	28S-rR0	0	3	7	230	171	123
ATTAGTGACGCGCATGAATGGATGAACGAGATTCCCACTGTCCCT	6.21765744799405	6.68348949466721e-09	8.64030977153972e-06	45	Yes	28S-rR0	8	4	2	410	217	66
