# Supplementary material for: Paternal multigenerational exposure to an obesogenic diet drives epigenetic predisposition to metabolic diseases in mice
Source: eLife. 2021 Mar 30;10:e61736. doi: 10.7554/eLife.61736 (PMC8051948; doi:10.7554/eLife.61736)
Supplement: Figure 4—source data 2. [file elife-61736-fig4-data2.xlsx]

## Sheet: DEG WD5
Sequence	logFC	PValue	adjpValue	Length	Match_Genome	Annotation	CD1	CD2	CD3	HFD5.1	HFD5.2
ACTAATCCTAGCCCTAGCCCTACA	-1.16010353892384	3.29451152954095e-06	0.00936565754665776	24	Yes	16S-rR0	49608	18089	25318	19205	14806
TGAGGTAGTAGGTTGTATAGTT	-1.31921336622207	8.83645607275484e-10	7.9446775406978e-06	22	Yes	mmu-let-7a-2;mmu-let-7a-1	38953	54539	44518	7723	37988
TTTGTTCGTTCGGCTCGCGTGA	-1.42308071093039	2.96015767352711e-06	0.00891551488709498	22	Yes	mmu-mir-375	19452	25181	16528	3733	14960
TGATCCTTCGATGTCGGCT	-1.55701867058151	5.05037038905247e-06	0.0130278512827599	19	Yes	28S-rR0	22898	16892	8634	6248	7007
TGTAAACATCCCCGACTGGAAGCT	-1.86060584964931	3.78531906249959e-08	0.000234349103159349	24	Yes	mmu-mir-30d	17244	20622	14537	3790	8025
GGTCGATGATGAGAGCTTTGTTCTGAGC	-1.89066298659841	1.43963811701089e-09	1.21538176123833e-05	28	Yes	snoR0	11556	19257	31119	7767	6309
ACTAATCCTAGCCCTAGCCC	-1.97316434627652	1.56430353582047e-26	1.08951785890476e-21	20	Yes	16S-rR0	79068	66452	83237	28014	20130
TGAGGTAGTAGGTTGTATGGTTT	-2.24138484245852	3.64677253368388e-08	0.00023090286227765	23	Yes	mmu-let-7c-1;mmu-let-7c-2	11006	13663	11118	1614	4621
TACCCTGTAGATCCGAATTTGTG	-2.31803367458437	3.28440186258907e-05	0.049327112501779	23	Yes	mmu-mir-10a	5282	5995	4721	594	2045
TGAGGTAGTAGGTTGTGTGGTT	-2.35746866196111	7.62648658608865e-07	0.00299253666260756	22	Yes	mmu-let-7b	6473	9385	8472	1169	2760
TGAGGTAGTAGGTTGTATGGTT	-2.40642057501628	4.44358778244024e-29	4.12653779416313e-24	22	Yes	mmu-let-7c-2;mmu-let-7c-1	50008	69223	57362	8171	19302
TGAGGTAGTAGTTTGTACAGTT	-2.47333804942391	6.06098995832257e-26	3.37712299487775e-21	22	Yes	mmu-let-7g	37175	69034	39866	5517	16005
TTCAAGTAATCCAGGATAGGCT	-2.49060012180626	1.9000774936141e-26	1.17633797629649e-21	22	Yes	mmu-mir-26a-1;mmu-mir-26a-2	40139	59107	47288	6443	15050
AGCGTTGGATTGTTCACCC	-2.50491288070608	5.92527086466575e-06	0.0143543551003613	19	Yes	28S-rR0	6987	7058	3305	2040	407
ATCCTTCGATGTCGGCT	-2.54854562215504	4.13267628634147e-11	5.2333770454241e-07	17	Yes	28S-rR0	23719	16477	4645	4080	2001
TCCCTGAGACCCTAACTTGTGA	-2.72068974302489	8.55313561226896e-14	1.70204343992862e-09	22	Yes	mmu-mir-125b-1;mmu-mir-125b-2	17372	21302	13651	2047	4436
TGAGGTAGTAGTTTGTGCTGTT	-2.7493459209577	2.52530739888862e-08	0.000165538356421971	22	Yes	mmu-let-7i	5865	11143	7317	461	2517
TGAGGTAGTAGATTGTATAGT	-2.82946485319411	5.94108852844793e-14	1.22604263598737e-09	21	Yes	mmu-let-7f-1;mmu-let-7f-2	11283	26736	11565	1363	4307
TGAGGTAGTAGATTGTATAGTT	-2.86553082429052	2.11948037541407e-38	2.95238317594242e-33	22	Yes	mmu-let-7f-1;mmu-let-7f-2	45493	92850	44604	4260	16199
CCACGAGGACGAGACGTAGCG	-2.88407820221619	1.03581882159325e-07	0.000571433553666876	21	Yes	snoR0	4297	6416	8378	1351	805
TCCCTGAGACCCTTTAACCTGTG	-2.93237936110152	7.34562943414339e-07	0.00290277394639032	23	Yes	mmu-mir-125a	4812	6354	4391	598	1070
GGTCGATGATGAGAGCTTTGTTCTGAGCCA	-2.94498963559645	3.01114490593796e-06	0.00897208465315279	30	Yes	snoR0	2827	4018	5924	1169	213
AGAACGAAAGTCGGAGGTTCG	-2.96181877341021	5.91750908256765e-08	0.000347071251127986	21	Yes	18S-rR0	12844	5907	1282	1598	428
TTCAAGTAATTCAGGATAGGT	-3.10687055492986	2.22164913898695e-05	0.0386100863854522	21	Yes	mmu-mir-26b	2320	3878	2663	224	621
TGTAAACATCCTCGACTGGAAGC	-3.1591819693039	1.54659135143558e-05	0.0301309522764473	23	Yes	mmu-mir-30a	1857	4600	2585	263	565
TAATACTGCCGGGTAATGAT	-3.50654556498734	1.98767222866941e-05	0.0358417828185212	20	Yes	mmu-mir-200c	1907	3366	1648	147	348
TTGCAATGATGTCATCTTACTACTGAA	-3.53552766209751	2.10127827553881e-05	0.037269483090508	27	Yes	processed_transcript;snoR0	884	2319	3266	191	280
TGAGAACTGAATTCCATAGGCTGT	-3.56877128863985	1.63104072102415e-05	0.0312842978745317	24	Yes	mmu-mir-146b	2774	2900	1234	68	403
TAATACTGCCTGGTAATGATG	-3.66334408252715	7.22022692879421e-08	0.000414746210562355	21	Yes	mmu-mir-200b	3459	5778	3071	304	486
TGAGGTAGTAAGTTGTATTGTT	-3.70129222803836	4.55724125515841e-06	0.0120343566585863	22	Yes	mmu-mir-98	1669	4184	1751	94	381
TAGCTTATCAGACTGATGTTG	-3.72158659469565	1.16238762364083e-09	1.02797006091486e-05	21	Yes	mmu-mir-21a	2909	10104	3765	97	937
CTCTGTGCTGAATGTCAAGTTCTGATT	-3.76696281857026	2.45190672152378e-05	0.0405394037437934	27	Yes	miR0	839	2205	2458	145	193
TACCCTGTAGAACCGAATTTG	-3.87798401445499	2.32735909412367e-07	0.00114759399438475	21	Yes	mmu-mir-10b	2720	4532	2459	279	257
AAGAAAGATTGCAAGAACTG	-3.92730178435024	9.01888294640659e-07	0.00339542661412722	20	Yes	mature-mt_tR0-Ser-GCT_5_end	1326	2912	3648	332	100
AACGAAAGTCGGAGGTTCGAAG	-4.04093159462518	2.50391200352302e-05	0.0410339626247938	22	Yes	18S-rR0	3340	1250	318	233	1
TACCTGGTTGATCCTGCCA	-4.10988347991897	8.43637482359721e-09	6.26755158394684e-05	19	Yes	45S-rR0	4996	4246	2482	374	173
ATCAAGAACGAAAGTCGGAGGTTCG	-4.16518797809735	1.92785020994381e-08	0.000130997421765682	25	Yes	18S-rR0	6081	4330	487	334	143
TTCCCTTTGTCATCCTATGCCT	-4.21826855695747	1.22217188033498e-06	0.00442196071431071	22	Yes	mmu-mir-204	3091	2230	1410	1	294
TGCAATGATGTCATCTTACTACTGAAA	-4.27420165350926	4.42382238253394e-17	1.4499468196024e-12	27	Yes	processed_transcript;snoR0	3953	12503	12607	800	449
TCAGTGCACTACAGAACTTTGTCT	-4.37841748801275	1.63310956915525e-05	0.0312842978745317	24	Yes	mmu-mir-148a	800	2696	836	136	30
TTACTTGATGATAGTAAAAGATCTGATG	-4.46015901346626	1.63234691237677e-05	0.0312842978745317	28	Yes	processed_transcript;snoR0	252	2514	1318	0	153
AACCCGTAGATCCGAACTTGTG	-4.52815173893324	1.21499262807496e-06	0.00442196071431071	22	Yes	mmu-mir-100	2046	2427	1279	72	130
AATTTTTTGAGGCCTTGCTTTAGCAAGGCT	-4.60487530827144	5.37392878929437e-07	0.00221799954230143	30	Yes	antisense;snR0	814	2371	2726	164	38
TTGCAATGATGTCATCTTACTACTGAAA	-4.62769303434717	3.17156206581542e-27	2.52451809635956e-22	28	Yes	processed_transcript;snoR0	6695	19010	21683	1137	461
TAATACTGTCTGGTAATGCCG	-4.75787668399422	3.27334647879562e-06	0.00935320986933401	21	Yes	mmu-mir-429	1158	2092	1233	0	136
CGTAAGGGAAAGTTGAAAAG	-4.91059070975167	2.23160449998019e-06	0.00731428065496449	20	Yes	28S-rR0	573	2449	1368	118	0
ATTCTTGGACCGGCGCA	-4.92895711619254	8.84733069518841e-06	0.0197185767602081	17	Yes	18S-rR0	2927	764	55	27	70
TTTTTGAGGCCTTGTTTCGGCAAGGCT	-5.0261250580304	1.61343393927435e-07	0.00083239745983729	27	Yes	snR0	731	3197	1792	142	0
AACATCCTGGTTGCTCCTATCTGATT	-5.52483484909538	4.41308439785509e-08	0.0002672746190914	26	Yes	piR0	830	1276	3001	74	20
TAGCACCATCTGAAATCGGTTAT	-5.58744117456734	2.88023884122079e-07	0.00137165835892292	23	Yes	mmu-mir-29a	839	2970	582	1	72
ACTCTGTGCTGAATGTCAAGTTCTGATT	-5.83909433245687	6.69931621647467e-09	5.04431351710476e-05	28	Yes	miR0	906	2164	2475	24	57
GTCCCTACCTACTATCC	-5.84679536055036	2.02638020081423e-06	0.00668093955083835	17	Yes	28S-rR0	646	1107	1264	43	0
CTGGTGCGGACCAGGGGAA	-5.90390473058334	5.65489673908371e-06	0.0141120899346404	19	Yes	28S-rR0	239	832	1432	35	0
TATCTGTGAGGATAAGTAACTCTGAGG	-6.05618967431893	7.74129507314853e-07	0.00301634419706827	27	Yes	processed_transcript;snoR0	622	1054	1467	39	0
ACAGTAGTCTGCACATTGGTTA	-6.34697208425086	8.47257384174026e-07	0.00325574718543397	22	Yes	mmu-mir-199b;mmu-mir-199a-2;mmu-mir-199a-1	516	1343	1010	1	28
TGTGCTTGGCTGAGGAGC	-6.69647381699243	1.93883642268987e-09	1.6123884572516e-05	18	Yes	28S-rR0	1675	2015	1094	23	14
AATTCTTGGACCGGCGCAAGACGGA	-6.8321944304993	1.65045280150488e-05	0.0312842978745317	25	Yes	18S-rR0	1215	365	60	11	0
AGGTCCCTGGTAGCT	-7.32787214250413	4.74529308612742e-08	0.00028430428544724	15	Yes	piR0	744	1022	1164	0	15
GCATTGGTGGTTCAGTGGTAGAATTCTCG	0.79399846114225	4.25661452760933e-07	0.00182441772972203	29	Yes	mature-tR0-Gly-GCC_5_end	91998	32885	27776	123605	89747
GCATTGGTGGTTCAGTGGTAGAATTCTCGC	0.850153717835794	7.07739303422987e-15	1.64310526030939e-10	30	Yes	mature-tR0-Gly-GCC_5_end	142701	115018	87384	241732	264900
TCCCTGGTGGTCTAGTGGTTAGGATTCGGC	1.30782080868677	2.38723557690664e-47	4.4338126369887e-42	30	Yes	mature-tR0-Glu-CTC_5_end	216207	105605	118300	336647	555725
TCCCTGGTGGTCTAGTGGTTAGGATTCGGCGCTCT	1.38245993440727	3.16743559689463e-15	8.8243172011686e-11	35	Yes	mature-tR0-Glu-CTC_5_end	15716	13273	57221	124030	69806
TCCCTGGTGGTCTAGTGGTTAGGATTCGGCGCTC	1.6024688740884	4.84863838660862e-24	2.07816370971881e-19	34	Yes	mature-tR0-Glu-CTC_5_end	29470	25541	47442	185211	75027
GGTAGCGTGGCCGAGCGGTCTAAGG	1.73856468508703	6.56883285237753e-15	1.59134259870271e-10	25	Yes	mature-tR0-Leu-TAG_5_end;mature-tR0-Leu-AAG_5_end	18885	16724	8660	50210	69133
TCCCTGGTGGTCTAGTGGTTAGGATTCGGCGC	1.85572669076177	2.51886865747808e-59	7.01744213630106e-54	32	Yes	mature-tR0-Glu-CTC_5_end	71742	57638	69939	229178	368078
GCGTTGGTGGTATAGTGGTGAGCATAG	2.09459529836487	5.55489988005251e-11	6.72855361775317e-07	27	Yes	mature-tR0-Gly-TCC_5_end	5847	5751	3862	21227	32570

## Sheet: piRNA
Sequence	logFC	PValue	adjpValue	Length	Match_Genome	Annotation	CD1	CD2	CD3	HFD5.1	HFD5.2
AGGTCCCTGGTAGCT	-7.32787214250413	4.74529308612742e-08	0.00028430428544724	15	Yes	piR0	744	1022	1164	0	15
AACATCCTGGTTGCTCCTATCTGATT	-5.52483484909538	4.41308439785509e-08	0.0002672746190914	26	Yes	piR0	830	1276	3001	74	20

## Sheet: miRNA
Sequence	logFC	PValue	adjpValue	Length	Match_Genome	Annotation	CD1	CD2	CD3	HFD5.1	HFD5.2
TGAGGTAGTAGGTTGTATAGTT	-1.31921336622207	8.83645607275484e-10	7.9446775406978e-06	22	Yes	mmu-let-7a-2;mmu-let-7a-1	38953	54539	44518	7723	37988
TGAGGTAGTAGGTTGTGTGGTT	-2.35746866196111	7.62648658608865e-07	0.00299253666260756	22	Yes	mmu-let-7b	6473	9385	8472	1169	2760
TGAGGTAGTAGGTTGTATGGTTT	-2.24138484245852	3.64677253368388e-08	0.00023090286227765	23	Yes	mmu-let-7c-1;mmu-let-7c-2	11006	13663	11118	1614	4621
TGAGGTAGTAGGTTGTATGGTT	-2.40642057501628	4.44358778244024e-29	4.12653779416313e-24	22	Yes	mmu-let-7c-2;mmu-let-7c-1	50008	69223	57362	8171	19302
TGAGGTAGTAGATTGTATAGTT	-2.86553082429052	2.11948037541407e-38	2.95238317594242e-33	22	Yes	mmu-let-7f-1;mmu-let-7f-2	45493	92850	44604	4260	16199
TGAGGTAGTAGATTGTATAGT	-2.82946485319411	5.94108852844793e-14	1.22604263598737e-09	21	Yes	mmu-let-7f-1;mmu-let-7f-2	11283	26736	11565	1363	4307
TGAGGTAGTAGTTTGTACAGTT	-2.47333804942391	6.06098995832257e-26	3.37712299487775e-21	22	Yes	mmu-let-7g	37175	69034	39866	5517	16005
TGAGGTAGTAGTTTGTGCTGTT	-2.7493459209577	2.52530739888862e-08	0.000165538356421971	22	Yes	mmu-let-7i	5865	11143	7317	461	2517
AACCCGTAGATCCGAACTTGTG	-4.52815173893324	1.21499262807496e-06	0.00442196071431071	22	Yes	mmu-mir-100	2046	2427	1279	72	130
TACCCTGTAGATCCGAATTTGTG	-2.31803367458437	3.28440186258907e-05	0.049327112501779	23	Yes	mmu-mir-10a	5282	5995	4721	594	2045
TACCCTGTAGAACCGAATTTG	-3.87798401445499	2.32735909412367e-07	0.00114759399438475	21	Yes	mmu-mir-10b	2720	4532	2459	279	257
TCCCTGAGACCCTTTAACCTGTG	-2.93237936110152	7.34562943414339e-07	0.00290277394639032	23	Yes	mmu-mir-125a	4812	6354	4391	598	1070
TCCCTGAGACCCTAACTTGTGA	-2.72068974302489	8.55313561226896e-14	1.70204343992862e-09	22	Yes	mmu-mir-125b-1;mmu-mir-125b-2	17372	21302	13651	2047	4436
TGAGAACTGAATTCCATAGGCTGT	-3.56877128863985	1.63104072102415e-05	0.0312842978745317	24	Yes	mmu-mir-146b	2774	2900	1234	68	403
TCAGTGCACTACAGAACTTTGTCT	-4.37841748801275	1.63310956915525e-05	0.0312842978745317	24	Yes	mmu-mir-148a	800	2696	836	136	30
ACAGTAGTCTGCACATTGGTTA	-6.34697208425086	8.47257384174026e-07	0.00325574718543397	22	Yes	mmu-mir-199b;mmu-mir-199a-2;mmu-mir-199a-1	516	1343	1010	1	28
TAATACTGCCTGGTAATGATG	-3.66334408252715	7.22022692879421e-08	0.000414746210562355	21	Yes	mmu-mir-200b	3459	5778	3071	304	486
TAATACTGCCGGGTAATGAT	-3.50654556498734	1.98767222866941e-05	0.0358417828185212	20	Yes	mmu-mir-200c	1907	3366	1648	147	348
TTCCCTTTGTCATCCTATGCCT	-4.21826855695747	1.22217188033498e-06	0.00442196071431071	22	Yes	mmu-mir-204	3091	2230	1410	1	294
TAGCTTATCAGACTGATGTTG	-3.72158659469565	1.16238762364083e-09	1.02797006091486e-05	21	Yes	mmu-mir-21a	2909	10104	3765	97	937
TTCAAGTAATCCAGGATAGGCT	-2.49060012180626	1.9000774936141e-26	1.17633797629649e-21	22	Yes	mmu-mir-26a-1;mmu-mir-26a-2	40139	59107	47288	6443	15050
TTCAAGTAATTCAGGATAGGT	-3.10687055492986	2.22164913898695e-05	0.0386100863854522	21	Yes	mmu-mir-26b	2320	3878	2663	224	621
TAGCACCATCTGAAATCGGTTAT	-5.58744117456734	2.88023884122079e-07	0.00137165835892292	23	Yes	mmu-mir-29a	839	2970	582	1	72
TGTAAACATCCTCGACTGGAAGC	-3.1591819693039	1.54659135143558e-05	0.0301309522764473	23	Yes	mmu-mir-30a	1857	4600	2585	263	565
TGTAAACATCCCCGACTGGAAGCT	-1.86060584964931	3.78531906249959e-08	0.000234349103159349	24	Yes	mmu-mir-30d	17244	20622	14537	3790	8025
TTTGTTCGTTCGGCTCGCGTGA	-1.42308071093039	2.96015767352711e-06	0.00891551488709498	22	Yes	mmu-mir-375	19452	25181	16528	3733	14960
TAATACTGTCTGGTAATGCCG	-4.75787668399422	3.27334647879562e-06	0.00935320986933401	21	Yes	mmu-mir-429	1158	2092	1233	0	136
TGAGGTAGTAAGTTGTATTGTT	-3.70129222803836	4.55724125515841e-06	0.0120343566585863	22	Yes	mmu-mir-98	1669	4184	1751	94	381

## Sheet: tsRNA
Sequence	logFC	PValue	adjpValue	Length	Match_Genome	Annotation	CD1	CD2	CD3	HFD5.1	HFD5.2
TCCCTGGTGGTCTAGTGGTTAGGATTCGGCGC	1.85572669076177	2.51886865747808e-59	7.01744213630106e-54	32	Yes	mature-tR0-Glu-CTC_5_end	71742	57638	69939	229178	368078
TCCCTGGTGGTCTAGTGGTTAGGATTCGGCGCTC	1.6024688740884	4.84863838660862e-24	2.07816370971881e-19	34	Yes	mature-tR0-Glu-CTC_5_end	29470	25541	47442	185211	75027
TCCCTGGTGGTCTAGTGGTTAGGATTCGGCGCTCT	1.38245993440727	3.16743559689463e-15	8.8243172011686e-11	35	Yes	mature-tR0-Glu-CTC_5_end	15716	13273	57221	124030	69806
TCCCTGGTGGTCTAGTGGTTAGGATTCGGC	1.30782080868677	2.38723557690664e-47	4.4338126369887e-42	30	Yes	mature-tR0-Glu-CTC_5_end	216207	105605	118300	336647	555725
GCATTGGTGGTTCAGTGGTAGAATTCTCGC	0.850153717835794	7.07739303422987e-15	1.64310526030939e-10	30	Yes	mature-tR0-Gly-GCC_5_end	142701	115018	87384	241732	264900
GCATTGGTGGTTCAGTGGTAGAATTCTCG	0.79399846114225	4.25661452760933e-07	0.00182441772972203	29	Yes	mature-tR0-Gly-GCC_5_end	91998	32885	27776	123605	89747
GCGTTGGTGGTATAGTGGTGAGCATAG	2.09459529836487	5.55489988005251e-11	6.72855361775317e-07	27	Yes	mature-tR0-Gly-TCC_5_end	5847	5751	3862	21227	32570
GGTAGCGTGGCCGAGCGGTCTAAGG	1.73856468508703	6.56883285237753e-15	1.59134259870271e-10	25	Yes	mature-tR0-Leu-TAG_5_end;mature-tR0-Leu-AAG_5_end	18885	16724	8660	50210	69133

## Sheet: mt tsRNA
Sequence	logFC	PValue	adjpValue	Length	Match_Genome	Annotation	CD1	CD2	CD3	HFD5.1	HFD5.2
AAGAAAGATTGCAAGAACTG	-3.92730178435024	9.01888294640659e-07	0.00339542661412722	20	Yes	mature-mt_tR0-Ser-GCT_5_end	1326	2912	3648	332	100

## Sheet: rsRNA
Sequence	logFC	PValue	adjpValue	Length	Match_Genome	Annotation	CD1	CD2	CD3	HFD5.1	HFD5.2
AATTCTTGGACCGGCGCAAGACGGA	-6.8321944304993	1.65045280150488e-05	0.0312842978745317	25	Yes	18S-rR0	1215	365	60	11	0
TGTGCTTGGCTGAGGAGC	-6.69647381699243	1.93883642268987e-09	1.6123884572516e-05	18	Yes	28S-rR0	1675	2015	1094	23	14
CTGGTGCGGACCAGGGGAA	-5.90390473058334	5.65489673908371e-06	0.0141120899346404	19	Yes	28S-rR0	239	832	1432	35	0
GTCCCTACCTACTATCC	-5.84679536055036	2.02638020081423e-06	0.00668093955083835	17	Yes	28S-rR0	646	1107	1264	43	0
ATTCTTGGACCGGCGCA	-4.92895711619254	8.84733069518841e-06	0.0197185767602081	17	Yes	18S-rR0	2927	764	55	27	70
CGTAAGGGAAAGTTGAAAAG	-4.91059070975167	2.23160449998019e-06	0.00731428065496449	20	Yes	28S-rR0	573	2449	1368	118	0
ATCAAGAACGAAAGTCGGAGGTTCG	-4.16518797809735	1.92785020994381e-08	0.000130997421765682	25	Yes	18S-rR0	6081	4330	487	334	143
TACCTGGTTGATCCTGCCA	-4.10988347991897	8.43637482359721e-09	6.26755158394684e-05	19	Yes	45S-rR0	4996	4246	2482	374	173
AACGAAAGTCGGAGGTTCGAAG	-4.04093159462518	2.50391200352302e-05	0.0410339626247938	22	Yes	18S-rR0	3340	1250	318	233	1
AGAACGAAAGTCGGAGGTTCG	-2.96181877341021	5.91750908256765e-08	0.000347071251127986	21	Yes	18S-rR0	12844	5907	1282	1598	428
ATCCTTCGATGTCGGCT	-2.54854562215504	4.13267628634147e-11	5.2333770454241e-07	17	Yes	28S-rR0	23719	16477	4645	4080	2001
AGCGTTGGATTGTTCACCC	-2.50491288070608	5.92527086466575e-06	0.0143543551003613	19	Yes	28S-rR0	6987	7058	3305	2040	407
TACCTGGTTGATCCTGCC	-2.27962919600696	2.14737079536219e-15	6.29733438667295e-11	18	Yes	45S-rR0	36844	33441	16287	4251	10169
ACTAATCCTAGCCCTAGCCC	-1.97316434627652	1.56430353582047e-26	1.08951785890476e-21	20	Yes	16S-rR0	79068	66452	83237	28014	20130
TGATCCTTCGATGTCGGCT	-1.55701867058151	5.05037038905247e-06	0.0130278512827599	19	Yes	28S-rR0	22898	16892	8634	6248	7007
ACTAATCCTAGCCCTAGCCCTACA	-1.16010353892384	3.29451152954095e-06	0.00936565754665776	24	Yes	16S-rR0	49608	18089	25318	19205	14806
