# Supplementary figures and images for: Paternal multigenerational exposure to an obesogenic diet drives epigenetic predisposition to metabolic diseases in mice
Source: eLife journal article supplement (doi:10.7554/elife.61736), 2021-03-29

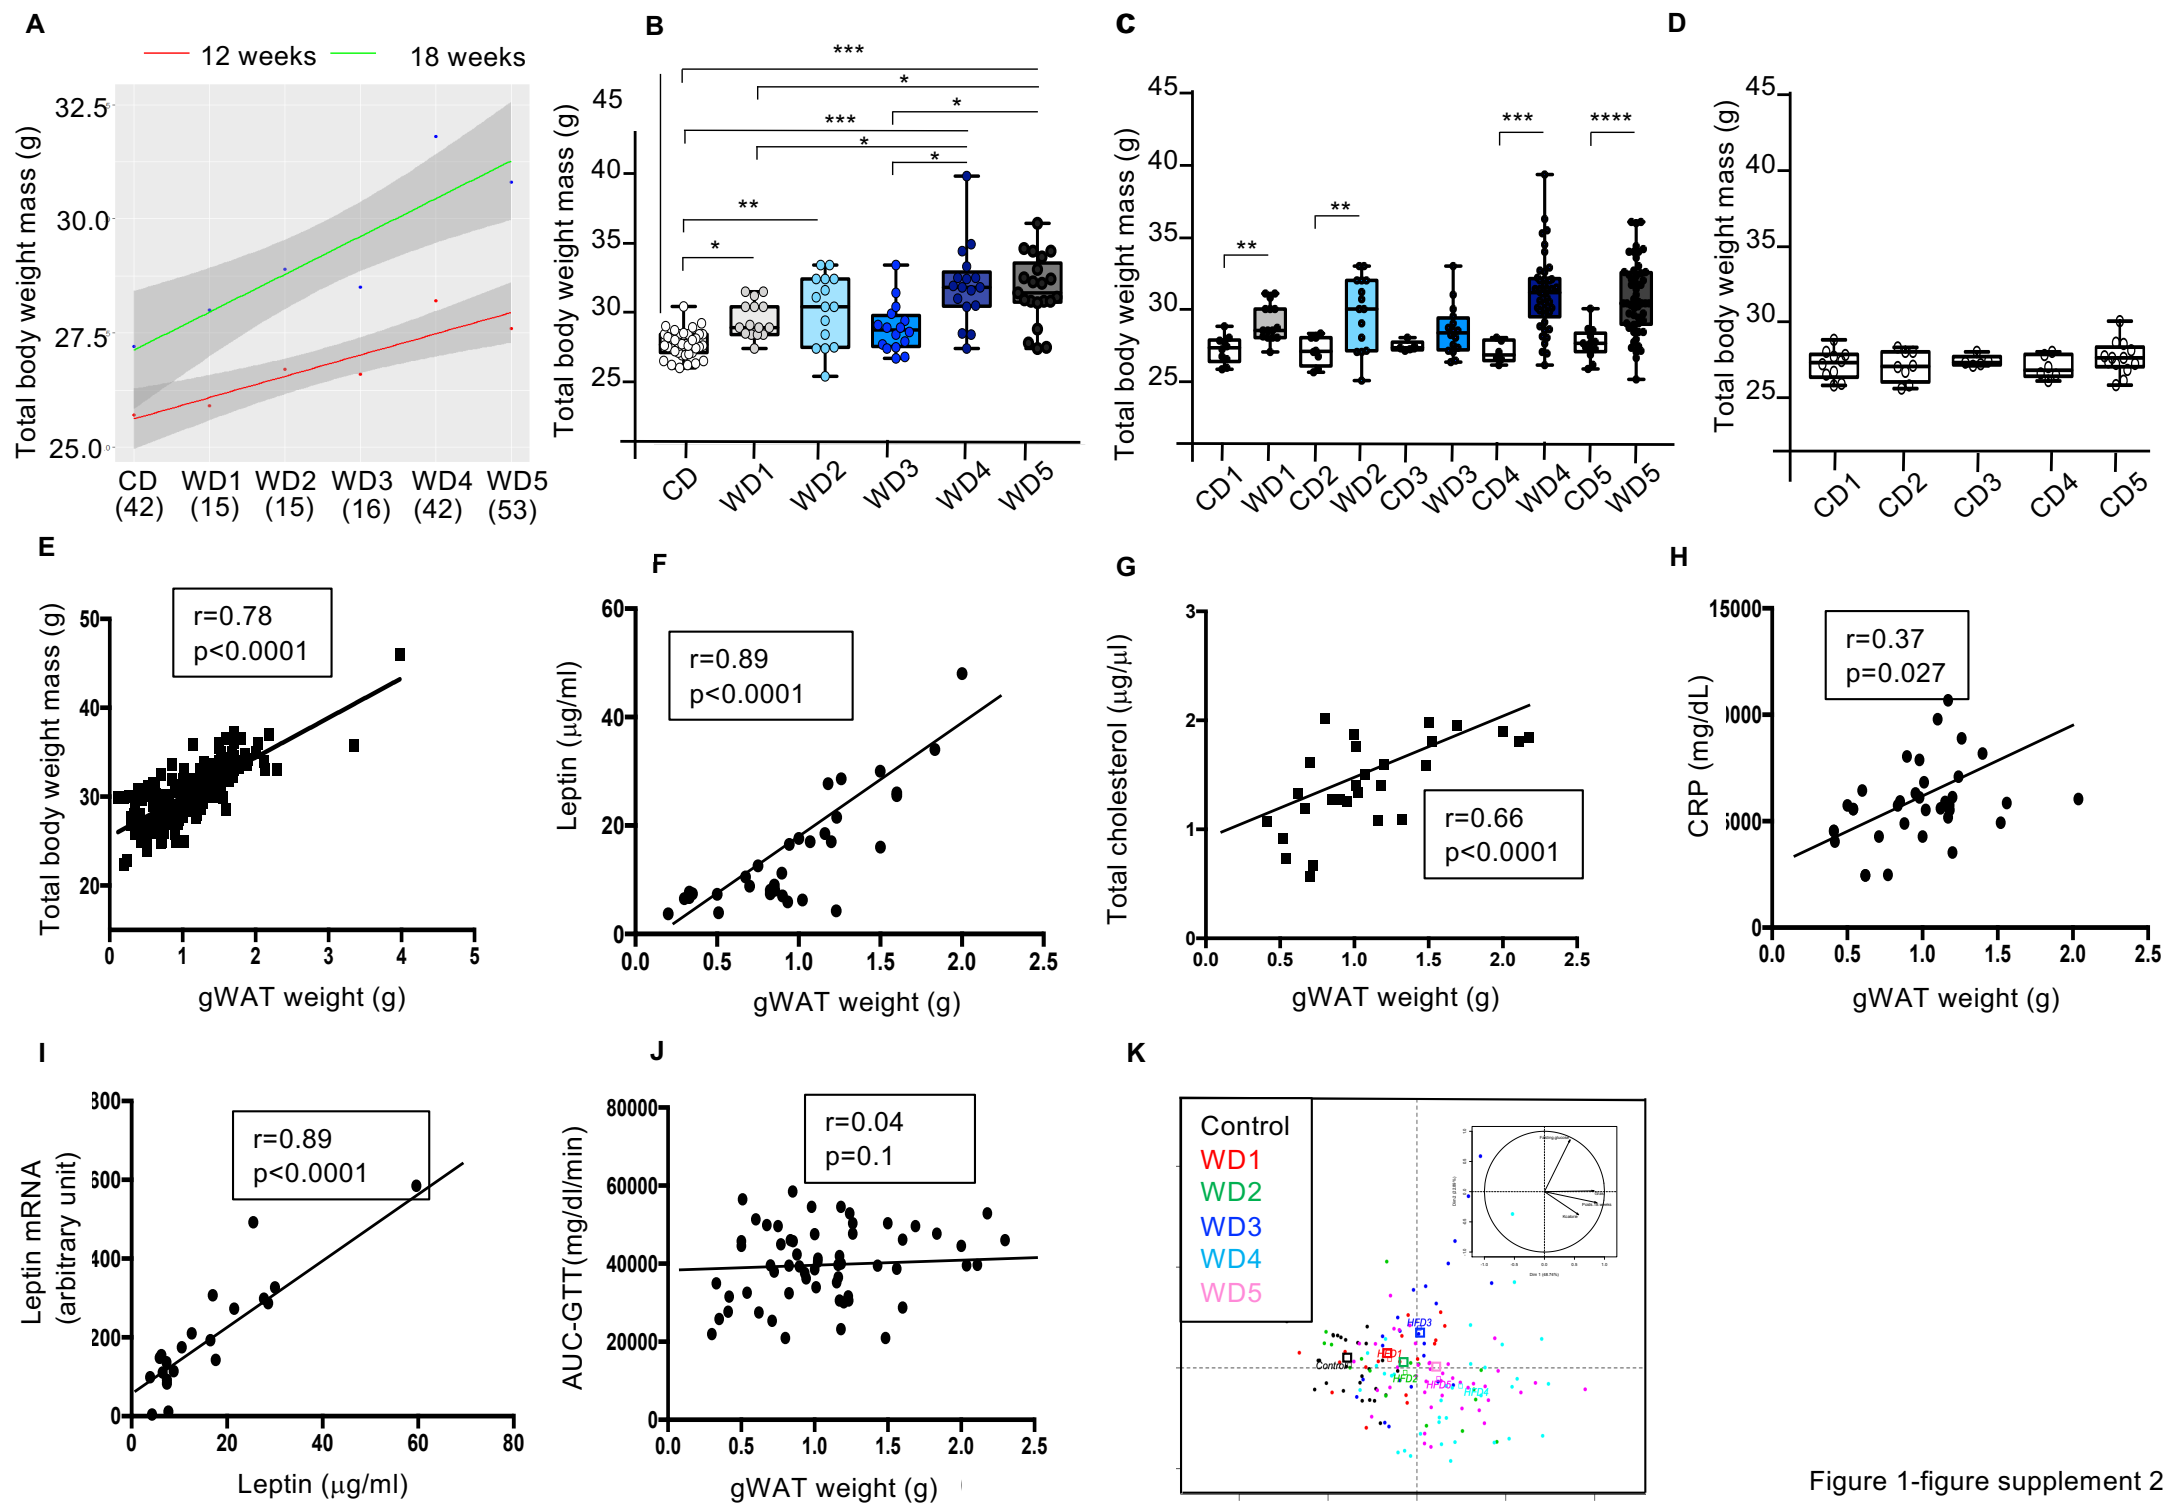

Supplement: supp [file elife-61736-supp-v1.zip]

**A**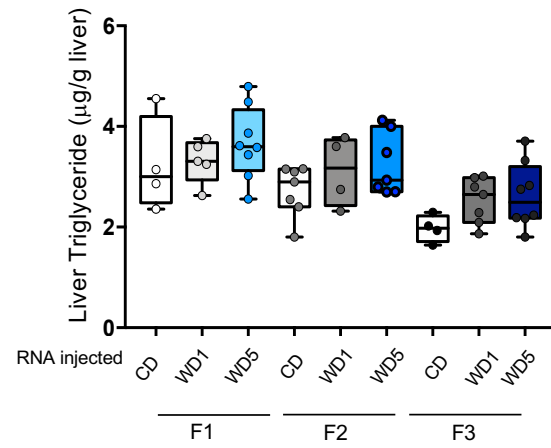**B**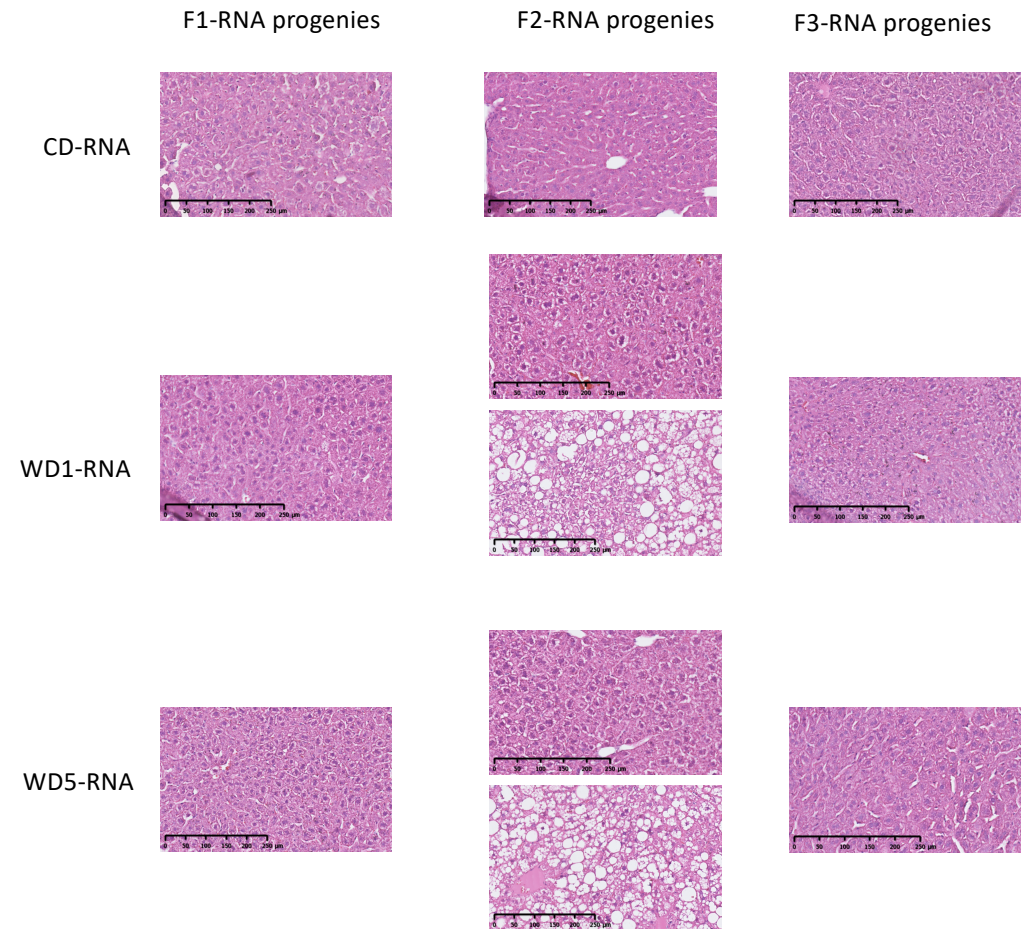

Figure 5-figure supplement 1

Supplement: supp [file elife-61736-supp-v1.zip]

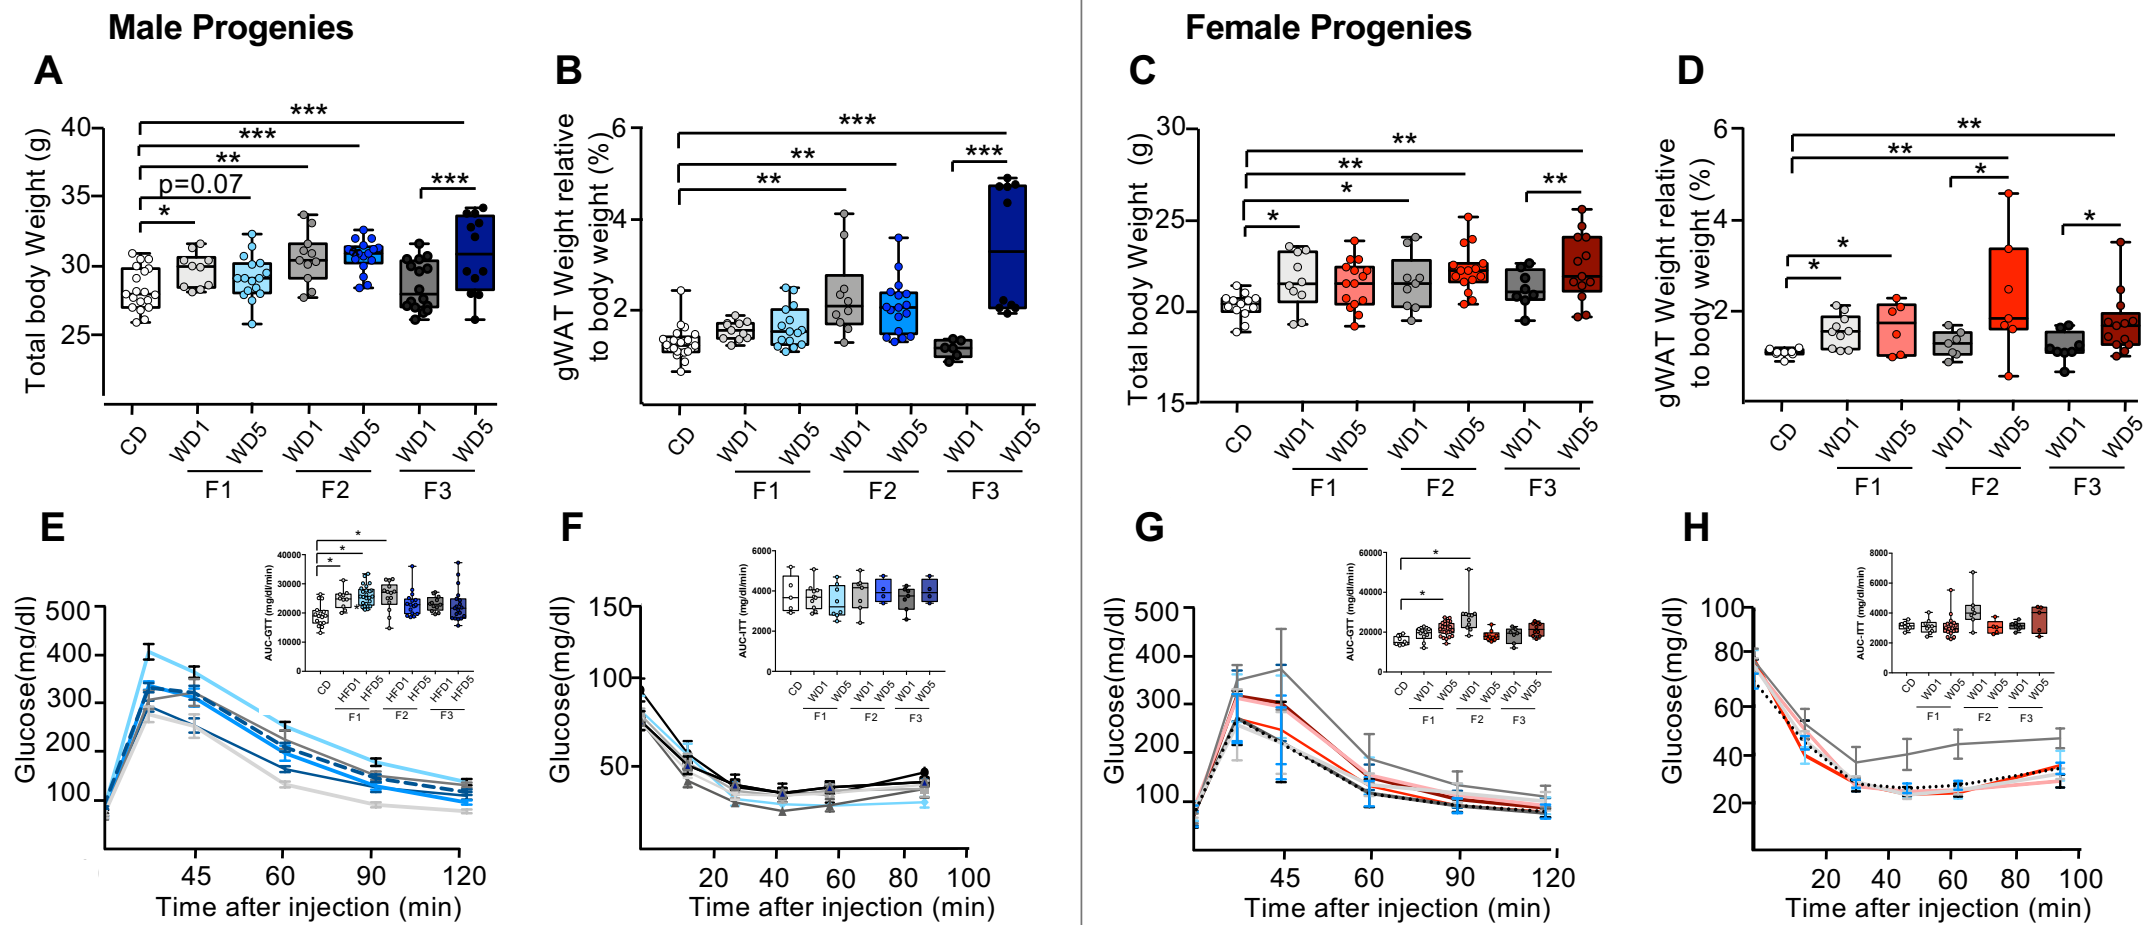

Figure 3-figure supplement 1

Supplement: supp [file elife-61736-supp-v1.zip]

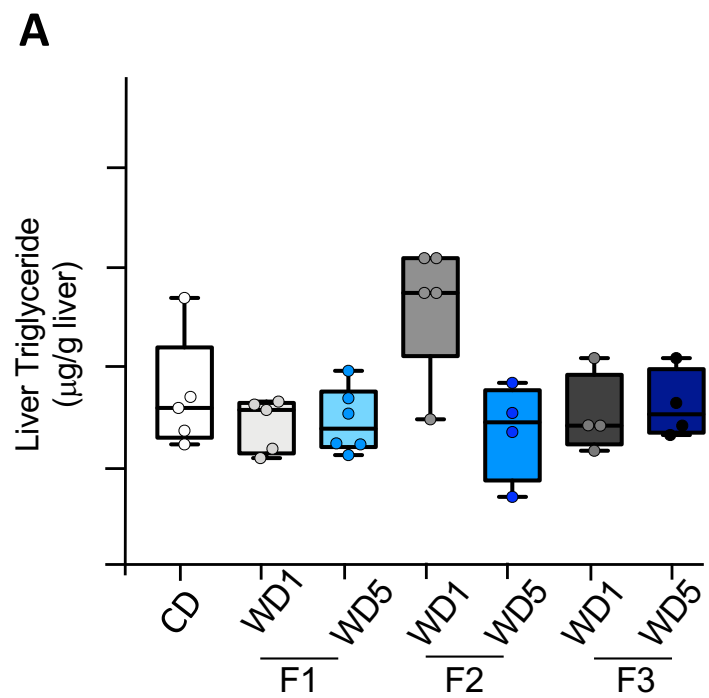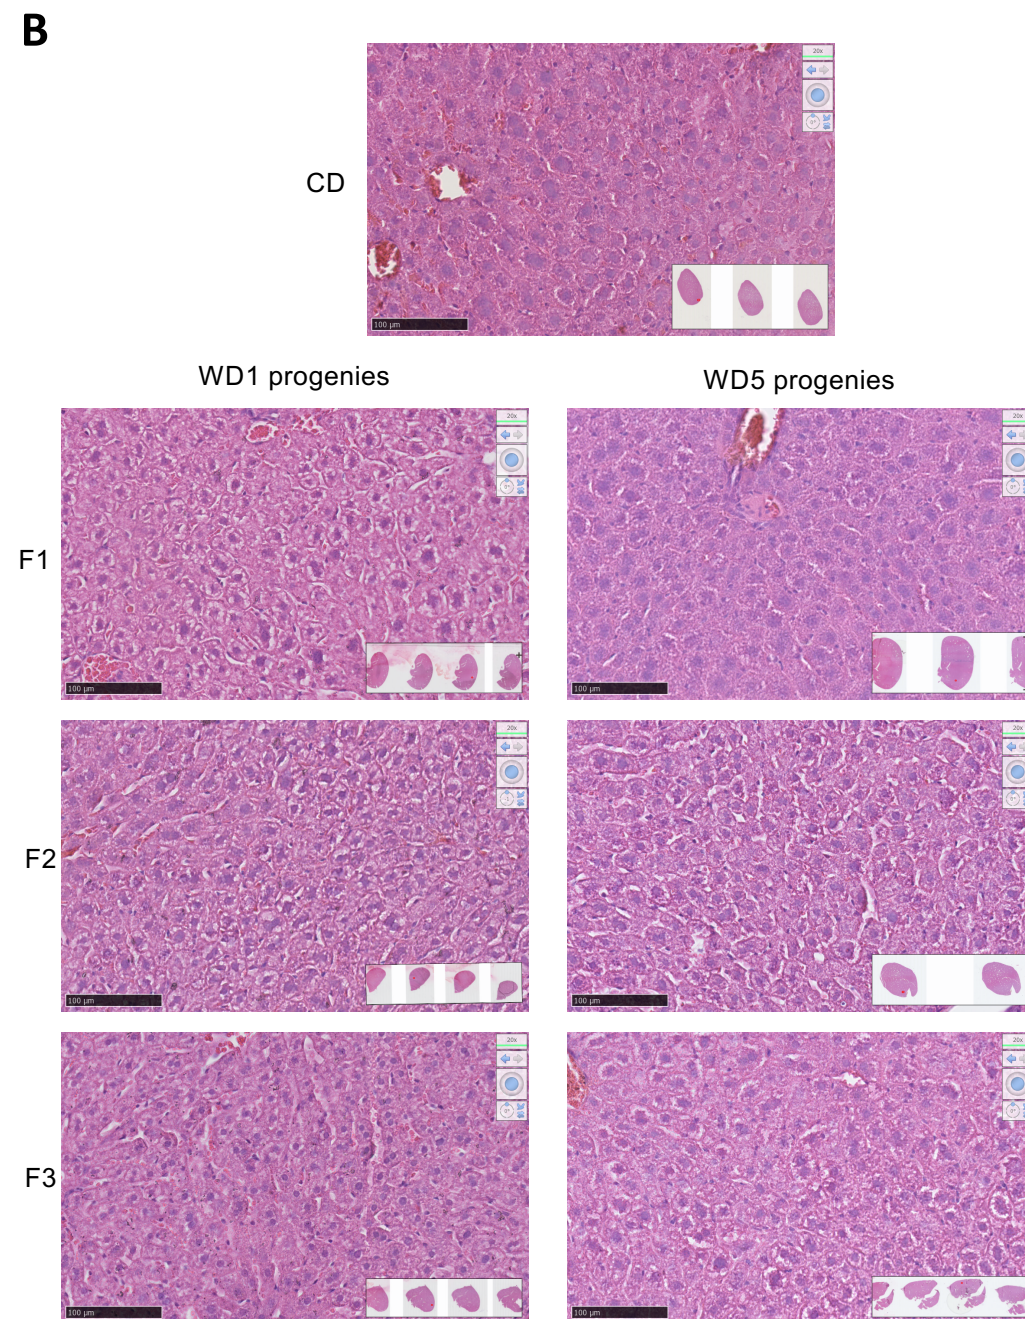

Figure 3-figure supplement 2

Supplement: supp [file elife-61736-supp-v1.zip]

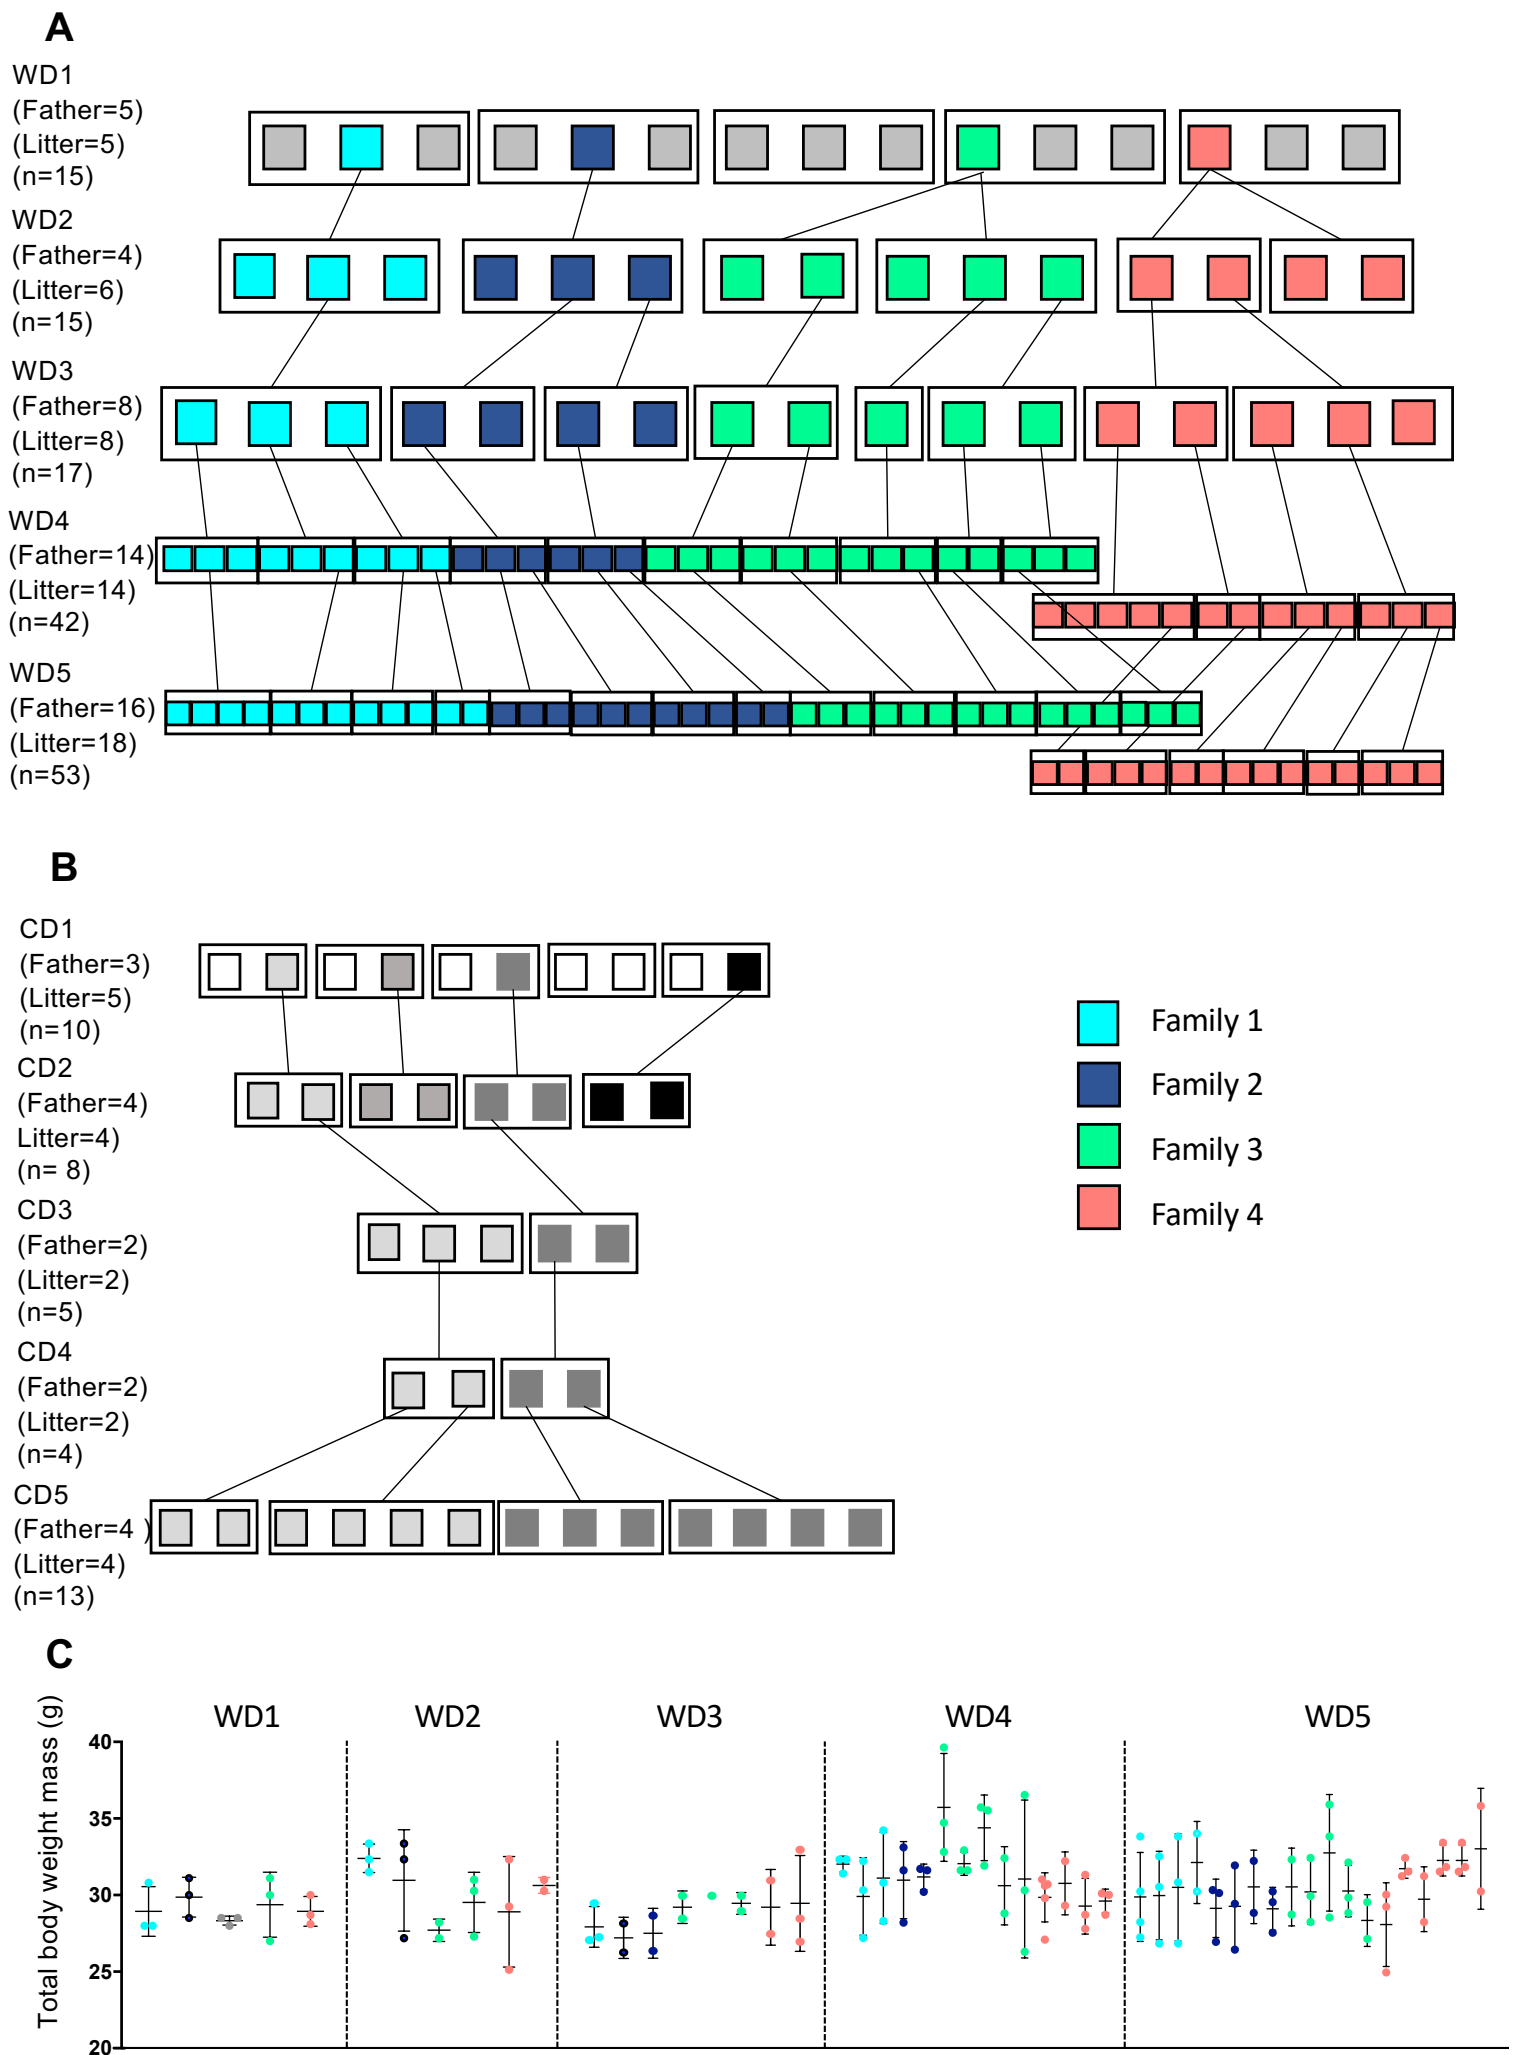

Figure 1-figure supplement 1

Supplement: supp [file elife-61736-supp-v1.zip]
